McLaughlin et al.

## Single-cell transcriptomes of developing and adult olfactory receptor neurons in *Drosophila*

Colleen N. McLaughlin<sup>1,9</sup>, Maria Brbić<sup>3,9</sup>, Qijing Xie<sup>1,2</sup>, Tongchao Li<sup>1</sup>, Felix Horns<sup>4,5</sup>, Sai Saroja Kolluru<sup>4,8</sup>, Justus M. Kebschull<sup>1</sup>, David Vacek<sup>1</sup>, Anthony Xie<sup>1</sup>, Jiefu Li<sup>1,7</sup>, Robert C. Jones<sup>4</sup>, Jure Leskovec<sup>3</sup>, Steven R. Quake<sup>4,6,8\*</sup>, Liqun Luo<sup>1\*</sup>, Hongjie Li<sup>1</sup>

<sup>1</sup>Department of Biology, Howard Hughes Medical Institute, Stanford University, Stanford, United States

<sup>2</sup>Neurosciences Graduate Program, Stanford University, Stanford, United States

<sup>3</sup>Department of Computer Science, Stanford University, Stanford, United States

<sup>4</sup>Department of Bioengineering, Stanford University, Stanford, United States

<sup>5</sup>Biophysics Graduate Program, Stanford University, Stanford, United States

<sup>6</sup>Department of Applied Physics, Stanford University, Stanford, United States

<sup>7</sup>Biology Graduate Program, Stanford University, Stanford, United States

<sup>8</sup>Chan Zuckerberg Biohub, Stanford, United States

<sup>9</sup>co-first authors

\*For correspondence: [lluo@stanford.edu](mailto:lluo@stanford.edu), [steve@quake-lab.org](mailto:steve@quake-lab.org)

### Abstract

Recognition of environmental cues is essential for the survival of all organisms. Precise transcriptional changes occur to enable the generation and function of the neural circuits underlying sensory perception. To gain insight into these changes, we generated single-cell transcriptomes of *Drosophila* olfactory receptor neurons (ORNs), thermosensory and hygrosensory neurons from the third antennal segment at an early developmental and adult stage. We discovered that ORNs maintain expression of the same olfactory receptors across development. Using these receptors and computational approaches, we matched transcriptomic clusters corresponding to anatomically and physiologically defined neuronal types across multiple developmental stages. Cell-type-specific transcriptomes, in part, reflected axon trajectory choices in early development and sensory modality in adults. Our analysis also uncovered type-specific and broadly expressed genes that could modulate adult sensory responses. Collectively, our data reveal important transcriptomic features of sensory neuron biology and provides a resource for future studies of their development and physiology.

### Introduction

Detection of sensory stimuli is critical for animals to find food, identify mates, recognize suitable habitats, and evade predators and harmful conditions. Specialized sensory neurons have evolved to discriminate and transmit information relating to chemical, thermal, and hygrosensory stimuli. In *Drosophila*, the ~50 types of primary sensory neurons that detect these cues are found in the third segment of the antenna and also the arista, a branched structure emanating from the antenna (Figure 1A). The majority of neurons in this sensory organ are olfactory receptor neurons (ORNs) that respond to a variety of volatile compounds (Hallem & Carlson, 2004; Hallem et al., 2006; Silbering et al., 2011). A subset of neurons in the antenna and arista respond to temperature and humidity-related stimuli (Yao et al., 2005; Barbagallo & Garrity, 2015; Enjin et al., 2016; Knecht et al., 2017). Each of the ~44 types of antennal ORNs expresses a distinct sensory receptor, or a unique combination of 2–3 receptors. Neurons that express the same receptor(s) also project their axons to the same glomerulus of the antennal lobe in the brain (Couto et al., 2005; Fishilevich & Vosshall, 2005; Benton et al., 2009; Silbering et al., 2011). Here, their axons form one-to-one connections with the dendrites of second-order projection neurons (PNs), thus creating discrete and anatomically stereotyped information processing channels (Figure 1A).

Prior to carrying out their function in the adult, ORNs undergo multiple steps of development. This begins with their birth in the early pupal stage. Subsequently, ORNs extend their axons from the antenna into the brain where they take distinct trajectories around the antennal lobe, a process that positions them

McLaughlin et al.

52 closer to their glomerular targets (Joo et al., 2013; Li et al., 2018) (Figure 1B, left). Axons next enter the  
53 antennal lobe to find and synapse with their partner PN's dendrites (Jefferis et al., 2004; Mosca and Luo,  
54 2014) (Figure 1B, middle). Concomitant with circuit formation and maturation, all ORN types express their  
55 unique olfactory receptor(s). Both the stereotyped development and organization of this system make it  
56 an excellent model to study molecular mechanisms of neuronal specification, axon guidance, and  
57 sensory physiology. However, little is known about the dynamic and cell-type specific transcriptional  
58 changes that occur to enable these distinct processes.

59  
60 Single-cell RNA sequencing (scRNA-seq) is a powerful tool to investigate the mechanisms underlying  
61 nervous system development and function (Ofengeim et al., 2017; Mu et al., 2019; Li, 2020). Recent  
62 scRNA-seq studies in the *Drosophila* nervous system have enabled the discovery of new cell types,  
63 mechanisms important for development and aging, and genes controlling neural specification and wiring  
64 (Li et al., 2017; Croset et al., 2018; Davie et al., 2018; Avalos et al., 2019; Allen et al., 2020). Our recent  
65 study at a mid-developmental stage demonstrates that single-cell transcriptomic clusters represent  
66 anatomically and functionally distinct ORN types (Li et al., 2020). Yet, the mechanisms enabling sensory  
67 neuron types to transition through distinct developmental states into functional adult cells remain  
68 enigmatic. Furthermore, it has been difficult to obtain single-cell transcriptomic access to adult ORNs as  
69 these cells, like many other peripheral tissues in insects, are encapsulated within the hardened cuticle  
70 and cannot be isolated without substantial damage.

71  
72 Here, we developed a single-nucleus RNA-seq (snRNA-seq) protocol to profile adult ORNs,  
73 thermosensory and hygrosensory neurons. We also used single-cell RNA-seq to profile these neurons  
74 at an early pupal stage. On a global level, we observed a shift in gene expression as neurons advance  
75 through development, from axon guidance-related transcripts to those important for sensory function. At  
76 the cell-type level, transcriptomic clusters corresponded to anatomically and functionally defined neuron  
77 types, allowing us to assign the cell-type identity of ~60% of developing and ~80% of adult clusters. Cell-  
78 type-specific transcriptomes, in part, reflected axon trajectory choice in early development but  
79 physiological functions in adults. Finally, we uncovered a set of genes in adult neurons that may function  
80 to regulate the detection or transmission of sensory information. Altogether, this dataset provides an  
81 important foundation for investigating molecular mechanisms controlling sensory neuron development  
82 and function.

## 83 84 **Results**

### 85 **Single-cell transcriptomic profiling of *Drosophila* olfactory receptor neurons**

86 Recently, we performed scRNA-seq on ORNs at a mid-developmental timepoint, 42–48h after puparium  
87 formation (APF; hereafter 42h APF), as their axons are in the final stage of selecting synaptic partner  
88 PNs (Li et al., 2020) (Figure 1B, middle). We sought to more completely understand how transcriptomic  
89 changes underlie the differentiation and function of these cells by profiling them at two additional stages:  
90 24–30h APF and 3–10-day old adult (hereafter 24h APF and adult, respectively). For simplicity we will  
91 refer to the neurons within the third antennal segment as ORNs since they are the vast majority of  
92 neurons in this structure and their development and function are better studied, though a small number  
93 of hygrosensory and thermosensory neurons exist in this sensory organ (Barbagallo and Garrity, 2015)  
94 (see Figure 7). At 24h APF, ORN axons have just begun to circumnavigate the antennal lobe after  
95 selecting a specific trajectory, which is necessary for proper glomerular targeting (Figure 1B, left) (Joo et  
96 al., 2013). Thus, we reasoned that scRNA-seq of 24h APF neurons would provide us with a more  
97 comprehensive picture of their development and axon targeting. Adult single-cell transcriptomes are  
98 important for understanding how distinct ORN types detect and transmit sensory information, and adult  
99 cell types should be readily distinguishable by the specific sensory receptors they express. However,  
100 since adult ORNs are emmeshed in the hardened cuticle, they could not be readily isolated using  
101 standard scRNA-seq methods.

102

McLaughlin et al.

103 Therefore, we established a single-nucleus RNA-seq (snRNA-seq) protocol to profile adult ORNs (Figure  
104 1C), as similar methods have been used to gain transcriptomic access to cell types that are resistant to  
105 standard dissociation protocols in other organisms (Habib et al., 2017; Denisenko et al., 2020; Ding et  
106 al., 2020; Kebschull et al., 2020). Our snRNA-seq protocol is comparable to our scRNA-seq method, in  
107 which GFP-labeled neurons in third antennal segment were dissected and dissociated into a single-cell  
108 suspension, sorted into 384-well plates via fluorescence activated cell sorting (FACS), and sequenced  
109 using the SMART-seq2 platform (Picelli et al., 2014) (Figure 1C, top). snRNA-seq differed from scRNA-  
110 seq at four steps (Figure 1C, bottom). First, instead of labeling neuronal membranes with *mCD8-GFP*,  
111 we labeled their nuclear envelopes with *unc84-GFP* (Henry et al., 2012). Second, nuclei were dissociated  
112 mechanically rather than enzymatically. Third, nuclei were labeled with a Hoechst, a fluorescent DNA  
113 stain, prior to being sorted in to 384-well plates via FACS. Finally, since nuclei contain less RNA content  
114 than whole cells, nuclear cDNA was amplified using 3 additional PCR cycles and sequencing reads were  
115 aligned to both exons and introns, instead of exons alone for scRNA-seq (Figure 1C; see Figure 2).

116  
117 By combining scRNA-seq and snRNA-seq, we sequenced 24h APF and adult neurons to a depth of ~1  
118 million reads per cell/nucleus. Following quality filtering for cells/nuclei with  $\geq 50,000$  reads that express  
119 at least 2 out of 5 neuronal markers (see Methods), we obtained 1,198 and 1,891 high-quality neurons  
120 at 24h APF and adult, respectively (Figure 1D, E). Together with the 1,016 42h APF ORNs (Li et al.,  
121 2020), we have a total of 4,105 neurons, representing three distinct developmental stages. Confirming  
122 transcriptomic quality, we observed high expression of neuronal markers, and the antennal cell marker  
123 *pebbled* (*peb*), but did not detect the glial marker *reversed polarity* (*repo*) in cells at all three stages  
124 (Figure 1E). Transcriptomes could be readily separated into their respective developmental stages  
125 following unbiased clustering using differentially expressed genes identified from all stages (Figure 1F).  
126 Further, we observed stage-specific expression of select genes, such as *miple1* in 24h and 42h APF  
127 ORNs, as well as adult-specific expression of the olfactory co-receptor *Orco* and the odorant binding  
128 protein *Obp19d* (Figure 1G–I). These data demonstrate the reliability of our single-cell and single-nucleus  
129 RNA-seq protocols and suggest that substantial transcriptomic changes occur as development proceeds.

### 131 **Comparison of single-nucleus and single-cell RNA-seq**

132 Prior to examining ORN transcriptomes, we compared our snRNA-seq protocol to scRNA-seq. Since we  
133 were unable to directly evaluate adult ORN cells and nuclei, we sequenced 24h APF ORN nuclei to  
134 compare with cells at the same stage (Figure 2A). 24h APF ORN nuclei were labeled by driving nuclear-  
135 GFP with either the pan-neuronal *elav-GAL4* or *AM29-GAL4* which labels two ORN types (Figure 2A;  
136 Figure 2—supplement 1A) (Endo et al., 2007). We used pan-neuronal *nSyb-GAL4* to label adult ORNs.  
137 To evaluate if this technique is broadly applicable to fly neurons, we also sequenced adult PN nuclei the  
138 majority of which were labeled with *VT033006-GAL4* (Tirian & Dickson, 2017; see the companion  
139 manuscript by Xie et al. for details), to compare to stage-matched cells labeled with *GH146-GAL4* (Figure  
140 2A).

141  
142 We began by comparing the number of uniquely mapped reads and genes detected in cells to nuclei. We  
143 expected that snRNA-seq reads would be lower than scRNA-seq because nuclear transcripts are only a  
144 fraction of those found in the entire cell. When we aligned sequencing reads to exons only, both the  
145 number of mapped reads and genes detected in ORN nuclei were reduced compared to cells (Figure 2—  
146 supplement 1B, C). We tested if aligning nuclear sequencing reads to exons and introns could increase  
147 the gene detection rate, since intronic reads comprised 32.7% and 26.2% of total reads in 24h APF and  
148 adult ORN nuclei, respectively, compared to 10.5% when included in 24h APF cell reads (Figure 2—  
149 supplement 1D). In ORNs, we observed that inclusion of intronic reads increased average gene detection  
150 rate in 24h APF (from ~520 to ~700) and adult (from ~950 to ~1,100) nuclei, compared to 24h APF  
151 (~1,700) exonically aligned cell reads (Figure 2C, Figure 2—supplement 1C). Similarly, intronic reads  
152 were ~27% of total PN reads; when they were added into exonic reads, the mean number of genes  
153 detected increases from ~1,000 to ~1,200 in nuclei (Figure 2D, E; Figure 2—supplement 1E). Thus,

McLaughlin et al.

154 including intronic reads in snRNA-seq data provides additional information that is not captured by exonic  
155 reads alone.

156

157 We next assessed gene expression variability between cells and nuclei. Changes in gene expression  
158 between cells can arise from biological factors, such as differences in transcription rate or cell state, or  
159 are the result of technical artifacts leading to missed gene detection or “gene dropouts” (Li & Xie, 2011;  
160 Munsky et al., 2012; Little et al., 2013). We evaluated expression of the five neuronal markers used for  
161 quality filtering of cells and nuclei (*elav*, *CadN*, *Syt1*, *brp*, *nSyb*) and house-keeping genes (*cpo*, *Atpα*,  
162 *hsr-α*) to determine the contribution of gene dropouts to expression variability. The majority of genes we  
163 evaluated showed similar expression in both ORN and PN cells and nuclei (Figure 2F–J). However, we  
164 did notice that some genes, namely *nSyb* and *brp*, had a higher dropout rate in 24h nuclei compared to  
165 cells at the same stage (Figure 2F, G), a finding that is in line with a previous report in mammalian  
166 neurons (Bakken et al., 2018). These results indicate that gene dropouts likely do not contribute to  
167 considerable expression differences between cell and nuclear transcriptomes.

168

169 Next, we evaluated the extent to which snRNA-seq and scRNA-seq can detect similar genes. We first  
170 assayed the 20 highest expressed genes by percentage of total reads and found that stage-matched  
171 cells and nuclei share a subset of the same highly expressed genes (Figure 2—supplement 1F vs. G, I  
172 vs. J). As expected, we found that ORN and PN cells show higher detection of mitochondrial transcripts  
173 than nuclei, with the exception of adult ORN nuclei which express some mitochondrial transcripts likely  
174 resulting from dissociation artifacts (Figure 2—supplement 1H). Second, we compared the total genes  
175 detected in cells and nuclei. We observe that 71% of genes detected in ORN cells were found in nuclei,  
176 and 93% of nuclear genes were detected in cells (Figure 2K). Likewise, 80% of genes detected in PN  
177 cells were detected in their nuclear counterparts, and 94% of genes detected in PN nuclei were in cells  
178 (Figure 2L), indicating that snRNA-seq can detect similar genes to scRNA-seq. Finally, we queried the  
179 types of genes that were differentially expressed between cells and nuclei by performing gene ontology  
180 (GO) analysis between stage-matched cell and nuclear transcriptomes (The Gene Ontology Consortium,  
181 2000). Based on studies in other species (Bakken et al., 2018; Deeke & Gagnon-Bartsch, 2020), we  
182 predicted that cells would be enriched for genes with house-keeping functions, probably resulting from  
183 preferential cytoplasmic mRNA stability. Indeed, cellular transcriptomes were enriched for genes in GO  
184 categories such as translation, protein folding, and metabolic processes, whereas nuclear transcriptomes  
185 contained terms related to stage-specific processes, e.g., neuron differentiation, when compared to cells  
186 (Figure 2—supplement 1K, L). Most of the stage-specific genes were also expressed in ORN cells, albeit  
187 at slightly reduced levels relative to nuclei (Figure 2—supplement 1N, last column), indicating that our  
188 snRNA-seq and scRNA-seq protocols detect mostly overlapping genes. RNAs expressed from the  
189 mitochondrial genome were enriched in ORN cells, whereas long non-coding RNAs were enriched in  
190 nuclei (Figure 2—supplement 1M, N).

191

192 Finally, we asked if snRNA-seq could reveal transcriptomic changes associated with neuronal maturation.  
193 Thus, we computed the differentially expressed genes between nuclei at 24h APF and the adult stage  
194 and identified GO terms for each timepoint. 24h APF transcriptomes were enriched for terms that describe  
195 axon and tissue development, cell adhesion, and cell recognition (Figure 2M, N). Adult specific-genes,  
196 on the other hand, were involved in processes like signaling, cell communication, and chemosensory  
197 behavior (Figure 2M, N). These results indicate that as ORNs mature, there is a switch in expression  
198 from genes important for axon guidance and circuit formation to genes that mediate neuronal signaling  
199 and odorant detection. Altogether, our snRNA-seq protocol can robustly and reliably profile developing  
200 and adult neurons.

201

202 **Individual ORNs maintain the expression of the same olfactory receptor(s) throughout**  
203 **development**

McLaughlin et al.

204 ORNs use three distinct families of olfactory receptors to detect odorants: Ors (odorant receptors), Irs  
205 (ionotropic receptors), and Grs (gustatory receptors) (Clyne et al., 1999; Vosshall et al., 1999; Scott et  
206 al., 2001; Benton et al., 2009). Olfactory receptor genes are gradually turned on in the pupal stage and  
207 by the time they reach adulthood each neuron type expresses one or few specific receptor(s) (Figure  
208 3A). Olfactory receptors can, therefore, serve as excellent ORN type-specific markers. In the mouse  
209 olfactory system, an immature ORN can express several olfactory receptors before selecting the one  
210 whose expression will be maintained in the mature cell (Hanchate et al., 2015; Tan et al., 2015). Olfactory  
211 receptor expression has not been thoroughly evaluated in *Drosophila* ORNs during development. Thus,  
212 we examined this issue more closely.

213  
214 Our scRNA-seq data indicated that some ORNs began to express Ors at 24h APF (Figure 4C), and by  
215 42h APF roughly one-third of ORNs express these receptors (Figure 3B, C). Of the 298 Or-expressing  
216 ORNs at 42h APF, 84% (251 cells) express only one receptor and 16% (47 cells) express two or three  
217 (Figure 3B, C). Some ORN types are known to express more than one Or (e.g., Or19a/b and Or65a/b/c).  
218 Prior to this study *Or85c* was thought to be expressed in the larval olfactory system (Kreher et al., 2005),  
219 but we detect co-expression of *Or85c* with *Or85b* in 4% (12 cells) of Or-expressing ORNs (Figure 3C).  
220 All other co-expressed Ors appeared to be randomly paired (Figure 3C). Low-frequency co-expression  
221 could be accidental or be the result of doublet sequencing, an infrequent event whereby the  
222 transcriptomes of two cells are inadvertently combined during sample processing or sequencing (Ilicic et  
223 al., 2016). We conclude that the majority of developing ORNs express only one Or gene.

224  
225 Do ORNs maintain expression of the same Or from the pupal to adult stage? To address this question,  
226 we employed a permanent genetic labeling strategy, which allowed us to label the membrane and trace  
227 the glomerular projection of any ORN that has expressed a specific *Or-GAL4* at any time. Specifically,  
228 we used an *Or-GAL4* to drive *UAS-FLP* to excise the STOP cassette between the ubiquitous *actin5C*  
229 promoter and *GAL4* transcriptional activator, such that any cell that transiently expresses the *Or-GAL4*  
230 will be labeled. *Or-GAL4* driving expression of *UAS-mCD8-GFP* served as the “standard labeling” control.  
231 We tested *GAL4* lines of three highly expressed Ors at 42h APF: *Or42b*, *Or43b*, and *Or47b* using both  
232 labeling methods (Figure 3—supplement 1A). In the majority of cases, permanently labeled ORN axons  
233 projected to the same glomerulus as the standard labeled controls (Figure 3D–G, Figure 3—supplement  
234 1B–D’), indicating that these Ors were not expressed in multiple ORN types during development.  
235 Therefore, *Drosophila* and mouse ORNs appear to use different strategies for selecting specific olfactory  
236 receptor expression (Figure 3H).

237  
238 The finding that olfactory receptor expression is stably maintained across development in *Drosophila*  
239 enabled us to use cluster-specific receptor expression to match transcriptomic clusters of developing  
240 ORNs to their respective ORN types, which also corresponds to the glomerulus their axons innervate  
241 (Couto et al., 2005; Fishilevich & Vosshall, 2005; Silbering et al., 2011).

### 242 243 **Mapping 24h APF transcriptomic clusters to their glomerular types**

244 We next investigated the individual features of ORN transcriptomes at the two newly profiled stages. We  
245 started with 24h APF. When we visualized 24h APF transcriptomes in the t-SNE space (van der Maaten  
246 & Hinton, 2008) following dimensionality reduction with 500 over-dispersed genes from this stage, 24h  
247 APF transcriptomes separated into three distinct groups instead of forming clusters corresponding to  
248 each neuron type (Figure 4—supplement 1A). Upon querying expression of transcripts known to be  
249 expressed in ORNs such as *acj6*, a transcription factor that is ubiquitously expressed at 42h APF (Li et  
250 al., 2020), we found that *acj6* was enriched in the largest cluster but was absent from the other two  
251 clusters (Figure 4—supplement 1B). We asked if Acj6 protein reflected its transcript expression in the  
252 24h APF antenna by co-immunolabeling with Acj6 and the pan-neuronal marker Elav. Given Acj6’s role  
253 in ORN axon targeting and olfactory receptor expression (Clyne et al., 1999a; Komiyama et al., 2004; Li  
254 et al., 2020) it could be turned on at a later stage of ORN maturation than Elav. Indeed, some neurons in

McLaughlin et al.

255 the third antennal segment were *Acj6*-negative, and *Acj6* was absent from the second antennal segment,  
256 which contains auditory neurons (Figure 4—supplement 1C). We assayed if either of the *acj6*-negative  
257 clusters could represent auditory neurons. Accordingly, the small *acj6*-negative cluster contained  
258 hearing-related genes (e.g., *iav*) (Senthilan et al., 2012) and GO terms, indicating that this cluster contains  
259 auditory neurons (Figure 4—supplement 1B, D–F). We performed identical analyses on the large cluster  
260 of *acj6*-negative cells and found that it contained genes/GO terms relating to neurogenesis, cell  
261 component biogenesis, and sensory organ development, whereas neurite development and cell signaling  
262 were found in *acj6*-positive cells (Figure 4—supplement 1F, G). Although all ORNs are born during the  
263 pupal stage, the precise time when their generation ceases is unknown (Endo et al., 2007; Barish &  
264 Volkan, 2015; Li et al., 2018). Thus, it is possible that we captured two distinct developmental states of  
265 ORNs with the large *acj6*-negative cluster being less mature than the *acj6*-positive cells.

266  
267 Next, we sought to map 24h APF transcriptomes to their respective glomerular types (Figure 4A). We  
268 focused on the putatively more mature *acj6*-positive ORNs and began by identifying a gene set for  
269 dimensionality reduction that would enable us to obtain high-resolution separation of these cells. In the  
270 companion manuscript that analyzed single-cell transcriptomes of PNs (Xie et al.), we showed that using  
271 differentially expressed genes from the stage with maximal transcriptional diversity between different cell  
272 types for dimensionality reduction achieved the best clustering results. For the three stages of ORNs that  
273 we profiled, we found that transcriptomes at 42h APF exhibited highest diversity (Figure 4—supplement  
274 2A). We therefore used differentially expressed genes from 42h APF ORNs in combination with known  
275 antennal olfactory receptors (Grabe et al., 2016) as the gene set for dimensionality reduction, and  
276 obtained clear separation of the *acj6*-positive 24h APF transcriptomes (hereafter 24h APF ORNs) when  
277 embedded in the UMAP space (McInnes et al., 2018) (Figure 4B). Neither sequencing batch nor  
278 sequencing depth drove clustering (Figure 4—supplement 2B, C).

279  
280 We used the recently developed method, meta-learned representations for single cell (MARS) to cluster  
281 24h APF ORNs (Brbic et al., 2020). MARS groups cells according to their cell types using a deep neural  
282 network to learn a set of cell-type specific landmarks and embedding function to project cells into a latent  
283 low-dimensional space. MARS segregates 24h APF transcriptomes into 36 distinct clusters (Figure 4—  
284 supplement 2D), which corresponded well with clusters identified by the density-based HDBSCAN  
285 approach (Campello et al., 2013). However, MARS separated closely related clusters that represent  
286 multiple ORN types better than HDBSCAN (Figure 4—supplement 2D, E). In fact, MARS was able to  
287 separate two clusters, VM5d and VM5v (Figure 4—supplement 2F), in our 42h APF data that were  
288 previously indistinguishable (Li et al., 2020). Thus, we used MARS to cluster and annotate 24h APF  
289 ORNs.

290  
291 We first asked if we could detect expression of any olfactory receptors at 24h APF, as receptor expression  
292 in a single cluster would enable us to immediately identify the glomerular type the cluster represents. We  
293 observed expression of a small subset of receptors at 24h APF (Figure 4C). Cluster-specific expression  
294 of six of these receptors allowed us to annotate clusters corresponding to V (*Gr21a*), DM1 (*Or42b*), VL1  
295 (*Ir75d*), DL4 (*Or85f*), VA1v (*Or47b*), and DM3 (*Or47a*) neuron types (Figure 4D–G, Figure 4—supplement  
296 3A, B, D).

297  
298 We next used marker genes to match additional 24h APF clusters with their corresponding 42h APF  
299 clusters. To annotate 42h APF clusters, we identified cluster-specific markers and used *GAL4* lines for  
300 each gene to validate that neurons expressing each marker targeted in the correctly annotated  
301 glomerulus (Li et al., 2020). Since axons at 24h APF have not reached their final glomerular positions,  
302 we could not perform similar analyses at this stage. Instead, we asked if cluster-specific markers from  
303 42h APF displayed comparable expression at 24h APF and could be used to annotate clusters at this  
304 earlier stage. Demonstrating the feasibility of this strategy, *fkh* was expressed in neurons projecting to  
305 the V glomerulus at both 24h and 42h APF (Figure 4E, F, Figure 4—supplement 2F) (Li et al., 2020). We

McLaughlin et al.

306 identified a set of 19 additional marker genes whose individual or combinatorial expression was sufficient  
307 to map ORNs at 24h APF to their respective 42h APF clusters (Figure 4F, Figure 4—supplement 2F).  
308 Using this approach, we decoded the glomerular identity of an additional 11 ORN types (Figure 4G, H,  
309 Figure 4—supplement 3). Two of these ORN types, VM5d and VM5v, mapped to a single cluster at 24h  
310 APF (Figure 4G), indicating that these cells are highly similar at this stage. Collectively, we mapped 16  
311 transcriptomic clusters to 17 neuron types at 24h APF using olfactory receptor and marker gene  
312 expression. Additional clusters were mapped to neuronal types by matching transcriptomic clusters  
313 across development (see Figure 6).

### 314 315 **Mapping adult transcriptomic clusters to their glomerular types**

316 The adult antenna is covered in hair-like projections called olfactory sensilla and has a large feather-like  
317 protrusion known as the arista (Figure 5A). Individual antennal ORN types are housed in one of four  
318 sensillar classes (see Figure 7A). Each individual sensillum comprises 1–4 ORNs and a few accessory  
319 cells that are all derived from a common progenitor (Figure 5A') (Endo et al., 2012). The arista contains  
320 sensory neurons that express *Irs* and *Grs* and project their axons into the antennal lobe (Ni et al., 2013;  
321 Enjin et al., 2016). Unlike some pupal sensory neurons, all adult ORNs should express their type-specific  
322 receptor(s), enabling us to definitively map adult clusters to their glomerular type (Figure 5B). We  
323 observed that 75% of antennal sensory receptors are highly expressed in adult transcriptomes and 84%  
324 of adult neurons express at least one sensory receptor (Figure 5C). Dropouts and low-level receptor  
325 expression likely account for the 16% of neurons where we could not detect a receptor.

326  
327 We performed dimensionality reduction using the differentially expressed gene set from 42h APF in  
328 combination with antennal olfactory receptors and visualized adult ORN transcriptomes in the UMAP  
329 space. ORN transcriptomes were initially divided into 27 clusters; however, we removed a cluster that  
330 appeared to contain auditory neurons, leaving us with a total of 26 clusters (Figure 5D; Figure 5—  
331 supplement 1A, B). Similar to 24h APF, MARS out-performed density-based clustering of adult ORNs  
332 (Figure 5—supplement 1E, F). Though our adult transcriptomes included nuclei labeled with both *unc84-  
333 GFP* and *lam-GFP*, neither batch effects nor sequencing depth drove clustering (Figure 5—supplement  
334 1C, D). Finally, the majority of adult cells expressed select odorant binding proteins (Obps) (Figure 5—  
335 supplement 1G, H), which are thought to be predominantly expressed in and secreted by accessory cells  
336 within a sensillum (Figure 5A') (Hekmat-Safe et al., 2002; Larter et al., 2016).

337  
338 Do adult transcriptomic clusters represent distinct neuron types? We began by evaluating expression of  
339 all known antennal sensory receptors. We observed cluster-specific expression of many *Ors* and *Grs* in  
340 our data (Figure 5E–G, Figure 5—supplement 2). For instance, *Or13a* (the receptor that DC2-projecting  
341 ORNs express) was found in a single cluster (Figure 5E). We could also detect all of the known receptors  
342 for V (*Gr21a/Gr63a*), DL3 (*Or65a/b/c*), DC1 (*Or19a/b*), and DM2 (*Or22a/b*) ORN types (Figure 5E, F,  
343 Figure 5—supplement 2B, C, J), each of which expresses more than one receptor. Thus, cluster-specific  
344 *Or* and *Gr* expression allowed us to match 13 transcriptomic clusters with their glomerular types (Figure  
345 5G, H).

346  
347 In two instances, *Ors* from multiple ORN types were present in a single cluster. First, we detected  
348 expression of *Or49b* (VA5 ORNs) in a distinct set of cells within the larger *Or9a* (VM3 ORNs) cluster  
349 (Figure 5G; Figure 5—supplement 2A). Thus, we annotated this cluster as containing both VM3 and VA5  
350 ORN types. Likewise, *Ors* for DM3 (*Or47a*), VA6 (*Or82a*), and DC3 (*Or83c*) ORNs were found in non-  
351 overlapping subsets of cells in a single cluster (Figure 5—supplement 2K). Again, since all three of these  
352 *Ors* were expressed in a distinct portion of cells, we annotated this cluster as representing all three ORN  
353 types. We note that in both examples, with the exception of DC3 ORNs, the intermingled ORNs originated  
354 from the same sensillar class (Couto et al, 2005). These findings suggest that the transcriptomes of some  
355 ORNs within the same sensillar class are indistinguishable at the adult stage, which likely contributed to  
356 why we had 26 adult neuron clusters rather than ~50.

McLaughlin et al.

357 We next focused on annotating Ir-expressing clusters. Irs mediate detection of olfactory, humidity, and  
358 thermosensory cues (Enjin et al., 2016; Knecht et al., 2017; Budelli et al., 2019). Ir expression is more  
359 promiscuous than that of Ors and Grs, as individual Irs can be found in multiple neuron types in the  
360 antenna and arista (Grabe et al., 2016; Marin et al., 2020). It was therefore challenging to annotate Ir-  
361 positive clusters as belonging to just one neuron type. For instance, *Ir21a*—known to be expressed in  
362 neurons projecting from the antenna and arista to the VP1I and VP3 glomeruli, respectively (Marin et al.,  
363 2020)—was largely localized to a single cluster (Figure 5G, Figure 5—supplement 2P). Likewise, *Ir40a*—  
364 known to be in neurons targeting to the VP4 and VP1d glomeruli (Marin et al., 2020)—was also enriched  
365 in one cluster (Figure 5G, Figure 5—supplement 2O). A few cells within the *Ir40a* cluster expressed the  
366 arista-specific *Gr28b* (VP2-projecting neurons), indicating that this cluster contained both arista and  
367 antennal neurons (Figure 5—supplement 2P). Also, a single cluster expressed *Ir75a/b/c* and *Or35a*  
368 (Figure 5G, Figure 5—supplement 2M), which corresponds to DP1I, DL2d/v, and VC3 ORNs that  
369 originate from the same sensillar class (Grabe et al., 2016). Lastly, *Ir75d* (VL1) and *Ir92a* (VM1) ORNs,  
370 which are present in the same sensillum (Martin et al., 2013), were found within the same cluster (Figure  
371 5G, Figure 5—supplement 2N). Collectively, we used cluster-specific receptor expression to map 31  
372 antennal sensory neuron types to 20 adult transcriptomic clusters (Figure 5G–I).

373

### 374 **Matching transcriptomic clusters across all stages enabled annotation of additional ORN types**

375 In addition to the 22 annotated ORN types from our prior 42h APF study (Li et al., 2020), we mapped 17  
376 and 31 neuron types to their corresponding 24h APF and adult transcriptomic clusters, respectively  
377 (Figure 4G, 5H). When we performed dimensionality reduction using differentially expressed genes from  
378 42h APF and olfactory receptors and visualized neurons of all stages together, we noticed that the  
379 transcriptomes readily separated into clusters corresponding to distinct ORN types (Figure 6A, B). The  
380 fact that this gene set can accurately differentiate ORNs at all stages indicates that it contains relevant  
381 ORN type-specific information. Denoting a high degree of transcriptomic similarity, cells belonging to the  
382 same ORN type at 24h and 42h APF predominantly clustered together, whereas adult transcriptomes  
383 remained distinct (Figure 6A, B). Differences in either sequencing technology or transcriptome similarity  
384 could be the reason adult transcriptomes do not intermingle with pupal ones.

385

386 We next wanted to leverage the similarity between 24h and 42h ORNs, as well as the fact that we have  
387 annotated different neuron types between pupal and adult stages, to decode additional clusters at each  
388 time point. Since we already employed a manual matching strategy (using marker genes/olfactory  
389 receptor expression), we asked if an automatic matching approach that uses transcriptomic similarity to  
390 link clusters across development could annotate more clusters (Figure 6C). Thus, we identified  
391 differentially expressed genes in each cluster at the 24h APF, 42h APF, and adult stages. Each cluster  
392 at one stage was independently compared to every cluster at the other time points. We then computed a  
393 similarity score (Jaccard index) for the proportion of genes shared between each pair of clusters across  
394 two stages. If two clusters both had the highest similarity score with each other, we considered these  
395 clusters to be two-way matched (Figure 6C). One-way matches occurred when one cluster has the  
396 highest similarity with a cluster at a different stage, but the opposite did not hold true (Figure 6C, see  
397 Methods). Due to the difference in sequencing technologies between pupal and adult ORNs, we did not  
398 allow one-way matches between these stages.

399

400 We first used this approach to validate our manual matches and found that the results of these two  
401 strategies were in complete agreement (Figure 6D). There were certain clusters (e.g., DA4I or VM3) that  
402 we were only able to match using one of the strategies (Figure 6D). Can two-way automatic matching  
403 allow annotations of additional neuron types that we were unable to link previously? Indeed, this approach  
404 matched 6 more clusters from 24h to 42h APF. Two of these clusters corresponded to DM4 and VM3  
405 ORNs and four were unannotated (Figure 6B, D, Figure 6—supplement 1A, C). Furthermore, we  
406 annotated the pupal DL5 clusters by matching them to the previously annotated adult DL5 cluster (Figure  
407 6D). For other 42h APF clusters that mapped on to adult clusters containing multiple ORN types, we



McLaughlin et al.

408 annotated the adult clusters with the name of the 42h cluster it matched to but noted when there were  
409 multiple ORN types within it (Figure 6D, brackets). Lastly, we relied on one-way automatic matching to  
410 decode DC3 and DM2 ORNs at 24h APF (Figure 6D) and to link two unannotated types between 24h  
411 and 42h APF (Figure 6—supplement 1C). Automatic matching was thus able to decode an additional five  
412 transcriptomic clusters at 24h APF and one additional cluster at 42h APF, bringing the total number of  
413 annotated clusters at each stage to 21 and 23, respectively. Altogether, by combining manual and  
414 automatic approaches, we matched 17 ORN types across all developmental stages.

415

#### 416 **ORN transcriptomes in part reflect axon trajectory at 24h APF and sensory modality in adults**

417 Antennal ORNs are located in one of four morphologically distinct sensillar classes: antennal trichoids,  
418 antennal coeloconics, large basiconics, and thin/small basiconics (Figure 7A). Thermo- and hygrosensory  
419 neurons are found within the sacculus, a three chambered invagination within the antenna, and the arista  
420 (Figure 7B) (Enjin et al., 2016; Budelli et al., 2019). Generally, antennal sensory neurons that are found  
421 in the same structure (e.g., sensillar class), project their axons to adjacent regions in the antennal lobe,  
422 and detect similar stimuli. Since we annotated neurons in each of these sensory structures and matched  
423 ORN transcriptomes from each sensillar class across development (Figure 7C, D), we next sought to  
424 determine the stage-specific transcriptomic features of neurons in each of these groups.

425

426 We started by measuring cluster-level transcriptomic similarity of matched ORNs within each sensillar  
427 class at all stages. (We could not evaluate coeloconic transcriptomes, since we only matched two ORN  
428 types within this class.) We found that within each sensillar class, peak cluster-level similarity occurred  
429 at different stages (Figure 7E–G). For instance, members of the trichoid class had most the different  
430 transcriptomes in adults (Figure 7E). The diversity of signals that different trichoid ORN types respond  
431 to, including various pheromones and fruit cues (Kurtovic et al., 2007; Dweck et al., 2013, 2015), could  
432 contribute to why these cells have more diverse transcriptomes at this stage. Both basiconic sensillar  
433 classes peaked in similarity in the adult stage and were most diverse at 42h APF (Figure 7F, G). In line  
434 with this, basiconic clusters contained multiple ORN types at the adult stage (Figure 5H). Removing V  
435 neurons, which are distinct in their axon projection pattern and physiological responses (they use Grs as  
436 receptors to detect carbon dioxide; Couto et al., 2005; Kwon et al., 2007), did not change the results of  
437 the large basiconic comparisons (Figure 7—supplement 1A). With the exception of V neurons, all of the  
438 basiconic ORNs we analyzed respond to fruit-related odorants (Semmelhack & Wang, 2009; Dweck et  
439 al., 2018), suggesting that transcriptomic similarity is highest between ORNs with similar functions (Figure  
440 7H). Collectively, ORNs within each sensillar class exhibit highest molecular diversity at distinct  
441 developmental stages.

442

443 Next, we probed the relationship between transcriptome, sensillar class, and stage-related biological  
444 processes of neurons at each time point. Previously, we found that 42h APF ORN transcriptomic similarity  
445 reflects sensillar class (Li et al., 2020). Thus, we performed hierarchical clustering of all annotated neuron  
446 types that mapped to a single sensillar class at 24h APF. Overall, ORNs that belong to the same sensillar  
447 class share more similar transcriptomes than those from other classes (Figure 7I). Yet, neither V nor DL4  
448 neurons clustered with their sensillar classes. We therefore considered other factors that could contribute  
449 to the clustering of these two ORN types. At 24h APF, most ORN axons are taking either a dorsolateral  
450 or ventromedial trajectory around the antennal lobe (Endo et al., 2007; Joo et al., 2013). Could axon  
451 trajectory account for the clustering of DL4 and V transcriptomes? Indeed, DL4 ORNs were more similar  
452 to the antennal trichoids that take a dorsolateral trajectory than to the ventromedially projecting basiconics  
453 annotated here (Figure 7I). Both V neurons and the coeloconics they clustered with project their axons  
454 to more posterior glomeruli than the majority of ORNs in trichoid and basiconic classes (Couto et al.,  
455 2005; Rybak et al., 2016) (Figure 7I). Posteriorly projecting transcriptomes further segregated based on  
456 axon trajectory, as ORNs whose axons take the ventromedial path were more similar to each other than  
457 to those taking the dorsolateral trajectory. Further, V and VL1 ORNs have the most divergent  
458 transcriptomes of the posteriorly projecting ORNs (Figure 7I), which could reflect the fact that these

McLaughlin et al.

459 neurons project their axons ipsilaterally to one antennal lobe and not bilaterally to both lobes, like all the  
460 other ORNs in the dendrogram (Couto et al., 2005; Silbering et al., 2011). Moreover, cell surface  
461 molecules and transcription factors are important regulators of axon targeting and they constituted 14%  
462 and 25% (as opposed to ~6% each in the genome) of the differentially expressed genes used to cluster  
463 ORN transcriptomes, respectively (Figure 7—supplement 1B–C). These data suggest that 24h APF ORN  
464 transcriptomes reflect similarities in axon trajectory in addition to sensillar class.

465  
466 In our adult data, we annotated ORNs, thermosensory neurons, and hygrosensory neurons, enabling us  
467 to assess the relationship between multiple antennal sensory neuron types at the transcriptome-level.  
468 Similar to the pupal stages, neurons within the same sensory structures shared more similar  
469 transcriptomes (Figure 7J, Figure 7—supplement 2). Upon closer look, we noticed that adult  
470 transcriptomes also reflected the type of stimuli they detect. DC1 ORNs from the trichoid at3 sensillum,  
471 for instance, sense limonene (Dweck et al., 2013) and their transcriptomes were more similar to fruit  
472 odor-responsive basiconic ORNs than to the pheromone-detecting trichoid ORNs (Figure 7H, J). In fact,  
473 DC1 transcriptomes were most similar to D ORNs which can also respond to limonene. Within the *Ir*-  
474 expressing clade, neurons appeared to group by the stimuli they respond to. For example, acid-sensing  
475 neurons in the coeloconic sensilla were more closely related to sacculus neurons detecting the same  
476 type of stimulus than to amine-sensing coeloconics (Figure 7H, J). Further indicating transcriptomic  
477 similarity could reflect sensory modality, the thermo- and hygrosensory neurons in the sacculus and arista  
478 were most similar to each other (Figure 7J) and in some cases inseparable at the cluster level (Figure  
479 5H). Taken together, our data suggest that antennal neuron transcriptomic similarities in part reflect  
480 stage-related biological processes.

481

#### 482 **Transcriptomic differences between Or-expressing and Ir-expressing neurons**

483 Obtaining adult single-cell transcriptomes enabled us to explore gene expression differences between  
484 distinct types of antennal sensory neurons. We began by classifying these neurons based on the two  
485 major classes of sensory receptors they express: Ors and Irs. Ors are used to detect odorants, whereas  
486 Irs can respond to odorants, temperature, and humidity (Hallem & Carlson, 2006; Silbering et al., 2011;  
487 Knecht et al., 2016, 2017; Ni et al., 2016). Despite having seven transmembrane domains, insect Ors are  
488 not G-protein-coupled receptors (GPCRs) but instead adopt an inverse seven-transmembrane topology  
489 with an intracellular amino-terminal domain and an extracellular carboxy-terminal domain (Figure 8A)  
490 (Benton et al., 2006). Ors assemble into heterotetramers with their obligate co-receptor, Orco, to form  
491 non-selective, ligand-gated cation channels (Butterwick et al., 2018). In our adult transcriptomes, 69% of  
492 neurons express *Orco* (Figure 8B, Figure 8—supplement 1A). Irs are glutamate insensitive relatives of  
493 ionotropic glutamate receptors (iGluRs) and are proposed to exist as heterotetrameric cation channels  
494 with their co-receptors (Figure 8A) (Abuin et al., 2019). Expression of the *Ir8a* and *Ir76b* co-receptors was  
495 restricted to Ir-positive clusters, whereas the *Ir25a* and *Ir93a* co-receptors were expressed in both Or-  
496 and Ir-positive neurons in our data (Figure 8C).

497

498 Aside from the receptors and co-receptors, little is known about signaling mechanisms that distinguish  
499 Or- and Ir-expressing neurons. To examine this, we identified 262 differentially expressed genes ( $p < 10^{-5}$ )  
500 between Or- and Ir-positive neurons (Figure 8—supplement 1B). Although both Irs and Ors are cation  
501 channels, we observed differential expression of genes associated with GPCR signaling cascades  
502 between these two groups. For instance, Ir-positive neurons preferentially expressed a specific gamma  
503 subunit of the heterotrimeric G-protein complex *Ggamma30A*, the calmodulin binding protein *igl*, and the  
504 cyclic nucleotide-gated channel subunit *Cngl* (Figure 8D). The adenylyl cyclase *Ac76E*, which belongs to  
505 a class of enzymes that often acts downstream of GPCRs, was enriched in Or-positive ORNs (Figure  
506 8E). Additionally, the catalytic subunit of the cAMP-dependent protein kinase, *PKA-C1*, was expressed  
507 in both Or- and Ir-positive neurons (Figure 8E). The function of G-protein, cyclic nucleotide, and  
508 calmodulin signaling in ORNs is unclear, as some studies find that Or-positive ORNs utilize them for  
509 signaling (Wicher et al., 2008) but others report that they do not (Kain et al., 2008; Yao & Carlson, 2010).

McLaughlin et al.

510 Additionally, whether Irs engage these signaling mechanisms is unknown. Our data suggest that both  
511 Or- and Ir-expressing neurons may utilize distinct components of GPCR signaling.

512  
513 GPCR signaling could be employed by neuromodulators or neurotransmitters that use GPCRs as  
514 receptors. ORNs not only synapse with PN dendrites, but are also contacted by interneurons of various  
515 neurotransmitter profiles whose signaling could engage distinct GPCRs on ORN terminals (Olsen et al.,  
516 2007; Roy et al., 2007; Shang et al., 2007; Chou et al., 2010). We found that the serotonin receptor 5-  
517 *HT2B* had higher expression in Or-positive clusters compared to Ir-positive clusters (Figure 8E). By  
518 contrast, 5-*HT1A* was expressed in a subset of Ir-positive clusters (Figure 8—supplement 1B). Given that  
519 5-HT2B promotes excitability whereas 5-HT1A reduces it (Tierney, 2018), these data suggest that  
520 serotonin could have differential effects on Ir- and Or- expressing neurons.

521  
522 **Differential expression of ion channels, neurotransmitter receptors, and neuropeptides among**  
523 **distinct sensory neuron types**

524 Finally, we investigated the expression of genes that regulate neuronal excitability and synaptic  
525 transmission among different sensory neuron types. First, we queried expression of neuropeptides. Short  
526 neuropeptide F precursor (*sNPF*), which regulates olfactory sensitivity of DM1 ORNs (Root et al., 2011),  
527 was found in all adult clusters but was more highly expressed by Ir-positive neurons (Figure 9A). Ion  
528 transport peptide (*ITP*) displayed expression in a few Or-positive clusters (Figure 9A). Next, we assayed  
529 expression of GPCRs that serve as neurotransmitter, hormone, and neuropeptide receptors. Many of  
530 these receptors had broad expression in multiple neuron types, such as the dopamine receptor  
531 (*Dop1R1*), octopamine receptors (*Octβ3R*, *Octβ1R*), neuropeptide receptor (*TrissinR*), metabotropic  
532 GABA receptor (*GABA-B-R1*), dopamine/ecdysteroid receptor (*DopEcR*), and muscarinic acetylcholine  
533 receptor (*mAChR-B*) (Figure 9A). Expression of other GPCRs was restricted to a subset of clusters, such  
534 as the short neuropeptide F receptor (*sNPF-R*), octopamine receptor (*Octβ2R*), allatostatin C receptor 2  
535 (*AstC-R2*), and sex peptide receptor (*SPR*) (Figure 9A). Furthermore, the diuretic hormone receptors,  
536 *Dh44-R1* and *Dh31-R*, were mainly expressed by pheromone-detecting DA1 and DA1/DL3 ORNs,  
537 respectively (Figure 9A). These data indicate that ORNs express a breadth of GPCRs and may be  
538 modulated by a variety of neurotransmitters and hormones.

539  
540 Next, we determined the expression of additional groups of genes important for neuronal physiology. We  
541 began with ionotropic neurotransmitter receptors and found that two nicotinic acetylcholine receptor  
542 subunits, *nAChRa3* and *nAChRa4*, were broadly expressed in all clusters (Figure 9A). Conversely,  
543 *nAChRa1*, *nAChRa6*, and *nAChRa7* exhibited lower albeit cluster-specific expression in some Ir-positive  
544 cell-types (Figure 9A), indicating that distinct subunits could comprise nicotinic acetylcholine receptors in  
545 these neurons. Finally, we evaluated ion channel and channel subunit expression in adult transcriptomic  
546 clusters. Both pickpocket (*ppk*) and transient receptor potential (*Trp*) channel members showed low but  
547 restricted expression to a few, mostly trichoid clusters (VA1v, VA1d, DL3; Figure 9B). The rest of the  
548 channels and their accessory subunits exhibited broad expression, with the exception of a  $\beta$  subunit of a  
549 voltage-gated sodium channel (*Teh3*), an  $\alpha$  subunit of calcium channel (*Ca- $\alpha$ 1T*), a glutamate-gated  
550 chloride channel  $\alpha$  subunit (*GluCl $\alpha$* ), and the cyclic nucleotide gated ion channel (*Cngl*) (Figure 8D, 9B).  
551 Taken together, these analyses exemplify how our adult transcriptomic data can be used as a foundation  
552 to investigate physiological functions of these sensory neurons.

## 553 554 **Discussion**

555 Here, we generated high-quality transcriptomes of ~3,100 sensory neurons from the *Drosophila* third  
556 antennal segment at 24h APF and in adults. We integrated these data with the transcriptomes of mid-  
557 pupal ORNs (Li et al., 2020). Our clustering methods separated 24h APF and adult transcriptomes into  
558 36 and 26 clusters, respectively, and further divided 42h APF transcriptomes into 34 clusters. Importantly,  
559 we matched 16 annotated ORN types at all three developmental stages. The fact that we observed fewer  
560 clusters than the ~50 glomerular types could be the result of: 1) not enough cells being profiled for some

McLaughlin et al.

561 types; 2) closely related types forming a single cluster (e.g., VM5d and VM5v ORNs at 24h APF or VA5  
562 and VM3 ORNs in adults; Figure 4G, 5H); or 3) some Ir-positive neuronal types expressing the same  
563 receptor and cannot be further subdivided (Figure 5H; Figure 5—supplement 2M, N, P). Our analysis of  
564 sensory receptor and marker expression within clusters points to the latter two explanations accounting  
565 for the majority of the reduction in clusters compared to the number of neuron types. We were also unable  
566 to annotate thermo- and hygro-sensory neurons in our pupal data, possibly because these cells both exist  
567 in low numbers in the antenna and did not express distinguishing receptors in pupal transcriptomes.  
568 Nonetheless, we annotated the majority of clusters at all three stages and found that they represented  
569 anatomically and functionally distinct sensory neuron types.

### 570 571 **Single-nucleus RNA-seq can be used to profile cuticle-associated tissues**

572 Single-cell transcriptomics is a powerful tool for the discovery of novel cell types, revealing subtype  
573 specific markers, and studying gene expression changes underlying cellular development and maturation  
574 (Li, 2020). Adult ORNs, like many insect tissues, are tightly associated with the hardened exoskeleton  
575 and are difficult to isolate using standard cell dissociation protocols. Nuclei, on the other hand, are much  
576 more resistant to mechanical assaults and have been readily profiled using snRNA-seq in multiple  
577 systems (Grindberg et al., 2013; Habib et al., 2016, 2017; Cui et al., 2020; Kobschull et al., 2020; Lau et  
578 al., 2020). snRNA-seq has many advantages including: 1) tissue can be kept in long-term storage at –  
579 80°C prior to extraction (Wu et al., 2019; Ding et al., 2020); 2) snRNAseq reduces cell-type sampling bias  
580 (Denisenko et al., 2020); and 3) nuclei are more easily captured by microfluidics devices than large and/or  
581 fragile cells (Cui et al., 2020; Denisenko et al., 2020). Underscoring the utility of this protocol, high-quality  
582 nuclei can be isolated from frozen tissues which allows researchers studying low-abundance cell types  
583 to collect and freeze a large amount of tissue (over multiple days) to ensure that they have an adequate  
584 number of nuclei for downstream processing and analyses.

585  
586 Here, we directly compared snRNA-seq with scRNA-seq of both peripheral and central neurons: 24h APF  
587 ORNs and adult PNs, respectively. Similar to a previous report in mammalian cortical neurons (Bakken  
588 et al., 2018), we observed a reduction in genes detected in nuclei compared to stage-matched cells.  
589 Including intronic reads in our nuclear transcriptomes increased gene detection rates in both neuron types  
590 (Figure 2—supplement 1 D, E). Critically, we found that our scRNA-seq and snRNA-seq protocols  
591 detected largely overlapping genes (Figure 2K, L). Finally, we showed that this method could be used to  
592 separate closely-related adult transcriptomes (Figure 5). Collectively, we demonstrated that snRNA-seq  
593 is well-suited for profiling previously inaccessible neurons in the adult fly and this protocol can be easily  
594 used by other researchers that want to gain transcriptomic access to their tissue of interest (see protocol  
595 in Methods section).

### 596 597 **ORN transcriptomic similarity reflects multiple biological factors**

598 Understanding the molecular underpinnings of neural circuit formation, maintenance, and function  
599 requires that we can access the transcriptomes of anatomically and functionally distinct neuronal types  
600 at developmentally-relevant stages. Here, we created a dataset that will enable these types of analyses  
601 by profiling *Drosophila* ORNs at stages corresponding to: 1) initial axon pathfinding (24h APF); 2) synaptic  
602 partner matching (42h APF; Li et al., 2020); and 3) sensory function (adult).

603  
604 Cluster-level comparison within each newly profiled stage lead to the discovery that type-specific  
605 transcriptomes reflect multiple biological factors. Initially, the majority of 24h APF ORNs appeared to  
606 reflect their sensillar class; however, neither DL4 nor V neurons fit this pattern (Figure 7I). Rather,  
607 transcriptomes of both DL4 and V projecting neurons were most closely related to ORNs whose axons  
608 take similar trajectories. Future work decoding additional ORN types could enable a more complete  
609 evaluation of the degree to which 24h APF transcriptomes reflect axon trajectory and sensillar class.

610

McLaughlin et al.

611 In our adult data, we annotated olfactory, thermosensory, and hygrosensory neurons originating from all  
612 of the sensory structures of the antenna. Neurons housed within the same structure generally detect  
613 similar stimuli, with a few exceptions (Figure 7H). Thus, when we compared adult transcriptomes we  
614 found that most neurons housed in the same sensory structure were very similar to each other. However,  
615 when we queried the exceptions to this clustering (e.g., DC1 and some coeloconic ORNs) adult  
616 transcriptomes appeared to also reflect similarities in the sensory stimuli they detect (Figure 7J). As an  
617 example, coeloconic neurons that detect acids are more similar to acid detecting sacculus neurons than  
618 to coeloconics that sense amines (Figure 7J). While it is not possible to cleanly separate the stimulus a  
619 neuron type detects from the sensory structure it is housed in, our data suggests that neurons that detect  
620 similar cues may require analogous genes for their function. Together, our 24h APF and adult analyses  
621 revealed that stage-specific transcriptomes reflect multiple factors and underscore that profiling cells at  
622 multiple stages can deepen our understanding of their biology.

623

### 624 **Transcriptomic differences could reveal regulators of adult neuronal function**

625 ORNs employ two main receptor types for the detection of sensory stimuli: Ors and Irs. Both receptor  
626 types are thought to form ion channels with their co-receptors (Butterwick et al., 2018; Abuin et al., 2019).  
627 However, a metabotropic component to Or signaling has been reported (Wicher et al., 2008). In fact, it  
628 has been proposed that Ors are metabotropically-modulated ionotropic receptors; however, the  
629 mechanism by which this occurs is unresolved (Nakagawa & Vosshall, 2009; Gomez-Diaz et al., 2018).  
630 We found that Or- and Ir-positive neurons express distinct components of GPCR and downstream  
631 signaling cascades. Whether these components are used to modulate Or (or Ir) function remains to be  
632 determined.

633

634 GPCR-directed signaling mechanisms could also be activated by receptors for neuromodulators,  
635 neuropeptides, or neurotransmitters. We showed that ORNs express a rich repertoire of neuropeptide,  
636 amine, hormone, and metabotropic GABA receptors, some of which are differentially expressed in distinct  
637 neuron types (Figure 9A). What is the source of the ligands for these GPCRs? Morphologically and  
638 functionally diverse local interneurons send processes to the antennal lobe where they contact ORN  
639 axons and PN dendrites (Chou et al., 2010). While most local interneurons are GABAergic, some are  
640 cholinergic or glutamatergic, and a few are dopaminergic (Olsen et al., 2007; Shang et al., 2007; Chou  
641 et al., 2010). Local interneurons could also signal to ORNs via secreted hormones or neuropeptides.  
642 Furthermore, biogenic amines are known to modulate ORNs in *Drosophila* and other insect species  
643 (Dolzer et al., 2001), and deutero-cerebral neurons and ventral unpaired neurons providing serotonergic  
644 and octopaminergic inputs into the antennal lobe, respectively (Roy et al., 2007; Sinakevitch & Strausfeld,  
645 2006; Zhang & Gaudry, 2016). It has been reported that serotonin from deutero-cerebral neurons does  
646 not directly affect ORNs (Dacks et al., 2009), but whether these cells modulate Ir-positive neurons is not  
647 known. In other insects, both serotonin and octopamine modulate odor-evoked responses and are found  
648 in hemolymph, the fluid bathing all organs including the antenna (Dolzer et al., 2001; Grosmaître et al.,  
649 2001; French et al., 2014; Zhang & Gaudry, 2016). Thus, identifying the subcellular localization of these  
650 aminergic receptors will provide important insight into their function in ORNs.

651

652 In conclusion, by profiling *Drosophila* ORNs at multiple stages, we have generated a rich dataset that  
653 can be used as a foundation to reveal molecular regulators of neuron differentiation, axon targeting,  
654 synapse formation, and sensory function. This work, together our accompanying paper profiling PNs at  
655 multiple stages (Xie et al.), should spur novel and important biological discoveries.

656

McLaughlin et al.

657  
658  
659

## Materials and Methods

### Key Resources Table

| Reagent type (species) or resource         | Designation                   | Source or reference        | Identifiers     | Additional information |
|--------------------------------------------|-------------------------------|----------------------------|-----------------|------------------------|
| Genetic reagent ( <i>D. melanogaster</i> ) | <i>nSyb-GAL4</i>              |                            | RRID:BDSC_51635 |                        |
| Genetic reagent ( <i>D. melanogaster</i> ) | <i>AM29-GAL4</i>              | (Endo et al., 2007)        |                 |                        |
| Genetic reagent ( <i>D. melanogaster</i> ) | <i>elav-GAL4</i>              | (Luo et al., 1994)         |                 |                        |
| Genetic reagent ( <i>D. melanogaster</i> ) | <i>VT033006-GAL4</i>          | (Tirian & Dickson, 2017)   | RRID:BDSC_73333 |                        |
| Genetic reagent ( <i>D. melanogaster</i> ) | <i>UAS-FRTSTOP-FRTmCD8GFP</i> | (Potter et al., 2010)      | RRID:BDSC_30125 |                        |
| Genetic reagent ( <i>D. melanogaster</i> ) | <i>GH146-GAL4</i>             | (Stocker et al., 1997)     | RRID:BDSC_30026 |                        |
| Genetic reagent ( <i>D. melanogaster</i> ) | <i>Act-FRT-STOPFRT-GAL4</i>   | (Pignoni & Zipursky, 1997) |                 |                        |
| Genetic reagent ( <i>D. melanogaster</i> ) | <i>UAS-Flp</i>                | (Duffy et al., 1998)       |                 |                        |
| Genetic reagent ( <i>D. melanogaster</i> ) | <i>ey-FLP</i>                 | (Chotard et al., 2005)     |                 |                        |
| Genetic reagent ( <i>D. melanogaster</i> ) | <i>Or42b-GAL4</i>             |                            | RRID:BDSC_9972  |                        |
| Genetic reagent ( <i>D. melanogaster</i> ) | <i>Or43b-GAL4</i>             |                            | RRID:BDSC_23895 |                        |
| Genetic reagent ( <i>D. melanogaster</i> ) | <i>Or47b-GAL4</i>             |                            | RRID:BDSC_9984  |                        |
| Genetic reagent ( <i>D. melanogaster</i> ) | <i>UAS-lam-GFP</i>            |                            | BDSC_97378      |                        |
| Genetic reagent ( <i>D. melanogaster</i> ) | <i>UAS-unc84-GFP</i>          | (Henry et al., 2012)       |                 |                        |

McLaughlin et al.

|               |                  |                                      |                   |                                                                                                                                               |
|---------------|------------------|--------------------------------------|-------------------|-----------------------------------------------------------------------------------------------------------------------------------------------|
| Antibody      | Rat anti-Ncad    | Developmental Studies Hybridoma Bank | RRID: AB_528121   | (1:40 in 5% normal goat serum)                                                                                                                |
| Antibody      | Chicken anti-GFP | Aves Labs                            | RRID: AB_10000240 | (1:1000 in 5% normal goat serum)                                                                                                              |
| Antibody      | Mouse anti-Acj6  | Developmental Studies Hybridoma Bank | RRID:AB_528067    | (1:40 in 5% normal goat serum)                                                                                                                |
| Antibody      | Rat anti-Elav    | Developmental Studies Hybridoma Bank | RRID:AB_528218    | (1:100 in 5% normal goat serum)                                                                                                               |
| Antibody      | Mouse anti-Elav  | Developmental Studies Hybridoma Bank | RRID:AB_528217    | (1:100 in 5% normal goat serum)                                                                                                               |
| Hoechst-33342 |                  | Invitrogen                           |                   |                                                                                                                                               |
| Software      | ZEN              | Carl Zeiss                           | RRID: SCR_013672  |                                                                                                                                               |
| Software      | Fiji             | National Institutes of Health        | RRID:SCR_002285   |                                                                                                                                               |
| Software      | Illustrator      | Adobe                                | RRID: SCR_010279  |                                                                                                                                               |
| Software      | STAR 2.5.4       | (Dobin et al., 2013)                 | RRID: SCR_015899  | <a href="https://github.com/alexdobin/STAR">https://github.com/alexdobin/STAR</a>                                                             |
| Software      | Htseq 0.11.2     | (Anders et al., 2015)                | RRID: SCR_005514  | <a href="https://github.com/htseq/htseq">https://github.com/htseq/htseq</a>                                                                   |
| Software      | MARS             | (Brbic et al., 2020)                 |                   | <a href="https://github.com/snap-stanford/mars">https://github.com/snap-stanford/mars</a>                                                     |
| Software      | Scanpy           | (Wolf et al., 2018)                  | RRID: SCR_018139  | <a href="https://scanpy.readthedocs.io/en/stable">https://scanpy.readthedocs.io/en/stable</a>                                                 |
| Software      | HDBSCAN          | (McInnes et al., 2017)               |                   | <a href="https://hdbscan.readthedocs.io/en/latest/how_hdbscan_works.html">https://hdbscan.readthedocs.io/en/latest/how_hdbscan_works.html</a> |
| Software      | Flymine          |                                      | RRID:SCR_002694   | <a href="http://www.flymine.org">http://www.flymine.org</a>                                                                                   |
| Software      | Revigo           |                                      | RRID:SCR_005825   | <a href="http://revigo.irb.hr">http://revigo.irb.hr</a>                                                                                       |
| Software      | SciPy            |                                      | RRID:SCR_008058   | <a href="http://www.scipy.org">http://www.scipy.org</a>                                                                                       |
| Software      | NumPy            |                                      | RRID:SCR_008633   | <a href="http://www.numpy.org">http://www.numpy.org</a>                                                                                       |
| Software      | Seaborn          |                                      | RRID:SCR_0018132  | <a href="https://seaborn.pydata.org">https://seaborn.pydata.org</a>                                                                           |
| Software      | Pandas           |                                      | RRID:SCR_0018214  | <a href="https://pandas.pydata.org">https://pandas.pydata.org</a>                                                                             |

McLaughlin et al.

|          |                  |  |                 |                                                                               |
|----------|------------------|--|-----------------|-------------------------------------------------------------------------------|
| Software | Scikit learn     |  |                 | <a href="https://scikit-learn.org/stable">https://scikit-learn.org/stable</a> |
| Software | STRING           |  | RRID:SCR_005223 | <a href="http://string.embl.de">http://string.embl.de</a>                     |
| Software | Cytoscape v3.7.1 |  | RRID:SCR_003032 | <a href="http://cytoscape.org">http://cytoscape.org</a>                       |

660

661

### ***Drosophila* stocks and genotypes**

662

663

664

665

666

667

668

669

670

671

672

673

674

Flies were maintained at 25°C on standard cornmeal medium with at 12-hour light-dark cycle. The following fly lines were used in this study: *nSyb-GAL4* (Bloomington *Drosophila* Stock Center, BDSC #51635); *AM29-GAL4* (Endo et al., 2007); *elav-GAL4* (Luo et al., 1994); *UAS-FRT-STOP-FRT-mCD8-GFP* (Potter et al, 2010); *ey-FLP* (Chotard et al., 2005); *VT033006-GAL4* (Tirian & Dickson, 2017); *Or42b-GAL4* (BDSC #9972); *Or43b-GAL4* (BDSC #23895), *Or47b-GAL4* (BDSC #9984); *GH146-GAL4* (Stocker et al., 1997); *UAS-lam-GFP* (BDSC #97378); *UAS-unc84-GFP* (Henry et al., 2012); *UAS-Flp* (Duffy et al., 1998); *Act-FRT-STOP-FRT-GAL4* (Pignoni & Zipursky, 1997). Note: 48h APF and adult cells/nuclei were labeled with *nSyb-GAL4*; however, this driver was not sufficiently expressed at 24h APF so cells and nuclei from this earlier stage were labeled using *elav-GAL4*. Also, PN cells were labeled with *GH146-GAL4* and nuclei with *VT033006-GAL4*. For the permanent labeling experiments, *Or-GAL4* lines were crossed with permanent labeling ready flies, *UAS-Flp*, *Act-FRT-STOP-FRT-GAL4*, *UAS-CD8-GFP*, and F1 adult brains were dissected and analyzed.

675

### **Immunofluorescence and image acquisition**

676

677

678

679

680

681

682

683

684

685

686

687

688

689

Fly brains and antennae were dissected and labeled according to previously described methods (Wu & Luo, 2006; Li et al., 2020). Briefly, brains and antennae were rapidly dissected in PBS and put into ice cold 4% paraformaldehyde in PBS, washed and permeabilized in PBST (1X PBS, 0.3% Triton-X-100), incubated in blocking buffer (5% normal goat serum in PBST), incubated in primary antibody overnight at 4°C, washed in PBST, and incubated in secondary antibody overnight at 4°C. The following primary antibodies were used in this study: rat anti-Ncad [N-Ex #8; at 1:40; Developmental Studies Hybridoma Bank (DSHB)]; chicken anti-GFP (1:1000; Aves Labs); mouse anti-Elav (9F8A9; 1:100; DSHB); rat anti-Elav (7E8A10; 1:100; DSHB); mouse anti-Acj6 (1:40; DSHB). Secondary antibodies raised in goat or donkey against mouse, rat, or chicken antisera and conjugated to Alexa Fluor 488/594/647 (Jackson ImmunoResearch) were used at 1:200. Tissue was mounted in SlowFade Gold (Thermo Fisher Scientific). 16-bit images were acquired using a 20x Plan-apochromat (0.8 NA) or 40x Flaur (1.3 NA) objective on a Zeiss LSM 780 (Carl Zeiss) using Zen software (Carl Zeiss) and processed with Fiji (ImageJ; National Institutes of Health)

690

### **Single-cell RNA-seq**

691

692

693

694

695

696

697

698

699

700

701

702

Single-cell RNA-seq of *mCD8-GFP* labeled ORNs was performed following the protocol we previously described (Li et al., 2017). Briefly, *Drosophila* third antennal segments labeled with *mCD8-GFP* using specific GAL4 drivers were manually dissected. Single-cell suspensions were then prepared. Individually labeled cells were sorted via fluorescence-activated cell sorting (FACS) into single wells of 384-well plates containing lysis buffer using an SH800 instrument (Sony Biotechnology). Full-length poly(A)-tailed RNA was reverse-transcribed and amplified by PCR following the SMART-seq2 protocol. To increase cDNA yield and detection efficiency, we increased the number of PCR cycles to 25. Primer dimer artifacts were reduced by digesting the reverse-transcribed first-strand cDNA using lambda exonuclease (New England Biolabs) (37°C for 30 min) prior to PCR amplification. Sequencing libraries were prepared from amplified cDNA using tagmentation (Nextera XT). Sequencing was performed using the Novaseq 6000 Sequencing system (Illumina) with 100 paired-end reads and 2 x 12 bp index reads.

703

### **Single-nucleus RNA-seq**



McLaughlin et al.

704 Single-nucleus RNA-seq was performed using the same SMART-seq2 protocol as single-cell RNA-seq  
705 with a few key modifications. First, nuclei are labeled with a fluorescent nuclear marker instead of a  
706 membrane-bound one. Second, the dissociation and single-nucleus suspension protocol varied greatly  
707 from that used for single-cells, detailed below, and was adapted from Krishnaswami et al., 2016. Third,  
708 cDNA was amplified with 28 PCR cycles (instead of 25) and reads were aligned to exons and introns.  
709

710 Single-nucleus suspensions were made using the following protocol:

- 711 1. Cross desired GAL4 lines with UAS-nuclear-GFP. Do not use *UAS-nlsGFP*, because it does not  
712 give a GFP signal after nucleus isolation. We instead use *UAS-unc84-GFP* and *UAS-lam-GFP*.
- 713 2. Dissect tissue in cold Schneider's medium, and use P20 pipet (prior to beginning, coat the tip with  
714 extraneous tissues) to transfer tissue into 100  $\mu$ l Schneider's medium in a nuclease-free 1.5ml  
715 tube on ice. Label the tube clearly using permanent marker. **Note:** for tissues that float in the  
716 medium (e.g., adult antennae), before dissection, prepare three clean dishes: first with 100%  
717 ethanol, second and third with Schneider's medium. Rinse the fly in the first dish with 100%  
718 ethanol for 5 seconds, then rinse the fly in the second dish, and dissect in the third dish.
- 719 3. After dissection, spin samples down using bench top centrifuge.
- 720 4. **Fresh:** The sample can be processed for nuclei extraction immediately following dissection.
- 721 5. **Frozen:** Alternatively, the sample can be flash-frozen for long-term storage. Seal the 1.5 ml EP  
722 tube with parafilm and put into liquid nitrogen for >30s. Immediately store the sample in  $-80^{\circ}\text{C}$   
723 freezer for long-term storage (several months).
- 724 6. Prepare fresh homogenization buffer and keep on ice using the following recipe:  
725

|   | Amount      | Storage                           | Item (add in this order)                   | Final concentration |
|---|-------------|-----------------------------------|--------------------------------------------|---------------------|
| 1 | 10 ml       | RT                                | H <sub>2</sub> O (nuclease free)           |                     |
| 2 | 0.856 g     | RT                                | Sucrose                                    | 250 mM              |
| 3 | 100 $\mu$ l | 4 $^{\circ}$ C                    | 1M Tris pH 8.0                             | 10 $\mu$ M          |
| 4 | 250 $\mu$ l | 4 $^{\circ}$ C                    | 1M KCl                                     | 25 mM               |
| 5 | 50 $\mu$ l  | 4 $^{\circ}$ C                    | 1M MgCl <sub>2</sub>                       | 5 mM                |
| 6 | 100 $\mu$ l | 4 $^{\circ}$ C                    | 10% Triton-X 100                           | 0.1%                |
| 7 | 50 $\mu$ l  | $-20^{\circ}\text{C}$             | RNasin Plus (Promega, N2615)               | 0.5%                |
| 8 | 200 $\mu$ l | $-20^{\circ}\text{C}$<br>aliquots | 50x protease inhibitor<br>(Promega, G6521) | 1x                  |
| 9 | 50 $\mu$ l  | $-20^{\circ}\text{C}$             | 20mM DTT                                   | 0.1 mM              |

- 726
- 727 7. Thaw samples from  $-80^{\circ}\text{C}$  on ice if using frozen samples. Centrifuge samples in 100  $\mu$ l  
728 Schneider's medium using bench top centrifuge, discard medium, and add 100  $\mu$ l homogenization  
~~730~~ buffer.
- 731 8. Optional: if sample pieces are too big, e.g., whole body/head, use pellet pestle motor (Kimble  
6HAZ6) to grind the sample for 30s–60s on ice.
- 732 9. Add 900  $\mu$ l homogenization buffer, and transfer 1000  $\mu$ l homogenized sample into the 1 ml dounce  
733 (Wheaton #357538). Dounce set should be autoclaved at  $200^{\circ}\text{C}$  >5h.
- 734 10. Release nuclei by 20 strokes of loose Dounce pestle and 40 of tight Dounce pestle. Keep on ice.  
735 Avoid bubbles.
- 736 11. Filter 1000  $\mu$ l sample through 5 ml cell strainer (35  $\mu$ m), and then filter sample using 40  $\mu$ m Flowmi  
737 (BelArt #H13680-0040) into 1.5 ml EP tube.
- 738 12. Centrifuge for 10 min at 1000 g at 4 $^{\circ}$ C. Discard the supernatant. Do not disturb the pellet.
- 739 13. Re-suspend the nuclei using desired amount (we normally use 500–1000  $\mu$ l) of 1xPBS/0.5%BSA  
740 with RNase inhibitor (9.5 ml 1x PBS, 0.5 ml 10% BSA, 50  $\mu$ l RNasin Plus). Pipet > 20 times to

McLaughlin et al.

- 741 completely re-suspend the nuclei. Filter sample using 40  $\mu$ m Flowmi into a new 5 ml FACS tube  
742 and keep the tube on ice.
- 743 14. Nuclei are stickier than whole cells. For users making single-nucleus suspension for the first time,  
744 we suggest taking 10  $\mu$ l of the single-nucleus suspension, stain with Hoechst-33342 (Invitrogen),  
745 and check on a cell counter slide to confirm if they are mostly individual nuclei. If nuclei are not  
746 sufficiently dissociated, adjust above steps (e.g., increase the number of strokes of the tight pestle  
747 when releasing nuclei).
- 748 15. Collect nuclei using FACS. Set up the gates using 4 groups of nuclei: WT nuclei, GFP nuclei, WT  
749 nuclei + Hoechst stain, GFP nuclei + Hoechst stain. For different fly tissues, there may be more  
750 than one band of nuclei with varying Hoechst intensities. They represent different cell types with  
751 different nuclei sizes (polyploidy is common for many fly tissues). It is advised to collect different  
752 bands of nuclei and check them under microscope. Collect single nuclei into 384-well plates for  
753 Smart-seq2, or into a tube for 10X Genomics (not used in this study; details can be sent upon  
754 request).

755

### 756 **Sequence alignment and preprocessing**

757 Reads were aligned to the *Drosophila melanogaster* genome (r6.10) using STAR (2.5.4) (Dobin et al.,  
758 2013). Gene counts were produced using HTseq (0.11.2) with default settings except “-m intersection-  
759 strict” (Anders et al., 2015). Gene counts of scRNA-seq were generated using exonic GTF files. Gene  
760 counts of snRNA-seq were generated using both exonic and intronic GTF files, and the two gene count  
761 tables were merged for analysis. Low quality cells/nuclei having fewer than 50,000 uniquely mapped  
762 reads were removed. Sequencing depth was normalized across individual cells by re-scaling gene counts  
763 to counts per million reads (CPM). All analyses were performed after converting gene counts to  
764  $\log_2(\text{CPM}+1)$ . Non-neuronal cells were filtered out by selecting for the cells with expression of at least 2  
765 of 5 neuronal markers (*elav*, *brp*, *CadN*, *nSyb*, *Syt1*) at  $\log_2(\text{CPM}+1) \geq 2$ .

766

### 767 **Dimensionality reduction and HDBSCAN clustering**

768 Genes for dimensionality reduction were selected using previously described over-dispersion methods  
769 (Li et al., 2020) or by calculating differentially expressed genes between all of the time points (Figure 1F),  
770 or within a single time point (Figures 4G, 5H, 6A,B). Note the differentially expressed genes that were  
771 used for dimensionality reduction of each individual time point (Figure 4–5) and all time points in Figure  
772 6 were identified at 42h APF and combined with known antennal olfactory receptors from (Grabe et al.,  
773 2016) for a total of 335 genes. Principal component analysis (PCA) followed by t-distributed Stochastic  
774 Neighbor Embedding (t-SNE) was used to jointly visualize cells/nuclei from all stages. Briefly, we  
775 obtained two-dimensional projections of cell population by first reducing the dimensionality of the gene  
776 expression matrix and then projecting these genes in to the t-SNE (van der Maaten & Hinton, 2008)  
777 space. We used Uniform Manifold Approximation and Projection (UMAP; McInnes et al., 2018) for  
778 visualization of cells/nuclei at their individual stages. UMAP was used for stage-specific embedding  
779 because it better preserved the global structure of the data and resulted in clearer depictions of the  
780 clusters at each time point. The following HDBSCAN settings were used to classify cells into clusters in  
781 an unbiased manner `min_cluster_size = 6` and `min_samples = 4`.

782

### 783 **MARS clustering**

784 We calculated differentially expressed genes among 42h APF ORN types that we identified in Li et al.,  
785 2020. We combined these genes with known antennal sensory receptors (Grabe et al., 2016), resulting  
786 in a total of 335 genes. We used this set of genes to confirm ORN types at 42h APF, and to identify ORN  
787 types at 24h APF and adult. To cluster each dataset, we applied MARS (Brbic et al., 2020)—a meta-  
788 learning approach for cell type discovery. MARS leverages annotations of previously annotated datasets  
789 to better separate cell types in an unannotated dataset. We first applied MARS to re-annotate 42h APF  
790 ORN types. The annotations agreed well with our previously identified types (Li et al., 2020), and we

McLaughlin et al.

791 used them to annotate 24h APF. We ran MARS seven times with different random initializations  
792 (compared to 9 times on 42h APF transcriptomes) and neural network architectures to increase our  
793 confidence in the discovered clusters, and combined annotations from the different runs. A cluster was  
794 approved by calculating differentially expressed genes in that cluster and checking whether genes agree  
795 with known markers and/or are expressed uniquely in that cluster compared to other cells not assigned  
796 to the cluster. After annotating the 24h APF data, we used these annotations in combination with 42 APF  
797 annotations to guide the clustering of adult neurons. For adult annotations, we proceeded in the same  
798 way as when annotating 24h APF and ran MARS ten times followed by validating each cluster using  
799 marker genes.

800

### 801 **Transcriptome similarity analysis**

802 To compare the transcriptome similarity between 24h APF, 42h APF, and adult clusters, we computed a  
803 set of unbiased 416 differentially expressed genes across all three developmental stages. For each  
804 cluster, we calculated expression profile of differentially expressed genes by taking the average across  
805 all cells within that cluster. We then calculated Pearson correlation coefficient of selected genes between  
806 all pairs of MARS clusters at each stage. For the transcriptome similarity analysis of all ORN types (Figure  
807 4—supplement 2A), we used all clusters discovered by MARS. For the transcriptome similarity analysis  
808 within sensilla types (Figure 7E–G), we used only MARS clusters that were annotated and matched  
809 across all stages to guarantee consistent set of clusters for the comparison.

810

### 811 **Gene Ontology and STRING analysis**

812 Gene Ontology (GO) analysis was used to characterize transcriptome changes in multiple cases. We  
813 generated gene lists for GO analysis by comparing the two groups using differential expression analysis  
814 (Mann-Whitney U test). We identified roughly equal numbers of differentially expressed genes that  
815 reached a significance level of  $p < 10^{-5}$  (after Bonferroni adjustment for multiple testing) for each  
816 comparison group and uploaded these gene lists into Flymine for GO analysis (Lyne et al., 2007).  
817 Redundant GO terms were removed using REVIGO (Supek et al., 2011). We report the p-value of  
818 enrichment for each term.

819

820 The STRING network was made using the top 75 differentially expressed genes from 24h APF ORN  
821 nuclei and adult nuclei into the STRING database search portal. Nodes that did not connect to the network  
822 were not displayed, and edges (links between genes) were generated by their reported interactions and  
823 corresponding confidence scores and plotted in Cytoscape (v3.7.1). Clusters were labeled using the GO  
824 terms that they were associated with and colored based on their on their fold change which was  
825 calculated by  $\log_2[(\text{mean}_{\text{adult}}) / (\text{mean}_{24\text{h APF}} + 0.1)]$ .

826

### 827 **Generation of dendrograms for 24h APF and adult transcriptomes**

828 Dendrograms for 24h APF and adult data were derived from hierarchical clustering of annotated clusters  
829 at each stage. Pair-wise comparisons between all annotated clusters at each stage were performed to  
830 generate a list of differentially expressed genes. This resulted in 437 differentially expressed genes at  
831 24h APF and 936 differentially expressed genes in adult clusters. Average gene expression was then  
832 computed for each cluster and differentially expressed genes were used for dimensionality reduction at  
833 their respective stages, followed by hierarchical clustering using the cluster map function of seaborn  
834 based on the Euclidean distance between each cluster.

835

### 836 **Manual (marker-based) matching and annotating of ORN types**

837 ORN clusters were manually matched using a combination of differentially expressed marker genes and  
838 olfactory receptor (Ir, Gr, Or) expression. Marker genes were identified using our previously published  
839 cluster-specific genes at 42h APF (Li et al., 2020) or via a Mann-Whitney U test to find genes that are  
840 highly expressed in one (or a few) clusters compared to the rest. We searched for either a single gene  
841 or a set of genes whose expression was unique to a single cluster at both 24h APF and 42h APF. If these

McLaughlin et al.

842 marker genes were expressed in one cluster at both time points, we considered these clusters to be the  
843 same ORN type. We used olfactory receptor expression to match some clusters from 24h to 42h APF.  
844 Olfactory receptors were exclusively used to annotate adult clusters and to match them to their  
845 corresponding 42h cluster. Genes used to annotate, and match clusters are summarized in dot plots in  
846 Figures 4 and 5.

847

#### 848 **Automatic matching of ORN types**

849 To automatically identify the same ORN types across different developmental stages, we first calculated  
850 differentially expressed genes in MARS clusters at each stage. We started by matching clusters between  
851 24h and 42h APF, then we matched clusters between 42h and adult APF, and finally used matching  
852 between adult and 24h APF to confirm matches. To match clusters between two stages, we computed  
853 the similarity score of differentially expressed genes between all pairs of clusters using Jaccard similarity  
854 index, defined as the ratio of the number of elements in the intersection of two gene sets and the number  
855 of elements in the union of the gene sets. Two-way matches occurred when cluster X in one stage had  
856 the highest similarity to cluster Y in another stage, and the opposite also held true where cluster Y has  
857 the highest similarity to cluster X. One-way matches occurred when cluster X at one stage has the highest  
858 similarity to cluster Y at another stage, but cluster Y is most similar to another cluster. Since each cluster  
859 has a one-way match by design of the approach, we relied on one-way matching exclusively for those  
860 clusters whose transcriptomes are intermingled (inseparable) between 24h and 42h APF (Figure 7—  
861 supplement 1A).

862

#### 863 **Quantification and statistical analysis**

864 All RNA-seq data analysis was performed in Python using NumPy, SciPy, seaborn, pandas, scikit-learn,  
865 Scanpy (Wolf et al., 2018) and custom scRNA-seq analysis modules (Li et al., 2017; Brbic et al., 2020).

866

#### 867 **Acknowledgements**

868 We are grateful to Daniel Pederick, Jan Lui, Chuanyun Xu, David Luginbuhl, and Zhuoran Li for helpful  
869 discussions about this work and comments on the manuscript. We thank all members of the Luo lab for  
870 helpful discussions. We thank the Bloomington *Drosophila* Stock Center, the Vienna *Drosophila*  
871 Resource center, and the Developmental Studies Hybridoma Bank for fly lines and antibodies. We are  
872 grateful to Mary Molacavage for administrative support. Finally, we thank James Ferguson for help  
873 making the diagram in Figure 1A.

874

#### 875 **Additional information**

##### 876 Competing interests

877 The authors declare no competing financial interests.

878

##### 879 Funding

880 This work was supported by NIH grants (R01 DC005982) to L.L. and (K99 AG062746) to H.L. C.N.M. is  
881 a Howard Hughes Medical Institute fellow of the Damon Runyon Cancer Research Foundation. H.L. was  
882 a Stanford Neuroscience Institute interdisciplinary postdoctoral scholar. J.M.K. is a fellow of the Jane  
883 Coffin Childs Memorial Research Fund. J.L. was supported by NSF grants [OAC-1835598 (CINES),  
884 OAC-1934578 (HDR), CCF-1918940 (Expeditions), IIS-2030477 (RAPID)] and Stanford Data  
885 Science Initiative. J. L. and S.R.Q. are Chan Zuckerberg Biohub Investigators. L.L. is an investigator  
886 of the Howard Hughes Medical Institute.

887

##### 888 Author contributions

889 Colleen McLaughlin, Conceptualization, Methodology, Software, Validation, Resources, Formal Analysis,  
890 Investigation, Writing—original draft preparation, Data curation, Writing—review & editing; Visualization.  
891 Maria Brbić, Methodology, Software, Formal Analysis, Data curation, Writing—review & editing,

McLaughlin et al.

892 Investigation, Visualization. Qijing Xie, Investigation. Tongchao Li, Investigation. Felix Horns,  
893 Investigation, Resources. Sai Saroja Kolluru, Resources. Justus M. Kebschull, Resources. David Vacek,  
894 Investigation. Anthony Xie, Investigation. Jiefu Li, Investigation. Robert C. Jones, Resources. Jure  
895 Leskovec, Resources. Steven R. Quake, Resources, Funding Acquisition. Liqun Luo, Conceptualization,  
896 Resources, Writing—original draft, Writing—review & editing, Supervision, Funding Acquisition. Hongjie Li,  
897 Conceptualization, Methodology, Formal Analysis, Software, Investigation, Resources, Data Curation,  
898 Writing—original draft, Supervision.

899

## 900 References

- 901 Abuin, L., Prieto-Godino, L. L., Pan, H., Gutierrez, C., Huang, L., Jin, R., & Benton, R. (2019). In vivo  
902 assembly and trafficking of olfactory Ionotropic Receptors. *BMC Biology*, *17*(1), 1–15.  
903 <https://doi.org/10.1186/s12915-019-0651-7>
- 904 Allen, A. M., Neville, M. C., Birtles, S., Croset, V., Treiber, C. D., Waddell, S., Goodwin, S. F., & Mann,  
905 R. S. (2020). A single-cell transcriptomic atlas of the adult *Drosophila* ventral nerve cord. *ELife*, *9*.  
906 <https://doi.org/10.7554/eLife.54074>
- 907 Anders, S., Pyl, P. T., & Huber, W. (2015). HTSeq-A Python framework to work with high-throughput  
908 sequencing data. *Bioinformatics*, *31*(2), 166–169. <https://doi.org/10.1093/bioinformatics/btu638>
- 909 Avalos, C. B., Brugmann, R., & Sprecher, S. G. (2019). Single cell transcriptome atlas of the *drosophila*  
910 larval brain. *ELife*, *8*. <https://doi.org/10.7554/eLife.50354>
- 911 Bakken, T. E., Hodge, R. D., Miller, J. A., Yao, Z., Nguyen, T. N., Aevermann, B., Barkan, E., Bertagnolli,  
912 D., Casper, T., Dee, N., Garren, E., Goldy, J., Graybuck, L. T., Kroll, M., Lasken, R. S., Lathia, K.,  
913 Parry, S., Rimorin, C., Scheuermann, R. H., Schork., N., Shehata, S. I., Tieu, M., Phillips, J.W.,  
914 Bernard, A., Smith, K. A., Zeng, H., Lein, E. S., Tasic, B. (2018). Single-nucleus and single-cell  
915 transcriptomes compared in matched cortical cell types. *PLoS ONE*, *13*(12), 1–24.  
916 <https://doi.org/10.1371/journal.pone.0209648>
- 917 Barbagallo, B., & Garrity, P. A. (2015). Temperature sensation in *Drosophila*. *Current Opinion in*  
918 *Neurobiology*, *34*, 8–13. <https://doi.org/10.1016/j.conb.2015.01.002>
- 919 Barish, S., & Volkan, P. C. (2015). Mechanisms of olfactory receptor neuron specification in *Drosophila*.  
920 *Wiley Interdisciplinary Reviews: Developmental Biology*, *4*(6), 609–621.  
921 <https://doi.org/10.1002/wdev.197>
- 922 Benton, R., Sachse, S., Michnick, S. W., & Vosshall, L. B. (2006). Atypical membrane topology and  
923 heteromeric function of *Drosophila* odorant receptors in vivo. *PLoS Biology*, *4*(2), 240–257.  
924 <https://doi.org/10.1371/journal.pbio.0040020>
- 925 Benton, R., Vannice, K. S., Gomez-Diaz, C., & Vosshall, L. B. (2009). Variant Ionotropic Glutamate  
926 Receptors as Chemosensory Receptors in *Drosophila*. *Cell*, *136*(1), 149–162.  
927 <https://doi.org/10.1016/j.cell.2008.12.001>
- 928 Brbic, M., Zitnik, M., Wang, S., Pisco, A. O., Altman, R. B., Darmanis, S., & Leskovec, J. (2020).  
929 Discovering novel cell types across heterogeneous single-cell experiments. *BioRxiv*,  
930 2020.02.25.960302. <https://doi.org/10.1101/2020.02.25.960302>
- 931 Budelli, G., Ni, L., Berciu, C., van Giesen, L., Knecht, Z. A., Chang, E. C., Kaminski, B., Silbering, A. F.,  
932 Samuel, A., Klein, M., Benton, R., Nicastro, D., & Garrity, P. A. (2019). Ionotropic Receptors Specify  
933 the Morphogenesis of Phasic Sensors Controlling Rapid Thermal Preference in *Drosophila*. *Neuron*,  
934 *101*(4), 738–747.e3. <https://doi.org/10.1016/j.neuron.2018.12.022>
- 935 Butterwick, J. A., del Marmol, J., Kim, K. H., Kahlson, M. A., Rogow, J. A., Walz, T., & Ruta, V. (2018).  
936 Cryo-EM structure of the insect olfactory receptor Orco. *Nature*, *560*(7719), 447–452.  
937 <https://doi.org/10.1038/s41586-018-0420-8>
- 938 Campello, R. J. G. B., Moulavi, D., & Sander, J. (2013). Density-based clustering based on hierarchical  
939 density estimates. *Lecture Notes in Computer Science (Including Subseries Lecture Notes in*  
940 *Artificial Intelligence and Lecture Notes in Bioinformatics)*, *7819 LNAI(PART 2)*, 160–172.  
941 [https://doi.org/10.1007/978-3-642-37456-2\\_14](https://doi.org/10.1007/978-3-642-37456-2_14)
- 942 Chotard, C., Leung, W., & Salecker, I. (2005). Glial cells missing and *gcm2* cell autonomously regulate

McLaughlin et al.

- 943 both glial and neuronal development in the visual system of *Drosophila*. *Neuron*, 48(2), 237–251.  
944 <https://doi.org/10.1016/j.neuron.2005.09.019>
- 945 Chou, Y. H., Spletter, M. L., Yaksi, E., Leong, J. C. S., Wilson, R. I., & Luo, L. (2010). Diversity and wiring  
946 variability of olfactory local interneurons in the *Drosophila* antennal lobe. *Nature Neuroscience*,  
947 13(4), 439–449. <https://doi.org/10.1038/nn.2489>
- 948 Clyne, P. J., Certel, S. J., De Bruyne, M., Zaslavsky, L., Johnson, W. A., & Carlson, J. R. (1999). The  
949 odor specificities of a subset of olfactory receptor neurons are governed by Acj6, a POU-domain  
950 transcription factor. *Neuron*, 22(2), 339–347. [https://doi.org/10.1016/S0896-6273\(00\)81094-6](https://doi.org/10.1016/S0896-6273(00)81094-6)
- 951 Clyne, P. J., Warr, C. G., Freeman, M. R., Lessing, D., Kim, J., & Carlson, J. R. (1999). A novel family of  
952 divergent seven-transmembrane proteins: Candidate odorant receptors in *Drosophila*. *Neuron*,  
953 22(2), 327–338. [https://doi.org/10.1016/S0896-6273\(00\)81093-4](https://doi.org/10.1016/S0896-6273(00)81093-4)
- 954 Couto, A., Alenius, M., & Dickson, B. J. (2005). Molecular, anatomical, and functional organization of the  
955 *Drosophila* olfactory system. *Current Biology*, 15(17), 1535–1547.  
956 <https://doi.org/10.1016/j.cub.2005.07.034>
- 957 Croset, V., Treiber, C. D., & Waddell, S. (2018). Cellular diversity in the *Drosophila* midbrain revealed by  
958 single-cell transcriptomics. *ELife*, 7. <https://doi.org/10.7554/eLife.34550>
- 959 Cui, M., Wang, Z., Chen, K., Shah, A. M., Tan, W., Duan, L., Sanchez-Ortiz, E., Li, H., Xu, L., Liu, N.,  
960 Bassel-Duby, R., & Olson, E. N. (2020). Dynamic Transcriptional Responses to Injury of  
961 Regenerative and Non-regenerative Cardiomyocytes Revealed by Single-Nucleus RNA  
962 Sequencing. *Developmental Cell*, 53(1), 102–116.e8. <https://doi.org/10.1016/j.devcel.2020.02.019>
- 963 Dacks, Andrew M., Green, David S., Root, Cory M., Nighorn, Alan, Wang, J. W. (2009). Serotonin  
964 Modulates Olfactory Processing in the Antennal lobe of *Drosophila*. *Journal of Neurogenetics*, 23(4),  
965 366–377. <https://doi.org/10.1038/jid.2014.371>
- 966 Davie, K., Janssens, J., Koldere, D., De Waegeneer, M., Pech, U., Kreft, Ł., Aibar, S., Makhzami, S.,  
967 Christiaens, V., Bravo González-Blas, C., Poovathingal, S., Hulselmans, G., Spanier, K. I.,  
968 Moerman, T., Vanspauwen, B., Geurs, S., Voet, T., Lammertyn, J., Thienpont, B., Liu, S.,  
969 Konstantinides, N., Fiers, M., Verstreken, P., Aerts, S. (2018). A Single-Cell Transcriptome Atlas of  
970 the Aging *Drosophila* Brain. *Cell*, 174(4), 982–998.e20. <https://doi.org/10.1016/j.cell.2018.05.057>
- 971 Deeke, J. M., & Gagnon-Bartsch, J. A. (2020). Stably expressed genes in single-cell RNA sequencing.  
972 *Journal of Bioinformatics and Computational Biology*, 18(1), 1–13.  
973 <https://doi.org/10.1142/S0219720020400041>
- 974 Denisenko, E., Guo, B. B., Jones, M., Hou, R., De Kock, L., Lassmann, T., Poppe, D., Poppe, D.,  
975 Clément, O., Simmons, R. K., Simmons, R. K., Lister, R., & Forrest, A. R. R. (2020). Systematic  
976 assessment of tissue dissociation and storage biases in single-cell and single-nucleus RNA-seq  
977 workflows. *Genome Biology*, 21(1), 1–25. <https://doi.org/10.1186/s13059-020-02048-6>
- 978 Ding, J., Adiconis, X., Simmons, S. K., Kowalczyk, M. S., Hession, C. C., Marjanovic, N. D., Hughes, T.  
979 K., Wadsworth, M. H., Burks, T., Nguyen, L. T., Kwon, J. Y. H., Barak, B., Ge, W., Kedaigle, A. J.,  
980 Carroll, S., Li, S., Hacohen, N., Rozenblatt-Rosen, O., Shalek, A. K., Vilani, A., Regev, A., Levin, J.  
981 Z. (2020). Systematic comparison of single-cell and single-nucleus RNA-sequencing methods.  
982 *Nature Biotechnology*, 38(6), 737–746. <https://doi.org/10.1038/s41587-020-0465-8>
- 983 Dobin, A., Davis, C. A., Schlesinger, F., Drenkow, J., Zaleski, C., Jha, S., Batut, P., Chaisson, M., &  
984 Gingeras, T. R. (2013). STAR: Ultrafast universal RNA-seq aligner. *Bioinformatics*, 29(1), 15–21.  
985 <https://doi.org/10.1093/bioinformatics/bts635>
- 986 Dolzer, J., Krannich, S., Fischer, K., & Stengl, M. (2001). Oscillations of the transepithelial potential of  
987 moth olfactory sensilla are influenced by octopamine and serotonin. *Journal of Experimental Biology*,  
988 204(16), 2781–2794.
- 989 Duffy, J. B., Harrison, D. A., & Perrimon, N. (1998). Identifying loci required for follicular patterning using  
990 directed mosaics. *Development*, 125(12), 2263–2271.
- 991 Dweck, H. K. M., Ebrahim, S. A. M., Kromann, S., Bown, D., Hillbur, Y., Sachse, S., Hansson, B. S., &  
992 Stensmyr, M. C. (2013). Olfactory preference for egg laying on citrus substrates in *Drosophila*.  
993 *Current Biology*, 23(24), 2472–2480. <https://doi.org/10.1016/j.cub.2013.10.047>

McLaughlin et al.

- 994 Dweck, H. K. M., Ebrahim, S. A. M., Retzke, T., Grabe, V., Weißflog, J., Svatoš, A., Hansson, B. S., &  
995 Knaden, M. (2018). The Olfactory Logic behind Fruit Odor Preferences in Larval and Adult  
996 *Drosophila*. *Cell Reports*, 23(8), 2524–2531. <https://doi.org/10.1016/j.celrep.2018.04.085>
- 997 Dweck, H. K. M., Ebrahim, S. A. M., Thoma, M., Mohamed, A. A. M., Keeseey, I. W., Trona, F., Lavista-  
998 Llanos, S., Svatoš, A., Sachse, S., Knaden, M., & Hansson, B. S. (2015). Pheromones mediating  
999 copulation and attraction in *Drosophila*. *Proceedings of the National Academy of Sciences of the*  
1000 *United States of America*, 112(21), E2829–E2835. <https://doi.org/10.1073/pnas.1504527112>
- 1001 Ebrahim, S. A. M., Dweck, H. K. M., Stökl, J., Hofferberth, J. E., Trona, F., Weniger, K., Rybak, J., Seki,  
1002 Y., Stensmyr, M. C., Sachse, S., Hansson, B. S., & Knaden, M. (2015). *Drosophila* Avoids  
1003 Parasitoids by Sensing Their Semiochemicals via a Dedicated Olfactory Circuit. *PLoS Biology*,  
1004 13(12), 1–18. <https://doi.org/10.1371/journal.pbio.1002318>
- 1005 Endo, K., Aoki, T., Yoda, Y., Kimura, K. I., & Hama, C. (2007). Notch signal organizes the *Drosophila*  
1006 olfactory circuitry by diversifying the sensory neuronal lineages. *Nature Neuroscience*, 10(2), 153–  
1007 160. <https://doi.org/10.1038/nn1832>
- 1008 Endo, K., Karim, M. R., Taniguchi, H., Krejci, A., Kinameri, E., Siebert, M., Ito, K., Bray, S. J., & Moore,  
1009 A. W. (2012). Chromatin modification of Notch targets in olfactory receptor neuron diversification.  
1010 *Nature Neuroscience*, 15(2), 224–233. <https://doi.org/10.1038/nn.2998>
- 1011 Enjin, A., Zaharieva, E. E., Frank, D. D., Mansourian, S., Suh, G. S. B., Gallio, M., & Stensmyr, M. C.  
1012 (2016). Humidity sensing in *drosophila*. *Current Biology*, 26(10), 1352–1358.  
1013 <https://doi.org/10.1016/j.cub.2016.03.049>
- 1014 Fishilevich, E., & Vosshall, L. B. (2005). Genetic and functional subdivision of the *Drosophila* antennal  
1015 lobe. *Current Biology*, 15(17), 1548–1553. <https://doi.org/10.1016/j.cub.2005.07.066>
- 1016 French, A. S., Simcock, K. L., Rolke, D., Gartside, S. E., Blenau, W., & Wright, G. A. (2014). The role of  
1017 serotonin in feeding and gut contractions in the honeybee. *Journal of Insect Physiology*, 61(1), 8–  
1018 15. <https://doi.org/10.1016/j.jinsphys.2013.12.005>
- 1019 Gallio, M., Ofstad, T. A., Macpherson, L. J., Wang, J. W., & Zuker, C. S. (2011). The coding of  
1020 temperature in the *Drosophila* brain. *Cell*, 144(4), 614–624.  
1021 <https://doi.org/10.1016/j.cell.2011.01.028>
- 1022 Gene Ontology : tool for the. (2000). *Nature Genetics*, 25, 25–29. <https://doi.org/10.1038/75556>
- 1023 Gomez-Diaz, C., Martin, F., Garcia-Fernandez, J. M., & Alcorta, E. (2018). The two main olfactory  
1024 receptor families in *drosophila*, ORs and IRs: A comparative approach. *Frontiers in Cellular*  
1025 *Neuroscience*, 12(August). <https://doi.org/10.3389/fncel.2018.00253>
- 1026 Grabe, V., Baschwitz, A., Dweck, H. K. M., Lavista-Llanos, S., Hansson, B. S., & Sachse, S. (2016).  
1027 Elucidating the Neuronal Architecture of Olfactory Glomeruli in the *Drosophila* Antennal Lobe. *Cell*  
1028 *Reports*, 16(12), 3401–3413. <https://doi.org/10.1016/j.celrep.2016.08.063>
- 1029 Grindberg, R. V., Yee-Greenbaum, J. L., McConnell, M. J., Novotny, M., O’Shaughnessy, A. L., Lambert,  
1030 G. M., Araújo-Bravo, M. J., Lee, J., Fishman, M., Robbins, G. E., Lin, X., Venepally, P., Badger, J.  
1031 H., Galbraith, D. W., Gage, F. H., & Lasken, R. S. (2013). RNA-sequencing from single nuclei.  
1032 *Proceedings of the National Academy of Sciences of the United States of America*, 110(49), 19802–  
1033 19807. <https://doi.org/10.1073/pnas.1319700110>
- 1034 Grosmaître, X., Marion-Poll, F., & Renou, M. (2001). Biogenic amines modulate olfactory receptor  
1035 neurons firing activity in *Mamestra brassicae*. *Chemical Senses*, 26(6), 653–661.  
1036 <https://doi.org/10.1093/chemse/26.6.653>
- 1037 Habib, N., Avraham-Davidi, I., Basu, A., Burks, T., Shekhar, K., Hofree, M., Choudhury, S. R., Aguet, F.,  
1038 Gelfand, E., Ardlie, K., Weitz, D. A., Rozenblatt-Rosen, O., Zhang, F., & Regev, A. (2017). Massively  
1039 parallel single-nucleus RNA-seq with DroNc-seq. *Nature Methods*, 14(10), 955–958.  
1040 <https://doi.org/10.1038/nmeth.4407>
- 1041 Habib, N., Li, Y., Heidenreich, M., Swiech, L., Avraham-Davidi, I., Trombetta, J. J., Hession, C., Zhang,  
1042 F., & Regev, A. (2016). Div-Seq: Single-nucleus RNA-Seq reveals dynamics of rare adult newborn  
1043 neurons. *Science*, 353(6302), 925–928. <https://doi.org/10.1126/science.aad7038>
- 1044 Hallem, E. A., & Carlson, J. R. (2006). Coding of Odors by a Receptor Repertoire. *Cell*, 125(1), 143–160.

McLaughlin et al.

- 1045 <https://doi.org/10.1016/j.cell.2006.01.050>
- 1046 Hallem, E. A., Ho, M. G., & Carlson, J. R. (2004). The molecular basis of odor coding in the *Drosophila*
- 1047 antenna. *Cell*, *117*(7), 965–979. <https://doi.org/10.1016/j.cell.2004.05.012>
- 1048 Hanchate, N. K., Kondoh, K., Lu, Z., Kuang, D., Ye, X., Qiu, X., Pachter, L., Trapnell, C., & Buck, L. B.
- 1049 (2015). Single-cell transcriptomics reveals receptor transformations during olfactory neurogenesis.
- 1050 *Science*, *350*(6265), 1251–1255. <https://doi.org/10.1126/science.aad2456>
- 1051 Hekmat-Safe, D. S., Safe, C. R., McKinney, A. J., & Tanouye, M. A. (2002). Genome-Wide analysis of
- 1052 the odorant-binding protein gene family in *Drosophila melanogaster*. *Genome Research*, *12*(9),
- 1053 1357–1369. <https://doi.org/10.1101/gr.239402>
- 1054 Henry, G. L., Davis, F. P., Picard, S., & Eddy, S. R. (2012). Cell type-specific genomics of *Drosophila*
- 1055 neurons. *Nucleic Acids Research*, *40*(19), 9691–9704. <https://doi.org/10.1093/nar/gks671>
- 1056 Ilicic, T., Kim, J. K., Kolodziejczyk, A. A., Bagger, F. O., McCarthy, D. J., Marioni, J. C., & Teichmann, S.
- 1057 A. (2016). Classification of low quality cells from single-cell RNA-seq data. *Genome Biology*, *17*(1),
- 1058 1–15. <https://doi.org/10.1186/s13059-016-0888-1>
- 1059 Jefferis, G. S. X. E., Vyas, R. M., Berdnik, D., Ramaekers, A., Stocker, R. F., Tanaka, N. K., Ito, K., &
- 1060 Luo, L. (2004). Developmental origin of wiring specificity in the olfactory system of *Drosophila*.
- 1061 *Development*, *131*(1), 117–130. <https://doi.org/10.1242/dev.00896>
- 1062 Joo, W. J., Sweeney, L. B., Liang, L., & Luo, L. (2013). Linking cell fate, trajectory choice, and target
- 1063 selection: Genetic analysis of *sema-2b* in olfactory axon targeting. *Neuron*, *78*(4), 673–686.
- 1064 <https://doi.org/10.1016/j.neuron.2013.03.022>
- 1065 Kain, P., Chakraborty, T. S., Sundaram, S., Siddiqi, O., Rodrigues, V., & Hasan, G. (2008). Reduced
- 1066 odor responses from antennal neurons of *Gqα*, phospholipase *Cβ*, and *rdgA* mutants in *Drosophila*
- 1067 support a role for a phospholipid intermediate in insect olfactory transduction. *Journal of*
- 1068 *Neuroscience*, *28*(18), 4745–4755. <https://doi.org/10.1523/JNEUROSCI.5306-07.2008>
- 1069 Kebuschull, J. M., Ringach, N., Richman, E. B., Friedmann, D., Kolluru, S. S., Jones, R. C., Allen, W. E.,
- 1070 Wang, Y., Zhou, H., Cho, S. W., Chang, H. Y., Deisseroth, K., Quake, S. R., & Luo, L. (2020).
- 1071 Cerebellar nuclei evolved by repeatedly duplicating a conserved cell type set. *BioRxiv*,
- 1072 2020.06.25.170118. <https://doi.org/10.1101/2020.06.25.170118>
- 1073 Knecht, Z. A., Silbering, A. F., Cruz, J., Yang, L., Croset, V., Benton, R., & Garrity, P. A. (2017). Ionotropic
- 1074 receptor-dependent moist and dry cells control hygrosensation in *Drosophila*. *ELife*, *6*.
- 1075 <https://doi.org/10.7554/eLife.26654>
- 1076 Knecht, Z. A., Silbering, A. F., Ni, L., Klein, M., Budelli, G., Bell, R., Abuin, L., Ferrer, A. J., Samuel, A. D.
- 1077 T., Benton, R., & Garrity, P. A. (2016). Distinct combinations of variant ionotropic glutamate
- 1078 receptors mediate thermosensation and hygrosensation in *drosophila*. *ELife*, *5*.
- 1079 <https://doi.org/10.7554/eLife.17879>
- 1080 Komiyama, T., Carlson, J. R., & Luo, L. (2004). Olfactory receptor neuron axon targeting: Intrinsic
- 1081 transcriptional control and hierarchical interactions. *Nature Neuroscience*, *7*(8), 819–825.
- 1082 <https://doi.org/10.1038/nn1284>
- 1083 Kreher, S. A., Kwon, J. Y., & Carlson, J. R. (2005). The molecular basis of odor coding in the *Drosophila*
- 1084 larva. *Neuron*, *46*(3), 445–456. <https://doi.org/10.1016/j.neuron.2005.04.007>
- 1085 Krishnaswami, S. R., Grindberg, R. V., Novotny, M., Venepally, P., Lacar, B., Bhutani, K., Linker, S. B.,
- 1086 Pham, S., Erwin, J. A., Miller, J. A., Hodge, R., McCarthy, J. K., Kelder, M., McCorrison, J.,
- 1087 Aevermann, B. D., Fuertes, F. D., Scheuermann, R. H., Lee, J., Lein, E. S., Schork, N., McConnell,
- 1088 M.J., Gage, F. H., Lasken, R. S. (2016). Using single nuclei for RNA-seq to capture the transcriptome
- 1089 of postmortem neurons. *Nature Protocols*, *11*(3), 499–524. <https://doi.org/10.1038/nprot.2016.015>
- 1090 Kurtovic, A., Widmer, A., & Dickson, B. J. (2007). A single class of olfactory neurons mediates behavioural
- 1091 responses to a *Drosophila* sex pheromone. *Nature*, *446*(7135), 542–546.
- 1092 <https://doi.org/10.1038/nature05672>
- 1093 Kwon, J. Y., Dahanukar, A., Weiss, L. A., & Carlson, J. R. (2007). The molecular basis of CO<sub>2</sub> reception
- 1094 in *Drosophila*. *Proceedings of the National Academy of Sciences of the United States of America*,
- 1095 *104*(9), 3574–3578. <https://doi.org/10.1073/pnas.0700079104>



McLaughlin et al.

- 1096 Larter, N. K., Sun, J. S., & Carlson, J. R. (2016). Organization and function of *Drosophila* odorant binding  
1097 proteins. *ELife*, 5. <https://doi.org/10.7554/eLife.20242>
- 1098 Lau, X., Munusamy, P., Ng, M. J., & Sangrithi, M. (2020). Single-Cell RNA Sequencing of the Cynomolgus  
1099 Macaque Testis Reveals Conserved Transcriptional Profiles during Mammalian Spermatogenesis.  
1100 *Developmental Cell*, 54(4), 548-566.e7. <https://doi.org/10.1016/j.devcel.2020.07.018>
- 1101 Li, G. W., & Xie, X. S. (2011). Central dogma at the single-molecule level in living cells. *Nature*, 475(7356),  
1102 308–315. <https://doi.org/10.1038/nature10315>
- 1103 Li, H. (2020). Single-cell RNA sequencing in *Drosophila*: Technologies and applications. *Wiley*  
1104 *Interdisciplinary Reviews: Developmental Biology*, August, 1–16. <https://doi.org/10.1002/wdev.396>
- 1105 Li, H., Horns, F., Xie, Q., Xie, Q., Li, T., Luginbuhl, D. J., Luo, L., & Quake, S. R. (2017). Classifying  
1106 *Drosophila* Olfactory Projection Neuron Subtypes by Single-Cell RNA Sequencing. *Cell*, 171(5),  
1107 1206-1220. <https://doi.org/10.1016/j.cell.2017.10.019>
- 1108 Li, H., Li, T., Horns, F., Li, J., Xie, Q., Xu, C., Wu, B., Kechschull, J. M., McLaughlin, C. N., Kolluru, S. S.,  
1109 Jones, R. C., Vacek, D., Xie, A., Luginbuhl, D. J., Quake, S. R., & Luo, L. (2020). Single-Cell  
1110 Transcriptomes Reveal Diverse Regulatory Strategies for Olfactory Receptor Expression and Axon  
1111 Targeting. *Current Biology*, 30, 1189-1198. <https://doi.org/10.1016/j.cub.2020.01.049>
- 1112 Li, H., Shuster, S. A., Li, J., & Luo, L. (2018). Linking neuronal lineage and wiring specificity. *Neural*  
1113 *Development*, 13(1), 1–19. <https://doi.org/10.1186/s13064-018-0102-0>
- 1114 Li, J., Guajardo, R., Xu, C., Wu, B., Li, H., Li, T., Luginbuhl, D. J., Xie, X., & Luo, L. (2018). Stepwise  
1115 wiring of the *drosophila* olfactory map requires specific plexin B levels. *ELife*, 7.  
1116 <https://doi.org/10.7554/eLife.39088>
- 1117 Lin, C.-C., Prokop-Prigge, K. A., Preti, G., & Potter, C. J. (2015). Food odors trigger *Drosophila* males to  
1118 deposit a pheromone that guides aggregation and female oviposition decisions. *ELife*, 4.  
1119 <https://doi.org/10.7554/elife.08688>
- 1120 Little, S. C., Tikhonov, M., & Gregor, T. (2013). Precise developmental gene expression arises from  
1121 globally stochastic transcriptional activity. *Cell*, 154(4), 789–800.  
1122 <https://doi.org/10.1016/j.cell.2013.07.025>
- 1123 Luo, L., Joyce Liao, Y., Jan, L. Y., & Jan, Y. N. (1994). Distinct morphogenetic functions of similar small  
1124 GTPases: *Drosophila* Drac1 is involved in axonal outgrowth and myoblast fusion. *Genes and*  
1125 *Development*, 8(15), 1787–1802. <https://doi.org/10.1101/gad.8.15.1787>
- 1126 Lyne, R., Smith, R., Rutherford, K., Wakeling, M., Varley, A., Guillier, F., Janssens, H., Ji, W., McLaren,  
1127 P., North, P., Rana, D., Riley, T., Sullivan, J., Watkins, X., Woodbridge, M., Lilley, K., Russell, S.,  
1128 Ashburner, M., Mizuguchi, K., & Micklem, G. (2007). FlyMine: An integrated database for *Drosophila*  
1129 and *Anopheles* genomics. *Genome Biology*, 8(7). <https://doi.org/10.1186/gb-2007-8-7-r129>
- 1130 Marin, E. C., Büld, L., Theiss, M., Sarkissian, T., Roberts, R. J. V., Turnbull, R., Tamimi, I. F. M., Pleijzier,  
1131 M. W., Laursen, W. J., Drummond, N., Schlegel, P., Bates, A. S., Li, F., Landgraf, M., Costa, M.,  
1132 Bock, D. D., Garrity, P. A., & Jefferis, G. S. X. E. (2020). Connectomics Analysis Reveals First-,  
1133 Second-, and Third-Order Thermosensory and Hygrosensory Neurons in the Adult *Drosophila* Brain.  
1134 *Current Biology*, 30(16), 3167-3182.e4. <https://doi.org/10.1016/j.cub.2020.06.028>
- 1135 Martin, F., Boto, T., Gomez-Diaz, C., & Alcorta, E. (2013). Elements of olfactory reception in adult  
1136 *Drosophila melanogaster*. *Anatomical Record*, 296(9), 1477–1488. <https://doi.org/10.1002/ar.22747>
- 1137 McInnes, L., Healy, J., Saul, N., & Großberger, L. (2018). UMAP: Uniform Manifold Approximation and  
1138 Projection. *Journal of Open Source Software*, 3(29), 861. <https://doi.org/10.21105/joss.00861>
- 1139 Mosca, T. J., & Luo, L. (2014). Synaptic organization of the *Drosophila* antennal lobe and its regulation  
1140 by the Teneurins. *ELife*, 3. <https://doi.org/10.7554/elife.03726>
- 1141 Mu, Q., Chen, Y., & Wang, J. (2019). Deciphering Brain Complexity Using Single-cell Sequencing.  
1142 *Genomics, Proteomics and Bioinformatics*, 17(4), 344–366.  
1143 <https://doi.org/10.1016/j.gpb.2018.07.007>
- 1144 Munsky, B., Neuert, G., & Van Oudenaarden, A. (2012). Using gene expression noise to understand  
1145 gene regulation. *Science*, 336(6078), 183–187. <https://doi.org/10.1126/science.1216379>
- 1146 Nakagawa, T., & Vossball, L. B. (2009). Controversy and consensus: noncanonical signaling

McLaughlin et al.

- 1147 mechanisms in the insect olfactory system. *Current Opinion in Neurobiology*, 19(3), 284–292.  
1148 <https://doi.org/10.1016/j.conb.2009.07.015>
- 1149 Ni, L., Bronk, P., Chang, E. C., Lowell, A. M., Flam, J. O., Panzano, V. C., Theobald, D. L., Griffith, L. C.,  
1150 & Garrity, P. A. (2013). A gustatory receptor paralogue controls rapid warmth avoidance in  
1151 *Drosophila*. *Nature*, 500(7464), 580–584. <https://doi.org/10.1038/nature12390>
- 1152 Ni, L., Klein, M., Svec, K. V., Budelli, G., Chang, E. C., Ferrer, A. J., Benton, R., Samuel, A. D. T., &  
1153 Garrity, P. A. (2016). The ionotropic receptors IR21a and IR25a mediate cool sensing in *Drosophila*.  
1154 *ELife*, 5. <https://doi.org/10.7554/eLife.13254>
- 1155 Ofengeim, D., Giagtzoglou, N., Huh, D., Zou, C., & Yuan, J. (2017). Single-Cell RNA Sequencing:  
1156 Unraveling the Brain One Cell at a Time. *Trends in Molecular Medicine*, 23(6), 563–576.  
1157 <https://doi.org/10.1016/j.molmed.2017.04.006>
- 1158 Olsen, S. R., Bhandawat, V., & Wilson, R. I. (2007). Excitatory Interactions between Olfactory Processing  
1159 Channels in the *Drosophila* Antennal Lobe. *Neuron*, 54(1), 89–103.  
1160 <https://doi.org/10.1016/j.neuron.2007.03.010>
- 1161 Picelli, S., Faridani, O. R., Björklund, Å. K., Winberg, G., Sagasser, S., & Sandberg, R. (2014). Full-length  
1162 RNA-seq from single cells using Smart-seq2. *Nature Protocols*, 9(1), 171–181.  
1163 <https://doi.org/10.1038/nprot.2014.006>
- 1164 Pignoni, F., & Zipursky, S. L. (1997). Induction of *Drosophila* eye development by decapentaplegic.  
1165 *Development*, 124(2), 271–278.
- 1166 Potter, C. J., Tasic, B., Russler, E. V., Liang, L., & Luo, L. (2010). The Q system: A repressible binary  
1167 system for transgene expression, lineage tracing, and mosaic analysis. *Cell*, 141(3), 536–548.  
1168 <https://doi.org/10.1016/j.cell.2010.02.025>
- 1169 Ronderos, D. S., Lin, C. C., Potter, C. J., & Smith, D. P. (2014). Farnesol-detecting olfactory neurons in  
1170 *drosophila*. *Journal of Neuroscience*, 34(11), 3959–3968.  
1171 <https://doi.org/10.1523/JNEUROSCI.4582-13.2014>
- 1172 Root, C. M., Ko, K. I., Jafari, A., & Wang, J. W. (2011). Presynaptic facilitation by neuropeptide signaling  
1173 mediates odor-driven food search. *Cell*, 145(1), 133–144. <https://doi.org/10.1016/j.cell.2011.02.008>
- 1174 Roy, B., Singh, A. P., Shetty, C., Chaudhary, V., North, A., Landgraf, M., VijayRaghavan, K., & Rodrigues,  
1175 V. (2007). Metamorphosis of an identified serotonergic neuron in the *Drosophila* olfactory system.  
1176 *Neural Development*, 2(1), 1–17. <https://doi.org/10.1186/1749-8104-2-20>
- 1177 Rybak, J., Talarico, G., Ruiz, S., Arnold, C., Cantera, R., & Hansson, B. S. (2016). Synaptic circuitry of  
1178 identified neurons in the antennal lobe of *Drosophila melanogaster*. *Journal of Comparative*  
1179 *Neurology*, 524(9), 1920–1956. <https://doi.org/10.1002/cne.23966>
- 1180 Scott, K., Brady, R., Cravchik, A., Morozov, P., Rzhetsky, A., Zuker, C., & Axel, R. (2001). A  
1181 chemosensory gene family encoding candidate gustatory and olfactory receptors in *Drosophila*. *Cell*,  
1182 104(5), 661–673. [https://doi.org/10.1016/S0092-8674\(01\)00263-X](https://doi.org/10.1016/S0092-8674(01)00263-X)
- 1183 Semmelhack, J. L., & Wang, J. W. (2009). Select *Drosophila* glomeruli mediate innate olfactory attraction  
1184 and aversion. *Nature*, 459(7244), 218–223. <https://doi.org/10.1038/nature07983>
- 1185 Senthilan, P. R., Piepenbrock, D., Ovezmyradov, G., Nadrowski, B., Bechstedt, S., Pauls, S., Winkler,  
1186 M., Möbius, W., Howard, J., & Göpfert, M. C. (2012). *Drosophila* auditory organ genes and genetic  
1187 hearing defects. *Cell*, 150(5), 1042–1054. <https://doi.org/10.1016/j.cell.2012.06.043>
- 1188 Shang, Y., Claridge-Chang, A., Sjulson, L., Pypaert, M., & Miesenböck, G. (2007). Excitatory Local  
1189 Circuits and Their Implications for Olfactory Processing in the Fly Antennal Lobe. *Cell*, 128(3), 601–  
1190 612. <https://doi.org/10.1016/j.cell.2006.12.034>
- 1191 Silbering, A. F., Rytz, R., Grosjean, Y., Abuin, L., Ramdya, P., Jefferis, G. S. X. E., & Benton, R. (2011).  
1192 Complementary function and integrated wiring of the evolutionarily distinct *Drosophila* olfactory  
1193 subsystems. *Journal of Neuroscience*, 31(38), 13357–13375.  
1194 <https://doi.org/10.1523/JNEUROSCI.2360-11.2011>
- 1195 Sinakevitch, I., & Strausfeld, N. J. (2006). Comparison of octopamine-like immunoreactivity in the brains  
1196 of the fruit fly and blow fly. *Journal of Comparative Neurology*, 494(3), 460–475.  
1197 <https://doi.org/10.1002/cne.20799>

McLaughlin et al.

- 1198 Stocker, R. F., Heimbeck, G., Gendre, N., & De Belle, J. S. (1997). Neuroblast ablation in *Drosophila*  
1199 P[GAL4] lines reveals origins of olfactory interneurons. *Journal of Neurobiology*, 32(5), 443–456.  
1200 [https://doi.org/10.1002/\(SICI\)1097-4695\(199705\)32:5<443::AID-NEU1>3.0.CO;2-5](https://doi.org/10.1002/(SICI)1097-4695(199705)32:5<443::AID-NEU1>3.0.CO;2-5)
- 1201 Supek, F., Bošnjak, M., Škunca, N., & Šmuc, T. (2011). Revigo summarizes and visualizes long lists of  
1202 gene ontology terms. *PLoS ONE*, 6(7). <https://doi.org/10.1371/journal.pone.0021800>
- 1203 Suzuki, Y., Schenk, J. E., Tan, H., & Gaudry, Q. (2020). A Population of Interneurons Signals Changes  
1204 in the Basal Concentration of Serotonin and Mediates Gain Control in the *Drosophila* Antennal Lobe.  
1205 *Current Biology*, 30(6), 1110–1118.e4. <https://doi.org/10.1016/j.cub.2020.01.018>
- 1206 Tan, L., Li, Q., & Xie, X. S. (2015). Olfactory sensory neurons transiently express multiple olfactory  
1207 receptors during development. *Molecular Systems Biology*, 11(12), 844.  
1208 <https://doi.org/10.15252/msb.20156639>
- 1209 Tierney, A. J. (2018). Invertebrate serotonin receptors: A molecular perspective on classification and  
1210 pharmacology. *Journal of Experimental Biology*, 221(19). <https://doi.org/10.1242/jeb.184838>
- 1211 Tirian, L., & Dickson, B. (2017). *The VT GAL4, LexA, and split-GAL4 driver line collections for targeted*  
1212 *expression in the Drosophila nervous system*. 198648. <https://doi.org/10.1101/198648>
- 1213 van der Goes van Naters, W., & Carlson, J. R. R. (2007). Receptors and Neurons for Fly Odors in  
1214 *Drosophila*. *Current Biology*, 17(7), 606–612. <https://doi.org/10.1016/j.cub.2007.02.043>
- 1215 van der Maaten, L., Hinton, G. (2008). Visualizing Data using t-SNE. *Journal of Machine Learning*  
1216 *Research*, 9, 2579–2605. <https://doi.org/10.1007/s10479-011-0841-3>
- 1217 Vosshall, L. B., Amrein, H., Morozov, P. S., Rzhetsky, A., & Axel, R. (1999). A spatial map of olfactory  
1218 receptor expression in the *Drosophila* antenna. *Cell*, 96(5), 725–736. [https://doi.org/10.1016/S0092-8674\(00\)80582-6](https://doi.org/10.1016/S0092-8674(00)80582-6)
- 1219
- 1220 Wicher, D., Schäfer, R., Bauernfeind, R., Stensmyr, M. C., Heller, R., Heinemann, S. H., & Hansson, B.  
1221 S. (2008). *Drosophila* odorant receptors are both ligand-gated and cyclic-nucleotide- activated  
1222 cation channels. *Nature*, 452(7190), 1007–1011. <https://doi.org/10.1038/nature06861>
- 1223 Wolf, F. A., Angerer, P., & Theis, F. J. (2018). SCANPY: large-scale single-cell gene expression data  
1224 analysis. *Genome Biology*, 19(1), 15. <https://doi.org/10.1186/s13059-017-1382-0>
- 1225 Wu, H., Kirita, Y., Donnelly, E. L., & Humphreys, B. D. (2019). Advantages of Single-Nucleus over Single-  
1226 Cell RNA Sequencing of Adult Kidney: Rare Cell Types and Novel Cell States Revealed in Fibrosis.  
1227 *Journal of the American Society of Nephrology*, 30(1), 23–32.  
1228 <https://doi.org/10.1681/asn.2018090912>
- 1229 Wu, J. S., & Luo, L. (2006). A protocol for dissecting *Drosophila melanogaster* brains for live imaging or  
1230 immunostaining. *Nature Protocols*, 1(4), 2110–2115. <https://doi.org/10.1038/nprot.2006.336>
- 1231 Yao, C. A., Ignell, R., & Carlson, J. R. (2005). Chemosensory coding by neurons in the coeloconic sensilla  
1232 of the *Drosophila* antenna. *Journal of Neuroscience*, 25(37), 8359–8367.  
1233 <https://doi.org/10.1523/JNEUROSCI.2432-05.2005>
- 1234 Zhang, X., & Gaudry, Q. (2016). Functional integration of a serotonergic neuron in the *drosophila*  
1235 antennal lobe. *ELife*, 5. <https://doi.org/10.7554/eLife.16836>
- 1236

McLaughlin et al.

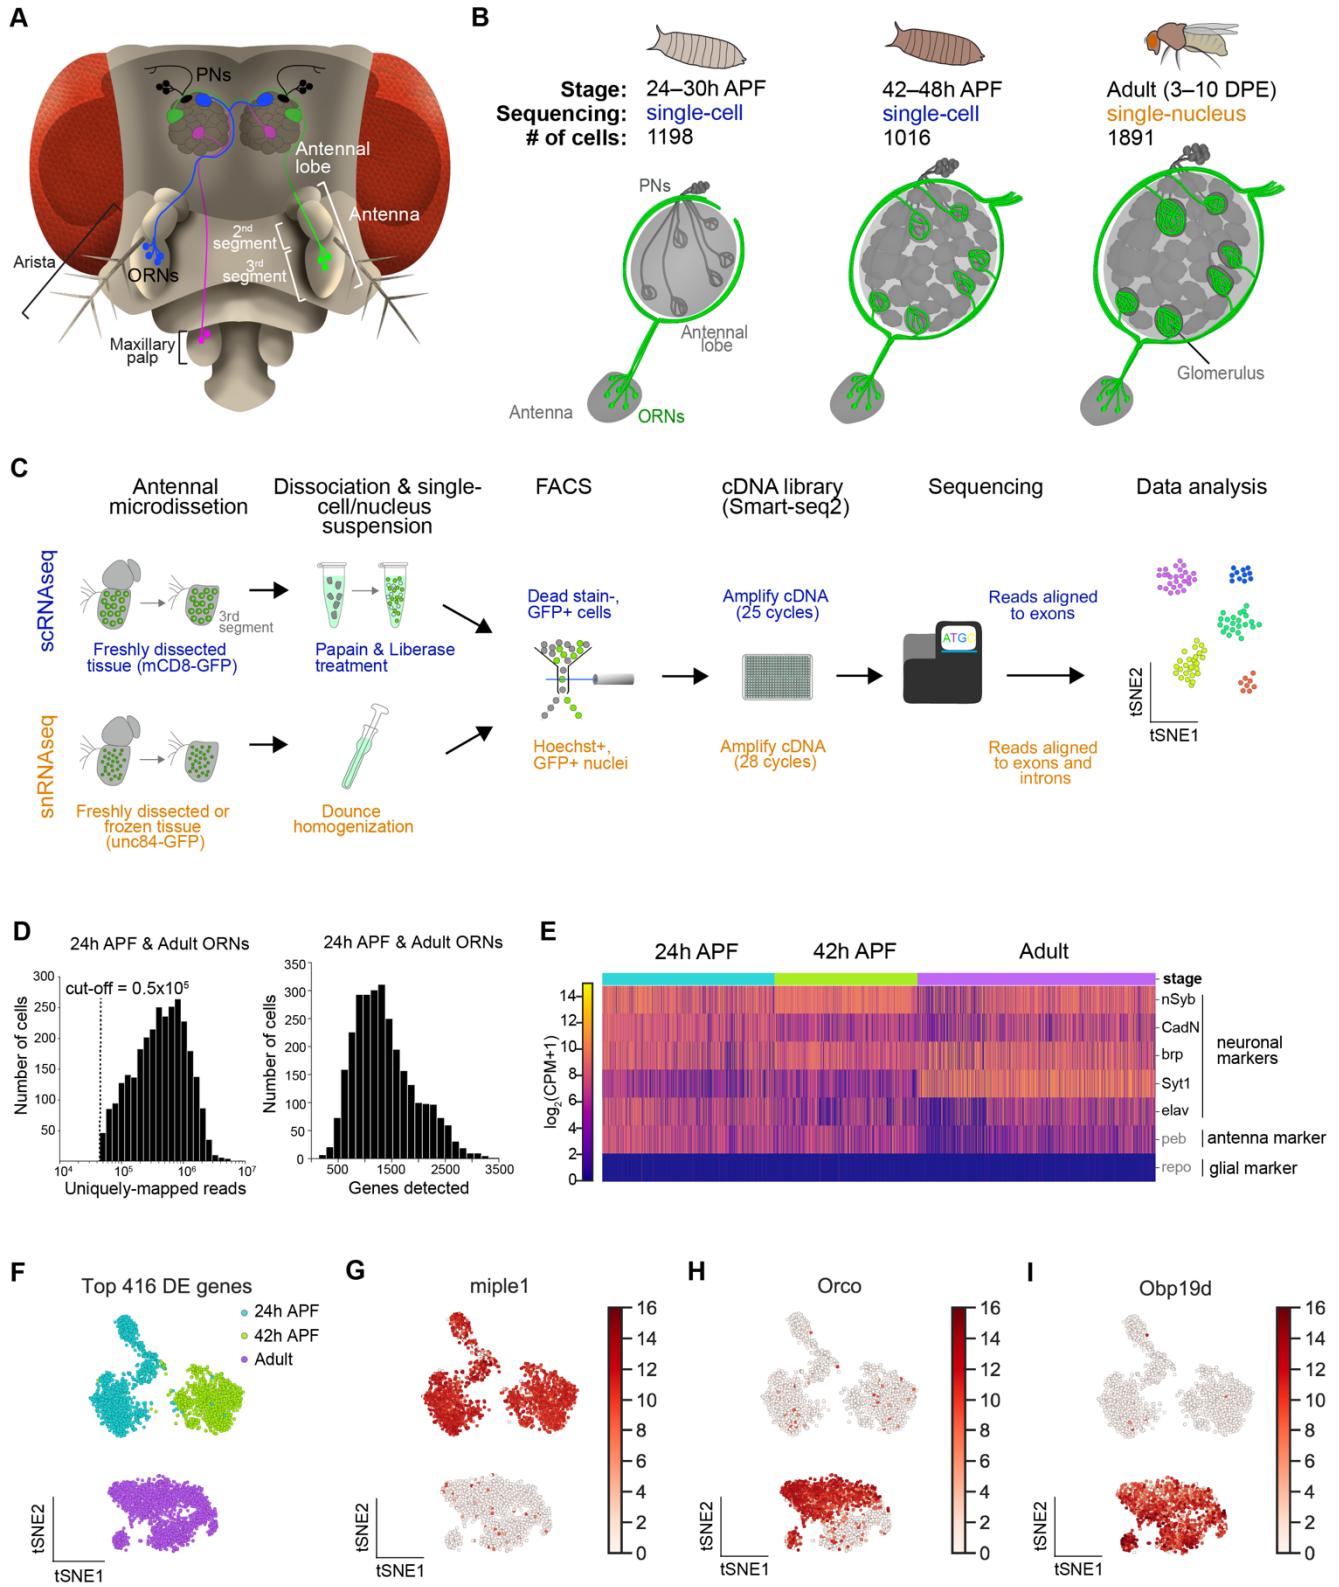

McLaughlin et al.

1238 **Figure 1.** Single-cell transcriptomic profiling of *Drosophila* olfactory receptor neurons. (A) Schematic of  
1239 *Drosophila* olfactory system. Three types of olfactory receptor neurons (ORNs) are portrayed in three  
1240 different colors (green, magenta, and blue) and their cell bodies are housed in the antennae and maxillary  
1241 palps. Axons form one-to-one synapses onto projection neuron (PN; black) dendrites in the antennal lobe  
1242 of the brain. (B) Diagram containing information about the olfactory circuit and sequencing performed at  
1243 three stages: 24–30h APF (h APF; hours after puparium formation), 42–48h APF, and adults (3–10 DPE;  
1244 days post-eclosion). Each ORN type expresses a unique olfactory receptor or a unique combination of  
1245 receptors and sends its axons to a stereotyped glomerulus. 42h APF neurons were previously sequenced  
1246 in Li et al., 2020. (C) Diagram highlighting key differences in single-cell (blue) and single-nucleus (orange)  
1247 RNA sequencing protocols. Cells are labeled with membrane-bound mCD8-GFP, whereas nuclei are  
1248 marked with the nuclear envelop-bound unc84-GFP. (D) Distributions of uniquely mapped reads per cell  
1249 (left) and number of detected genes per cell (right). Dashed line in uniquely mapped reads distribution  
1250 marks the reads cut-off. (E) Heatmap depicting that ORNs analyzed express five pan-neuronal markers  
1251 (*nSyb*, *CadN*, *brp*, *Syt1*, *elav*), an antennal cell marker (*peb*), but not a glial marker (*repo*). We filtered for  
1252 high-quality neurons by ensuring that they expressed 2 out of 5 neuronal markers (in black) at  
1253  $\log_2(\text{CPM}+1) \geq 2$  (CPM: counts per million reads). (F) t-SNE plot depicting all sequenced ORNs.  
1254 Dimensionality reduction was performed using the top 416 differentially expressed (DE) genes from  
1255 neurons at all stages profiled. (G–I) Expression of genes specific to developing neurons (G) and mature  
1256 neurons (H and I). Scale bar depicts  $\log_2(\text{CPM}+1)$ .  
1257

1258

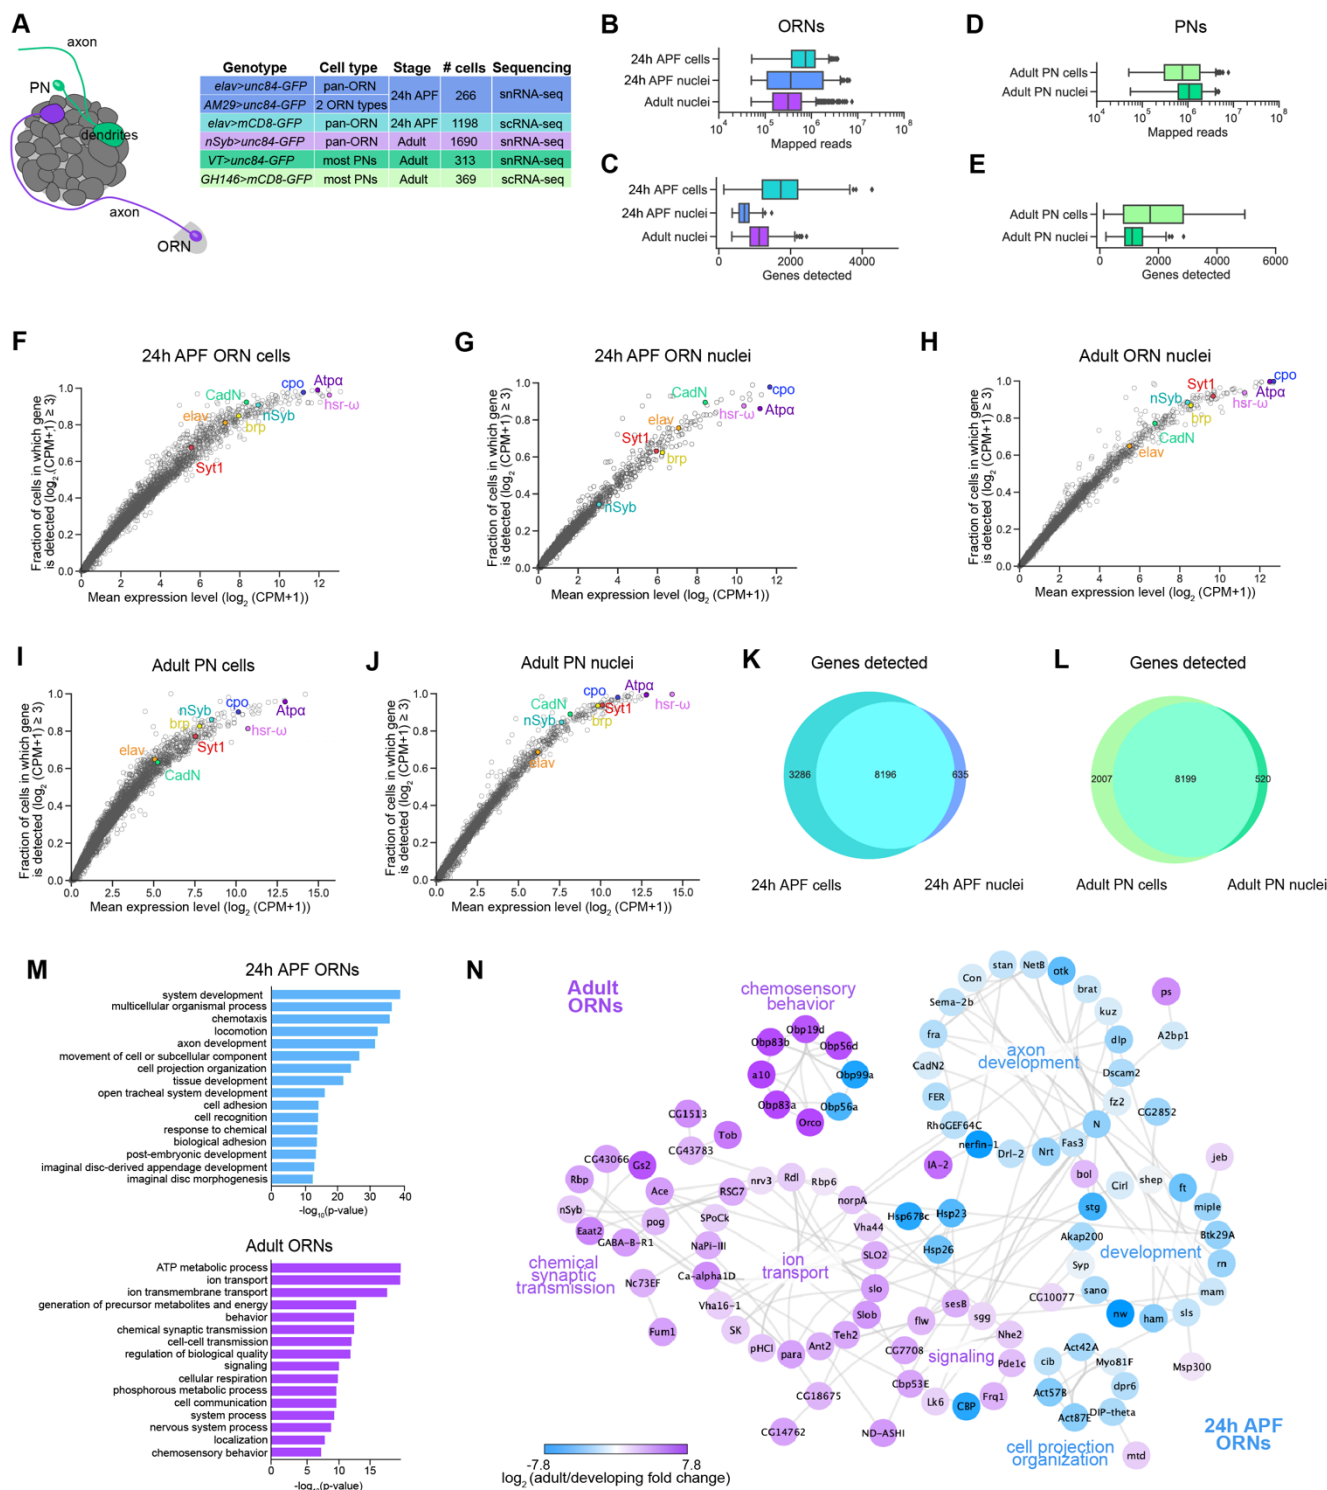

1259

1260

1261

1262

1263

**Figure 2.** Comparison of single-cell and single-nucleus RNA-seq. **(A)** Schematic depicting ORN axons and PN dendrites in the antennal lobe (left) and summary table of the cell types, number of cells, genotypes, and stages that were profiled using snRNA-seq and scRNA-seq. Note that 24h APF cells

McLaughlin et al.

1264 were labeled by intersecting *elav-GAL4* with *ey-FLP* and *UAS-FRT-STOP-FRT-mCD8-GFP*. The reason  
1265 there are fewer adult nuclei here than in Figure 1B is because some adult nuclei were labeled with lam-  
1266 GFP, but those nuclei were not included in analyses here (see Figure 5—supplement 1C). **(B–E)** Box  
1267 plots depicting uniquely-mapped reads (B, D) and detected genes (C, E) per cell/nucleus. Only exonic  
1268 reads are shown for RNAs in cells, whereas exonic and intronic reads are combined for nuclear  
1269 transcripts. **(F–J)** Mean expression level and detection rate of all genes in 24h APF ORNs (F), 24h APF  
1270 ORN nuclei (G), adult ORN nuclei (H), adult PN cells (I), and adult PN nuclei (J). Detection is defined as  
1271  $\log_2(\text{CPM}+1) \geq 3$ . Detection failure events can occur due to (1) the gene not being expressed in the cell;  
1272 (2) gene dropouts resulting from technical artifacts even though mRNA transcripts are present; or (3)  
1273 gene expression is below detection threshold. Colored circles represent the five neuronal markers used  
1274 for quality control filtering (Figure 1E) and three house-keeping genes. **(K–L)** Venn diagram comparing  
1275 all genes detected using scRNA-seq and snRNA-seq in 24h APF antennal neurons (J) and in adult PNs  
1276 (K). Expression was defined as  $\log_2(\text{CPM} + 1) \geq 2$ . **(M)** Gene ontology (GO) analysis based on the top  
1277 ~400 genes enriched in 24h ORN nuclei compared to adult ORN nuclei (top) and GO analysis of top  
1278 ~400 genes enriched in adult ORN nuclei compared to 24h APF nuclei (bottom). Top GO 16 terms are  
1279 shown. **(N)** STRING plot showing gene networks of 24h APF and adult ORN nuclei.  
1280

McLaughlin et al.

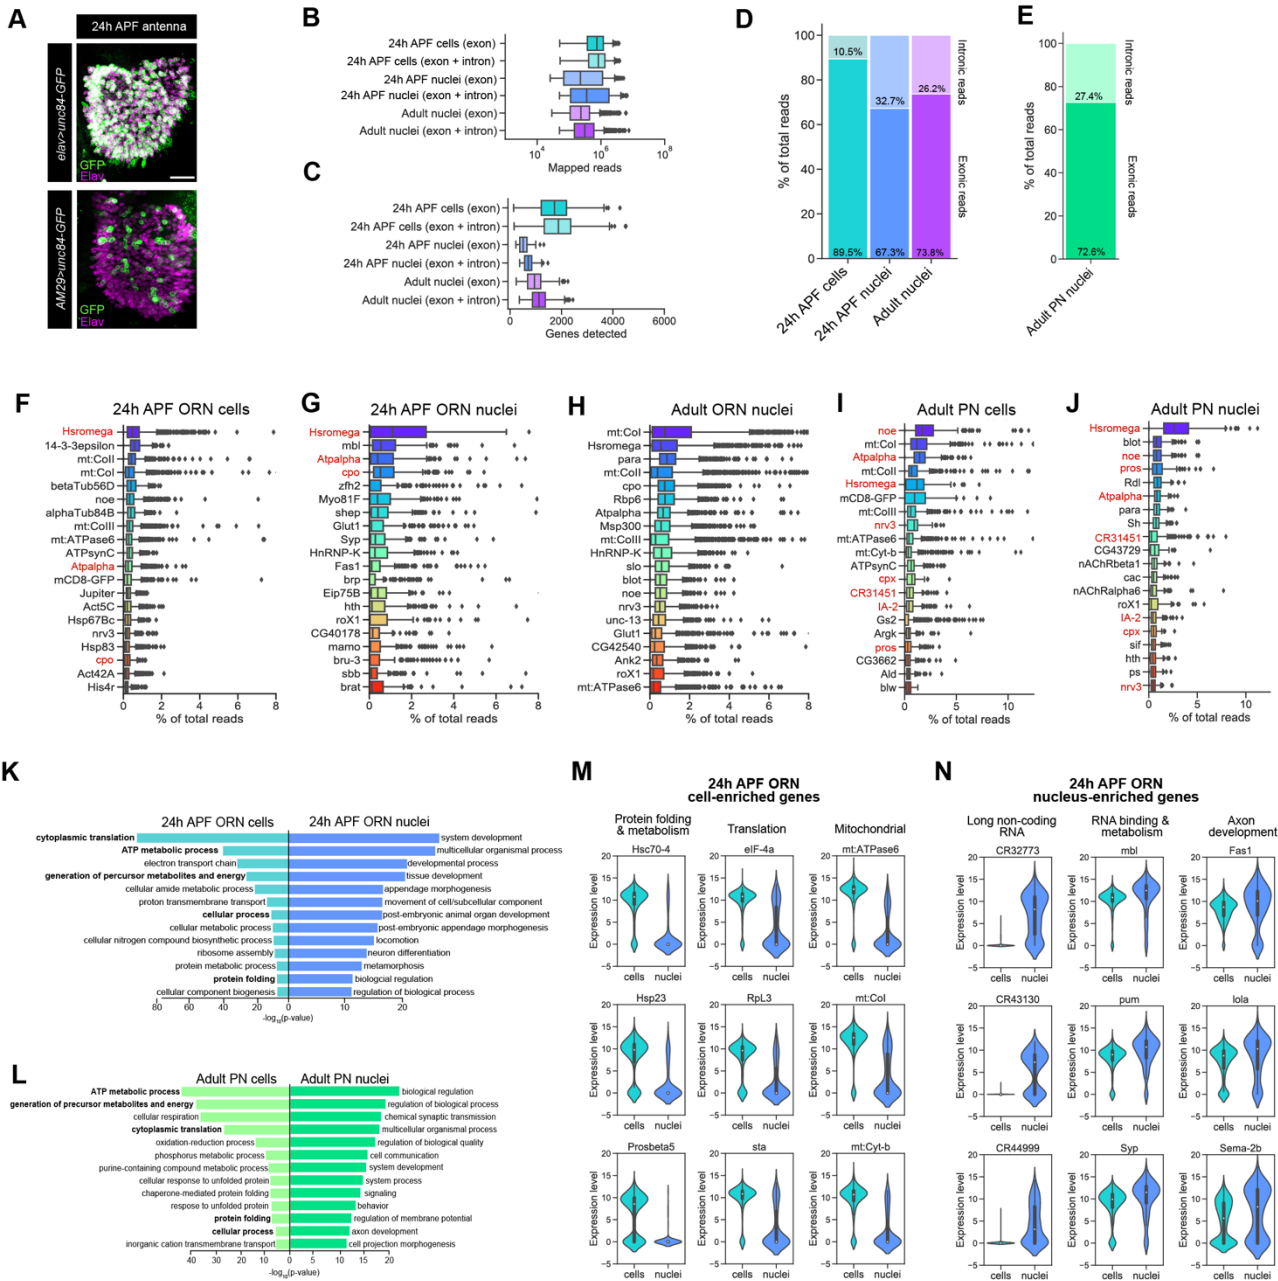

1281  
1282  
1283  
1284  
1285  
1286  
1287  
1288  
1289  
1290  
1291  
1292

**Figure 2—supplement 1.** Additional comparisons of scRNA-seq and snRNA-seq protocols. **(A)** Confocal images showing expression of the nuclear envelop protein Unc84-GFP in the antenna driven by *eIav-GAL4* and *AM29-GAL4*; anti-GFP labeling is in green and anti-Elav (pan-neuronal nuclear marker) labeling is in magenta. Scale bar, 20  $\mu$ m. **(B–C)** Box plots showing distribution of uniquely-mapped reads (B) and genes detected (C) per cell/nucleus in ORNs. These plots depict a breakdown of all cells/nuclei with exonic reads only and exonic and intronic reads combined. Analyses in Figure 2 and the rest of the study were performed on cells with exonic reads only and nuclei with combined exonic and intronic reads. **(D–E)** Stacked bar plots of proportion of exonic and intronic reads in scRNA-seq and snRNA-seq samples where reads were combined in ORNs (D) and PNs (E). **(F–J)** Top 20 transcripts with highest percentage of total reads in 24h APF ORN cells (F), 24h APF ORN nuclei (G), adult ORN nuclei (H), adult PN cells



McLaughlin et al.

1293 (I), and adult PN nuclei (J). Note that top transcripts in adult ORN nuclei contain mitochondrial (mt)  
1294 transcripts, likely artifacts resulting from dissociation procedures. Transcripts shared between stage-  
1295 matched cells and nuclei are in red. **(K–L)** Gene ontology (GO) analysis based on genes enriched in 24h  
1296 APF ORN cells compared to 24h APF ORN nuclei (K) and adult PN cells compared to adult PN nuclei  
1297 (L). The top 13 significant GO terms are shown. ~500 DE genes were used for GO analysis in each  
1298 category. Bolded terms in the cell categories are shared between ORN and PN cells. **(M–N)**. Violin plots  
1299 showing cell-enriched (M) and nucleus-enriched (N) transcripts in each category in 24h APF ORNs. Note  
1300 that mitochondrial genes are more enriched in cells, whereas long non-coding RNAs are more highly  
1301 enriched in nuclei.  
1302

McLaughlin et al.

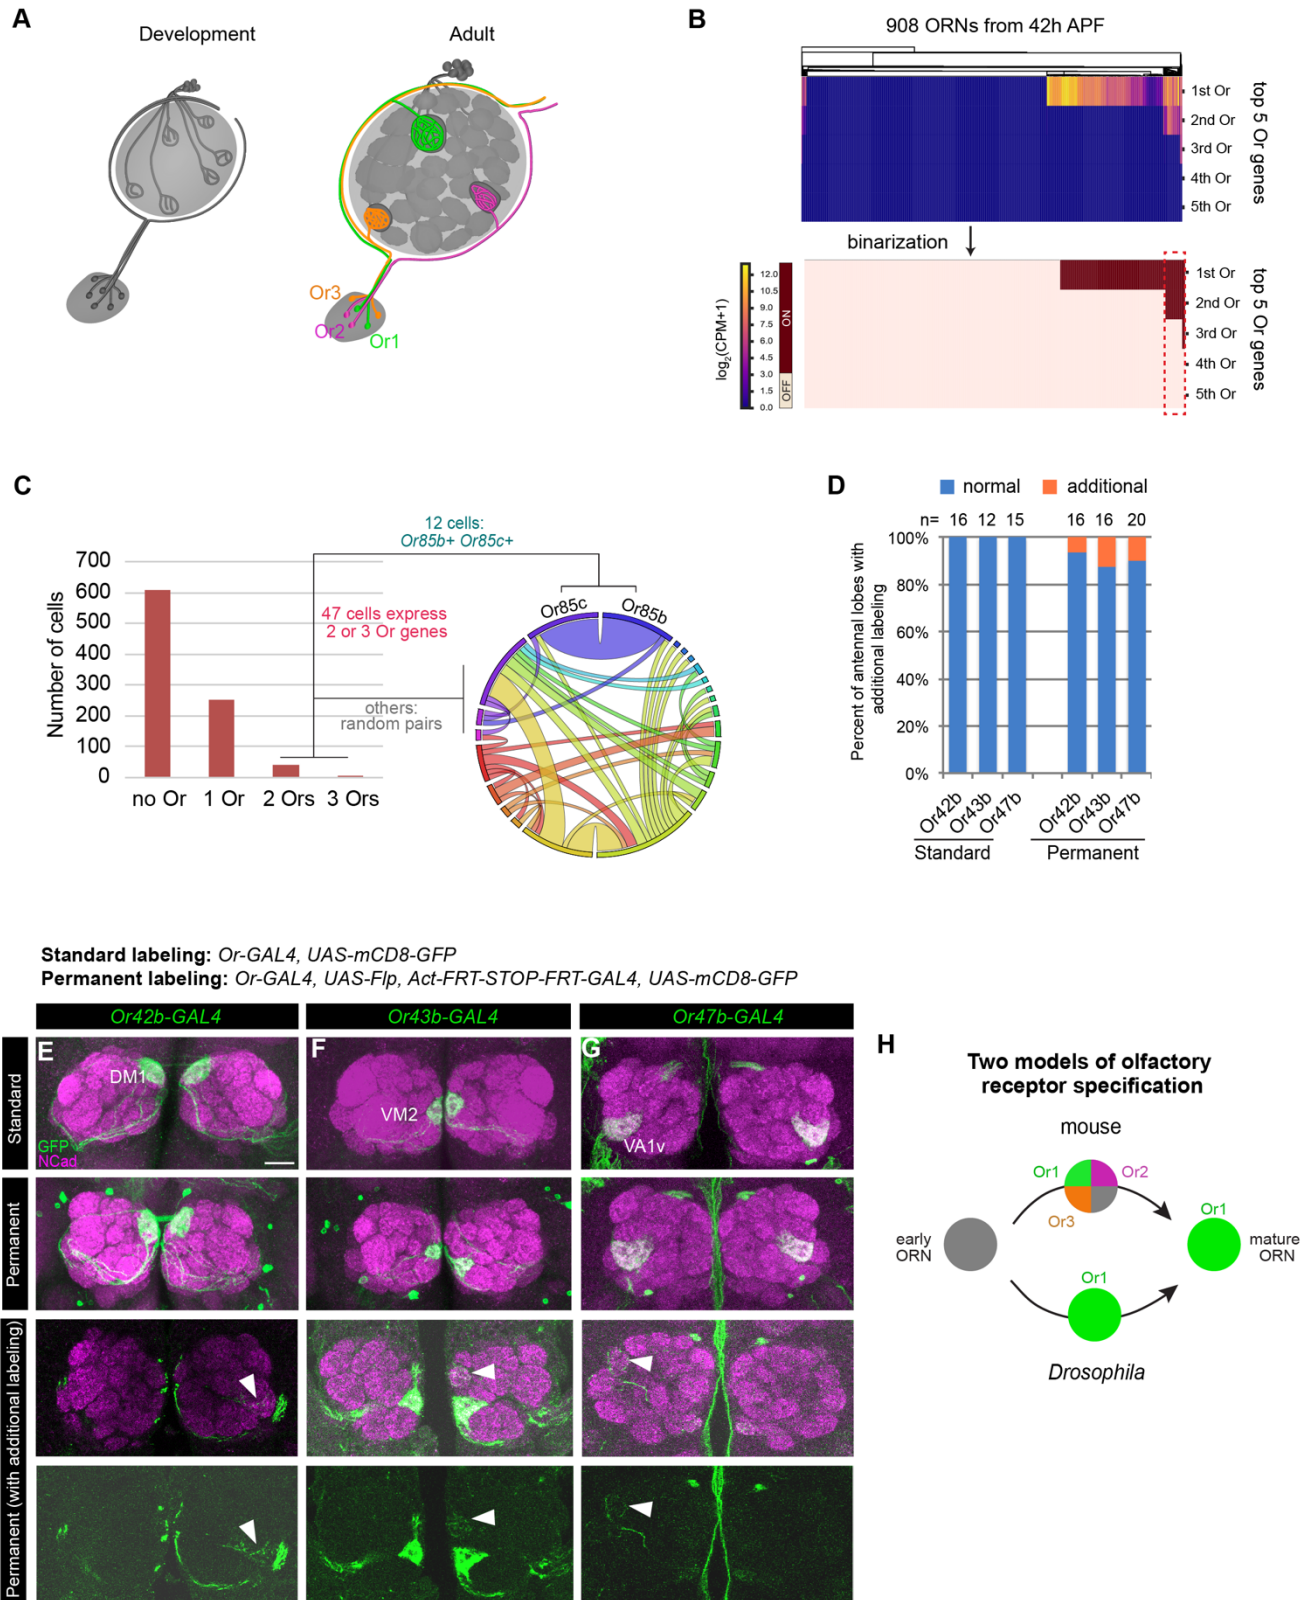

1303 **Figure 3.** Individual ORNs maintain the expression of the same olfactory receptor(s) throughout  
1304 development. (A) Schematic depicting ORNs at an early developmental stage (left) and in the mature

McLaughlin et al.

1305 circuit (right) where each ORN type expresses a distinct olfactory receptor represented by different colors.  
1306 **(B)** Heatmap (top) and binarization of heatmap (bottom) of the top 5 highest expressed olfactory receptors  
1307 in 908 *nSybGAL4>mCD8-GFP* positive ORNs from 42h APF. Olfactory receptors were considered “on”  
1308 if they were expressed at  $\log_2(\text{CPM}+1) \geq 3$ . **(C)** Quantification of the number of cells expressing zero,  
1309 one, two, or three olfactory receptors in 42h APF ORNs (left). Chord plot (right) of co-expressed receptors  
1310 in the 47 cells that expressed 2 or 3 olfactory receptors. Most co-expressed receptors show random  
1311 patterns. **(D)** Quantification of the percentage of antennal lobes that displayed labeling of additional  
1312 glomeruli in standard and permanent labeling conditions. **(E–G)** Confocal images of adult antennal lobes  
1313 labeled with anti-GFP (green) and anti-NCad (magenta) in standard labelling (top row) or permanent  
1314 labeling (bottom three rows) conditions of *Or42b-GAL4*-positive (E panels), *Or43b-GAL4*-positive (F  
1315 panels), *Or47b-GAL4*-positive (G panels) ORNs. Antennal lobes that showed labeling of additional  
1316 glomeruli are depicted in the last two rows. Arrowheads denote additional labeling. Scale bar, 20  $\mu\text{m}$ . **(H)**  
1317 Schematic depicting olfactory receptor specification in mice and *Drosophila*. Mouse ORNs express  
1318 multiple olfactory receptors before one predominates in mature ORNs (top; Hanchate et al., 2015; Tan  
1319 et al., 2015), whereas our data indicate that *Drosophila* ORNs select a single olfactory receptor to express  
1320 during development that is maintained in adulthood (bottom).  
1321  
1322

McLaughlin et al.

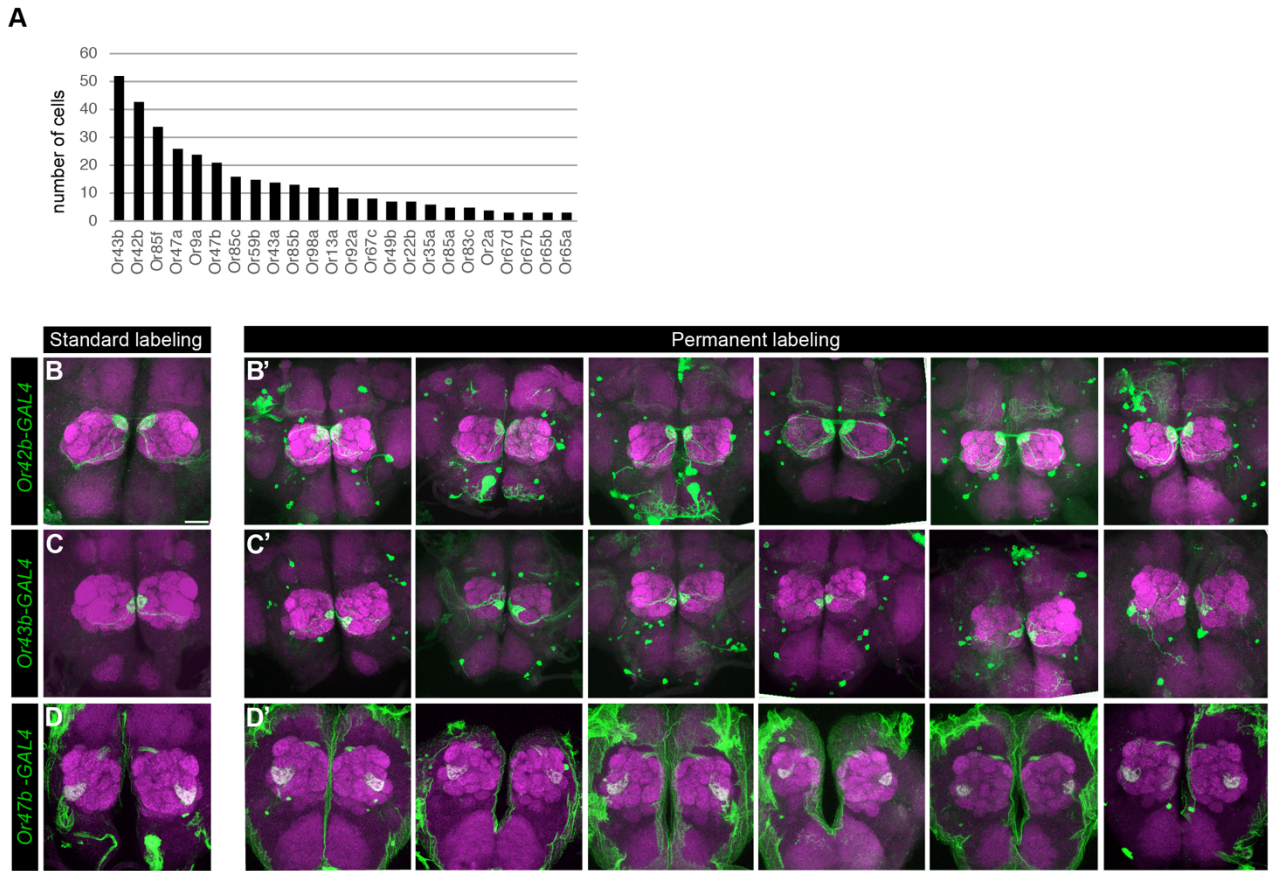

1323  
1324

1325 **Figure 3—supplement 1.** Permanent labeling reveals that *Drosophila* ORNs express the same receptor  
1326 across all developmental stages. **(A)** Quantification of number of cells expressing each olfactory receptor  
1327 in 42h APF ORNs. **(B–D')** Additional confocal images of adult antennal lobes labeled with anti-GFP  
1328 (green) and anti-NCad (magenta) in standard (B–D) and permanent labeling (B'–D') of *Or42b-GAL4*-  
1329 positive (B panels), *Or43b-GAL4*-positive (C panels), *Or47b-GAL4*-positive (D panels) ORNs. Scale bar,  
1330 20 μm.

1331

McLaughlin et al.

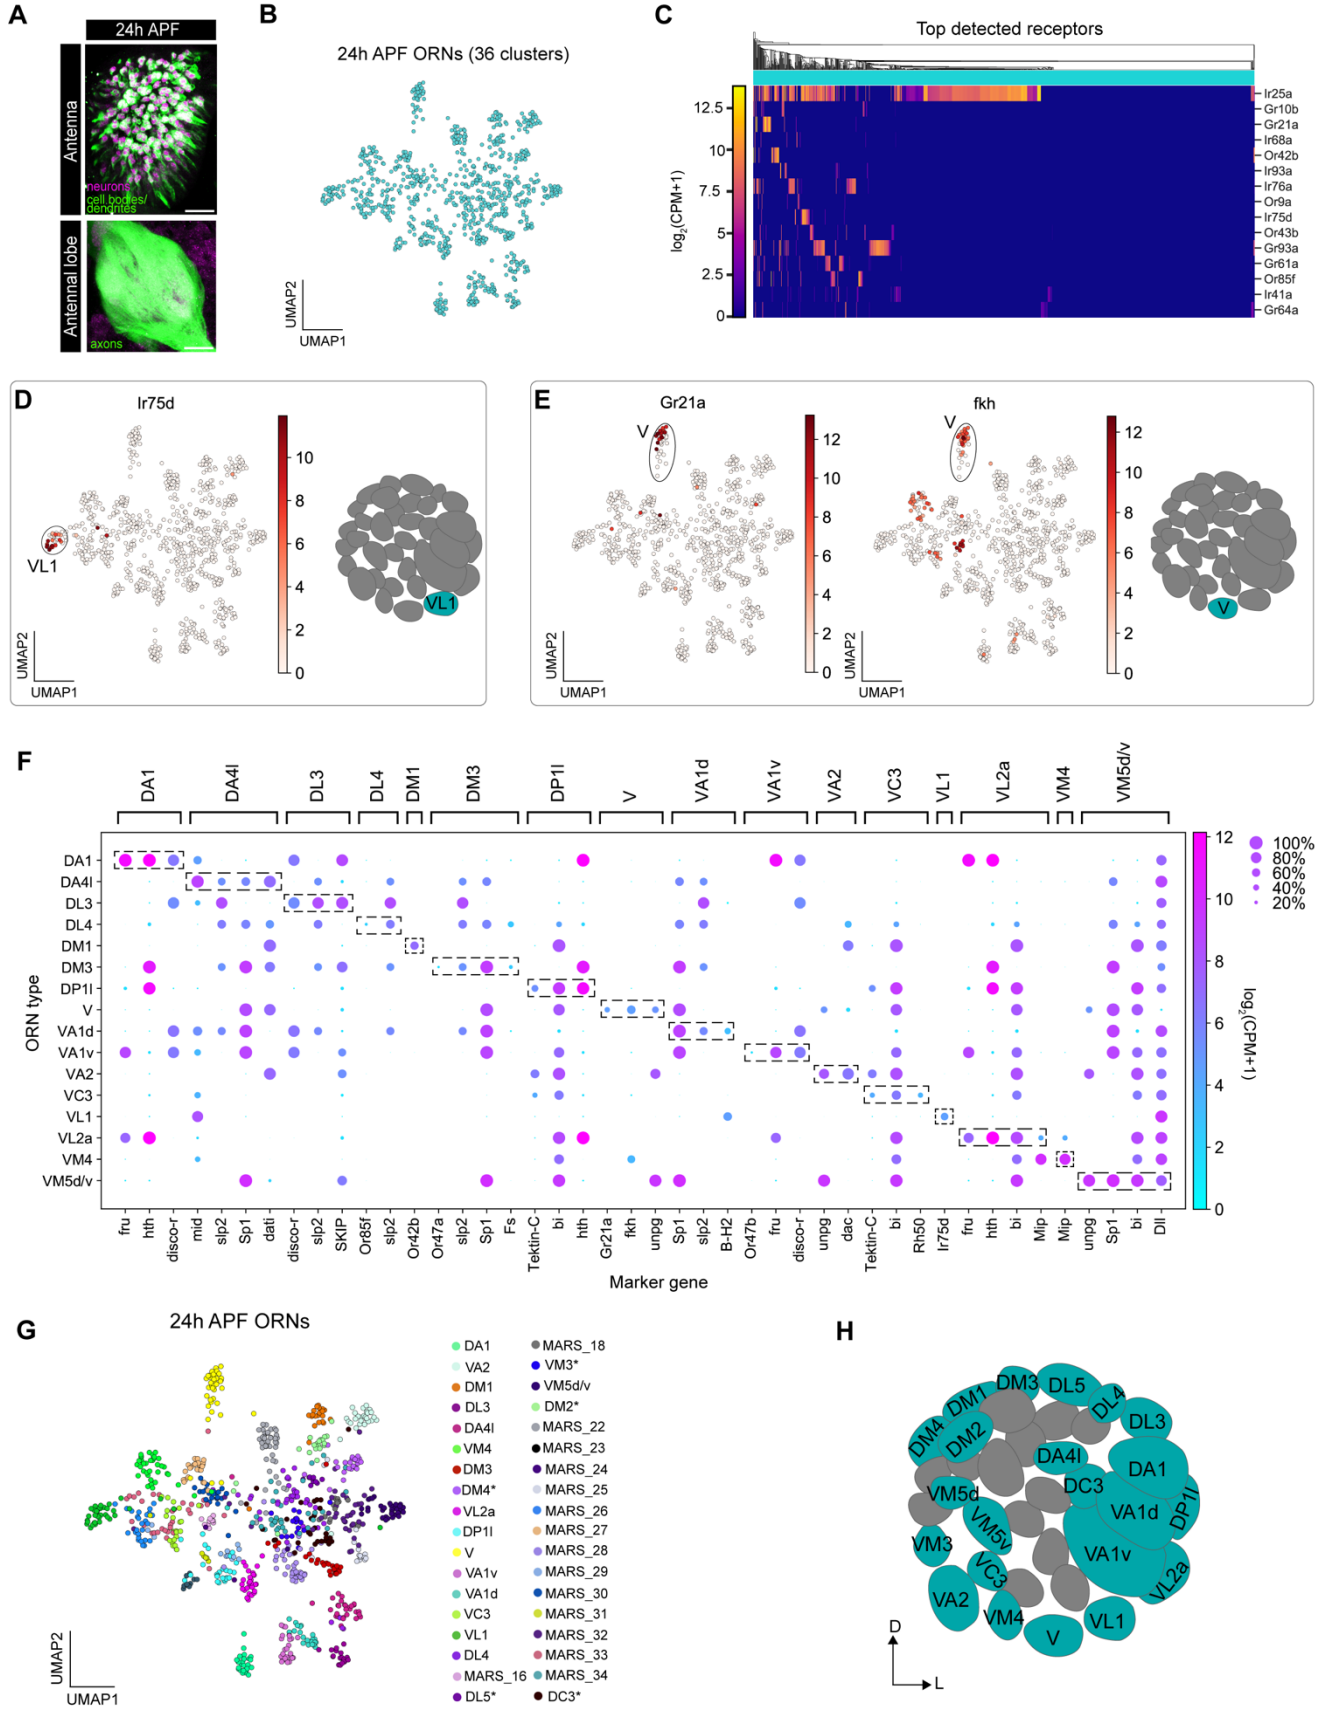

1332

McLaughlin et al.

1333 **Figure 4.** Mapping 24h APF transcriptomic clusters to their glomerular types. **(A)** Confocal images of  
1334 24h APF *elav-GAL4*, *ey-FLP*, *UAS-FRT-STOP-FRT-mCD8-GFP* neurons in the antenna (top) labeled  
1335 with anti-GFP (green) and anti-Elav (magenta) and antennal lobe (bottom) labeled with anti-GFP (green).  
1336 Scale bar, 20  $\mu\text{m}$ . **(B)** UMAP plot depicting 36 clusters of 24h APF ORNs. Only *acj6*-positive neurons  
1337 were used for this analysis. Dimensionality reduction was performed using differentially expressed genes  
1338 from 42h APF combined with olfactory receptors for a total of 335 genes. **(C)** Heatmap depicting the top  
1339 detected olfactory receptors in 24h APF neurons; detection threshold was defined as  $\log_2(\text{CPM}+1) \geq 3$  in  
1340  $> 5$  neurons. **(D)** UMAP plot depicting *Ir75d* expression in a single cluster (left). *Ir75d*-positive ORNs  
1341 target their axons to the VL1 glomerulus as shown in the schematic (right). **(E)** UMAP plots (left) depicting  
1342 *Gr21a* expression in a single cluster and *fkh* expression in the same cluster. *Gr21a*-positive neurons  
1343 target their axons to the V glomerulus and *fkh* is a marker expressed in V neurons at 24h and 42h APF.  
1344 Schematic of glomerular projection of V neurons (right). **(F)** Dot plot summarizing the markers used to  
1345 map 17 transcriptomic clusters at 24h APF to their corresponding 42h APF clusters. Each dot represents:  
1346 mean expression within each cluster (color) and fraction of cells within the cluster expressing the gene  
1347 (dot size). Dashed boxes around dots highlight markers used to map 24h APF clusters to 42h APF ones.  
1348 **(G)** UMAP plot depicting the 22 transcriptomic clusters that were decoded at 24h APF. Asterisk next to  
1349 ORN type indicates that it was annotated using data presented in Figure 6. Note that VM5d/v could not  
1350 be separated (see Figure 4—supplement 2). The identity of clusters marked “MARS\_#” is unknown. **(H)**  
1351 Schematic depicting the glomerular targeting patterns of the 22 transcriptomic clusters mapped in (F–G;  
1352 and Figure 6). Heatmap scale bars are in  $\log_2(\text{CPM}+1)$ .  
1353

McLaughlin et al.

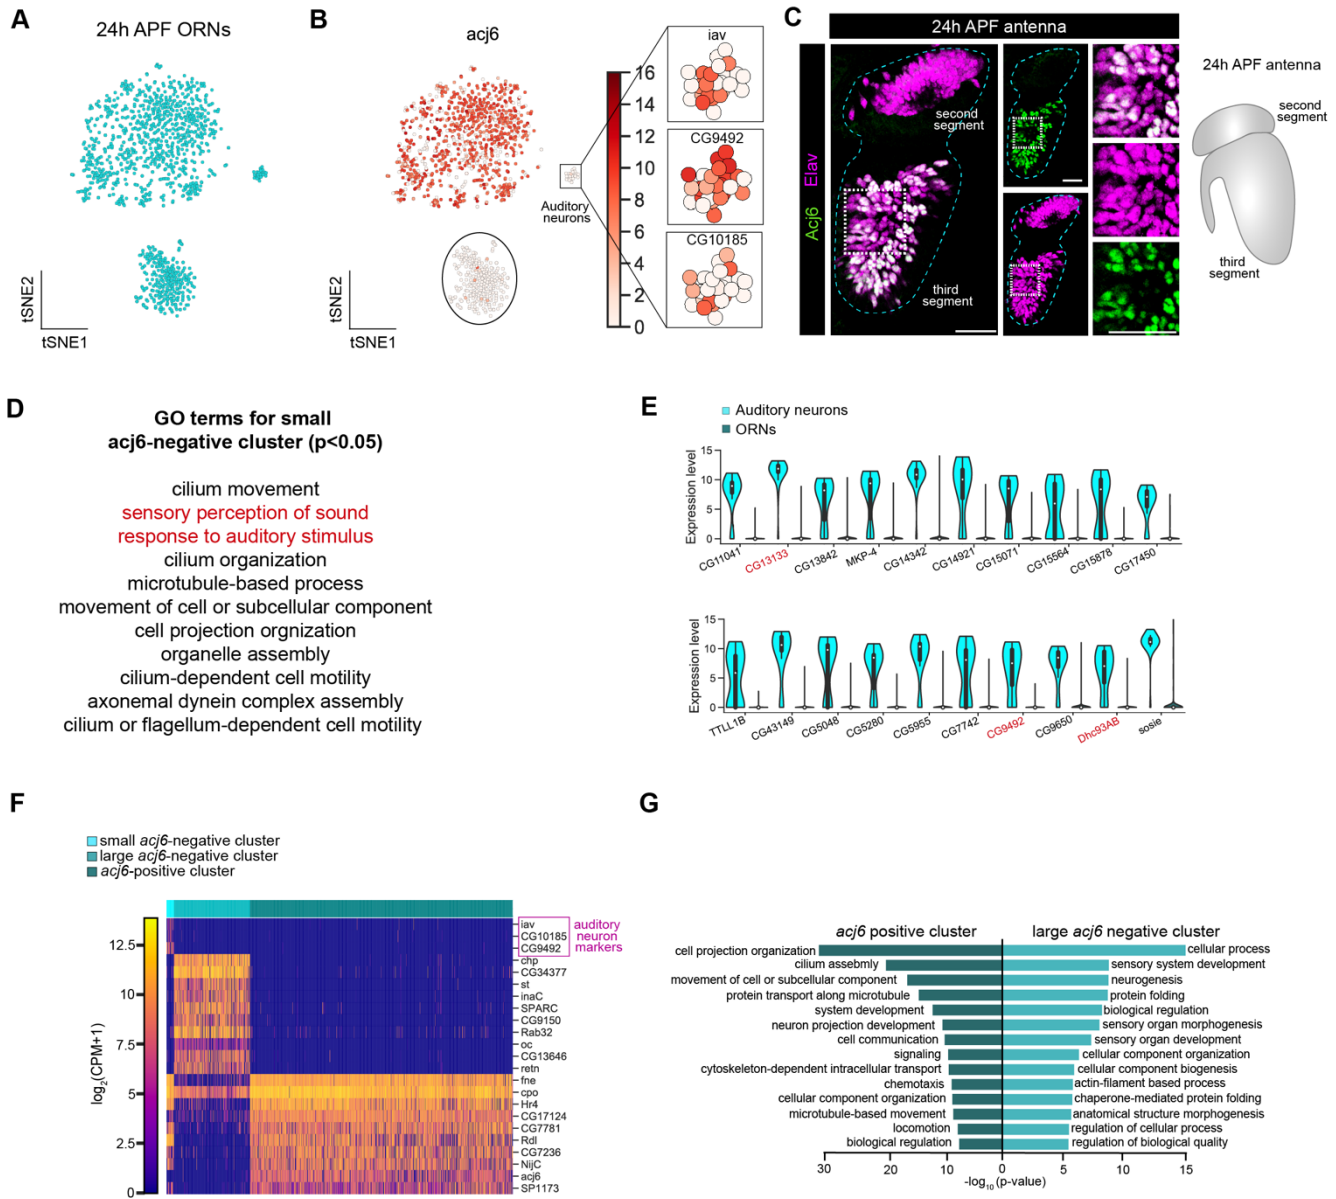

1354

1355

1356

1357

1358

1359

1360

1361

1362

1363

1364

1365

1366

1367

**Figure 4—supplement 1.** Two developmental states of 24h APF ORNs. **(A)** t-SNE plot showing that ORNs cluster into two large and one small population(s) of cells when dimensionality reduction was performed using the top 500 over-dispersed genes. **(B)** t-SNE plot of *acj6* in 24h APF neurons (left). Expression of three auditory neuron markers *iav*, *CG9492*, *CG10185* (right) in the small *acj6*-negative cluster. These markers are essentially absent from the two larger clusters in this plot. **(C)** Confocal images (left) of 24h APF antenna co-labeled with anti-Acj6 (green) and anti-Elav (magenta). Some cells are Elav-positive but Acj6-negative in the third antennal segment (zoomed-in panels to the right). White squares denote the location where zoomed in panels were obtained. Schematic of 24h APF antennal anatomy (far right). Scale bars, 20  $\mu\text{m}$ . **(D)** List of GO terms enriched in the small *acj6*-negative cluster derived from the top 110 highest expressed genes in that cluster. Red terms are auditory organ-specific. **(E)** Violin plots of the top auditory-neuron enriched genes. Genes in red have known expression or function in auditory organs. **(F)** Heatmap depicting auditory neuron markers (top 3 genes; marked with magenta); top 10 DE genes between *acj6*<sup>+</sup> and large *acj6*<sup>-</sup> cluster (middle 10 genes), and the top 10 highest

McLaughlin et al.

1368 expressed genes in the *acj6*<sup>+</sup> cluster compared to the large *acj6*<sup>-</sup> cluster (last 10 genes). (G) Gene  
1369 ontology (GO) analysis based on > 500 differentially expressed genes between *acj6*<sup>+</sup> and the large *acj6*<sup>-</sup>  
1370 cluster. Top 14 significant GO terms are shown.  
1371



McLaughlin et al.

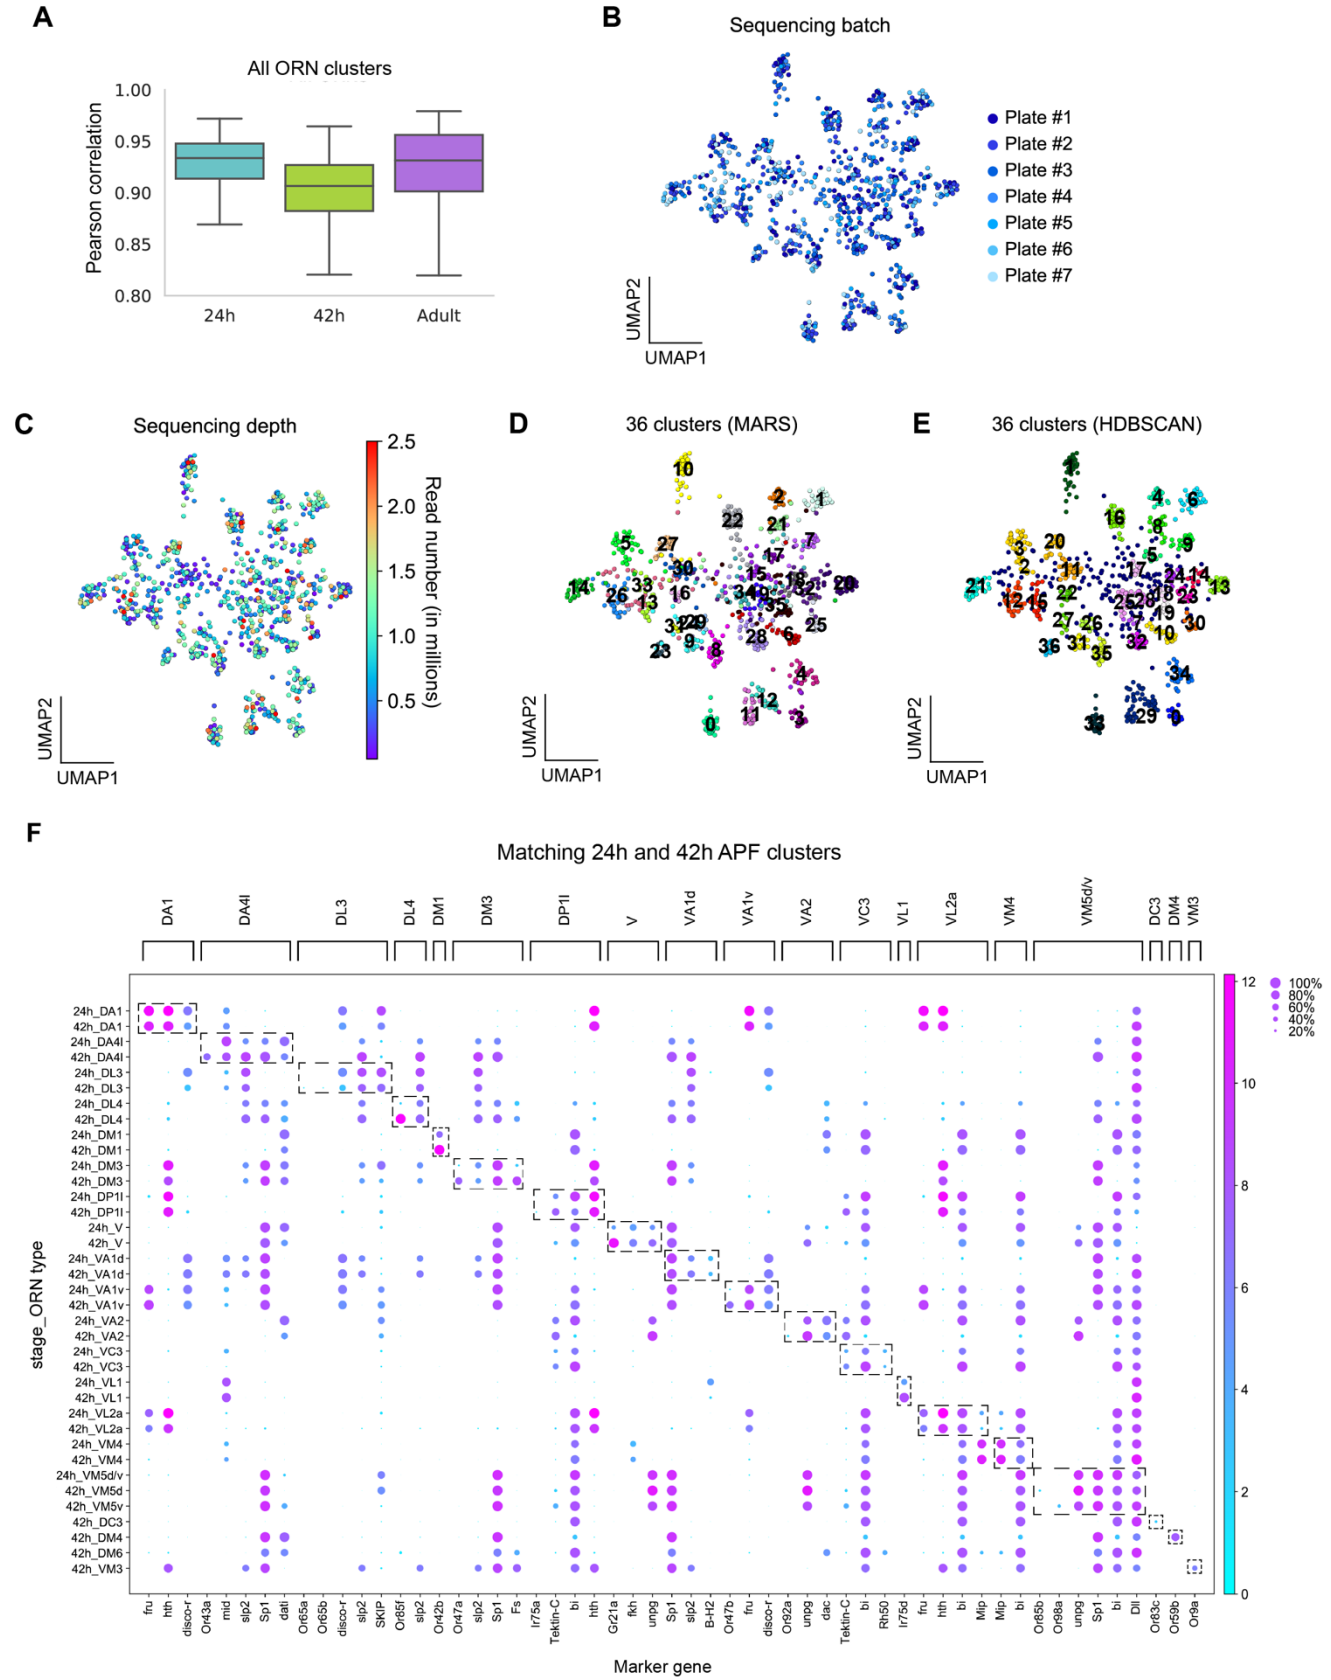

McLaughlin et al.

1373 **Figure 4—supplement 2.** Quality control and additional analysis of 24h APF transcriptomes. **(A)**  
1374 Quantification of cluster-level transcriptomic similarity of all ORN clusters annotated in this study and in  
1375 Li et al., 2020 using Pearson's correlation. 416 differentially expressed genes identified from all three  
1376 stages were used for this analysis. **(B–C)** UMAP plots depicting 24h APF neurons color-coded by  
1377 sequencing batch (plate #; B) and colored with a heat map depicting read number (C). **(D–E)** UMAP plots  
1378 comparing MARS clustering (D) with HDBSCAN density-based clustering (E) approaches. MARS is  
1379 better able to separate VA1v and VA1d [clusters # 11 and 12 in (D) and cluster # 29 in (E)]. **(F)** Dot plot  
1380 showing expression of the markers used to match 24h APF ORNs to 42h APF ORNs. Some 42h APF  
1381 clusters express olfactory receptors that are not found in 24h APF clusters. Receptors/markers of DM6  
1382 ORNs are not shown because sequencing of a cells labeled with a GAL4 driver was used to decode this  
1383 cluster at 42h APF (Li et al., 2020). Dashed boxes highlight the markers for each cluster. Each dot  
1384 represents: mean expression within each cluster (color) and fraction of cells within the cluster expressing  
1385 the gene (dot size). Note this plot also depicts 42h APF DC3, DM4, DM6, and VM3 clusters as they were  
1386 decoded in Li et al., 2020 but we were not able to annotate these clusters until Figure 6.  
1387

McLaughlin et al.

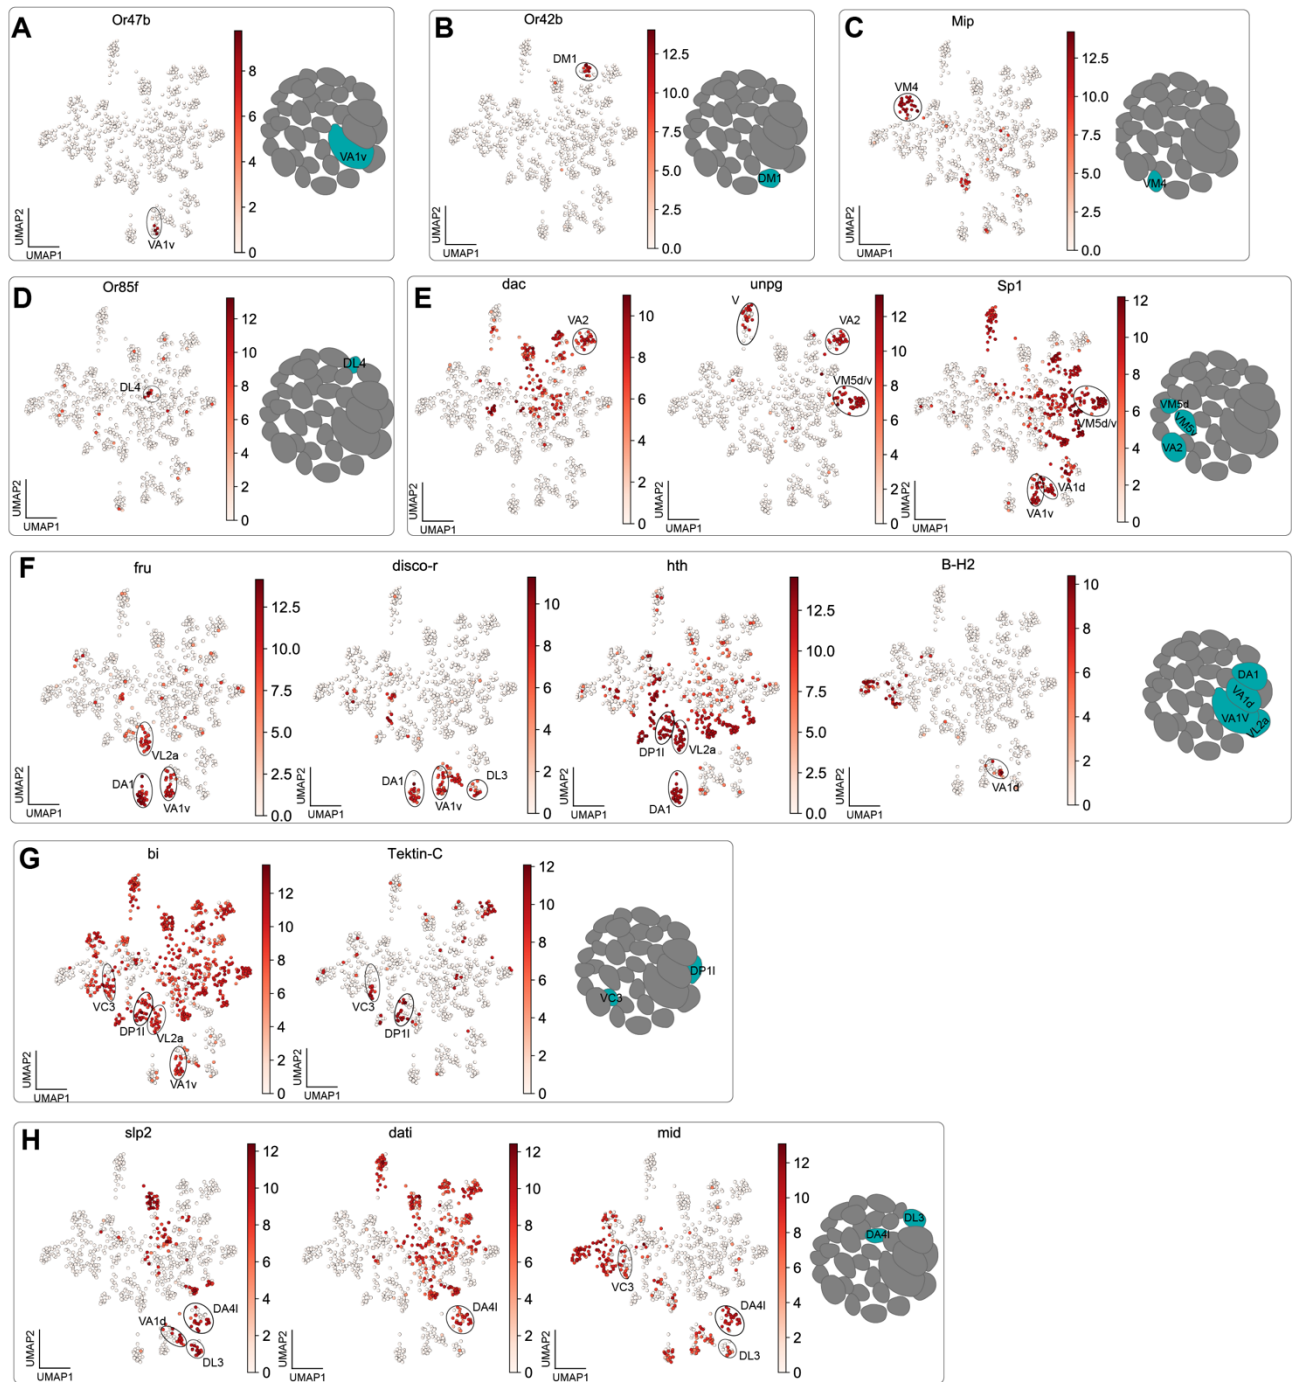

1388  
1389  
1390  
1391  
1392  
1393

**Figure 4—supplement 3.** Markers used to match 24h APF antennal neurons to their glomerular type. (A–H) In each panel, a UMAP plot showing the gene(s) used to annotate clusters is next to a schematic depicting the glomerular target(s) of annotated neuron type(s). Heatmap scale bars are in  $\log_2(\text{CPM} + 1)$ .

McLaughlin et al.

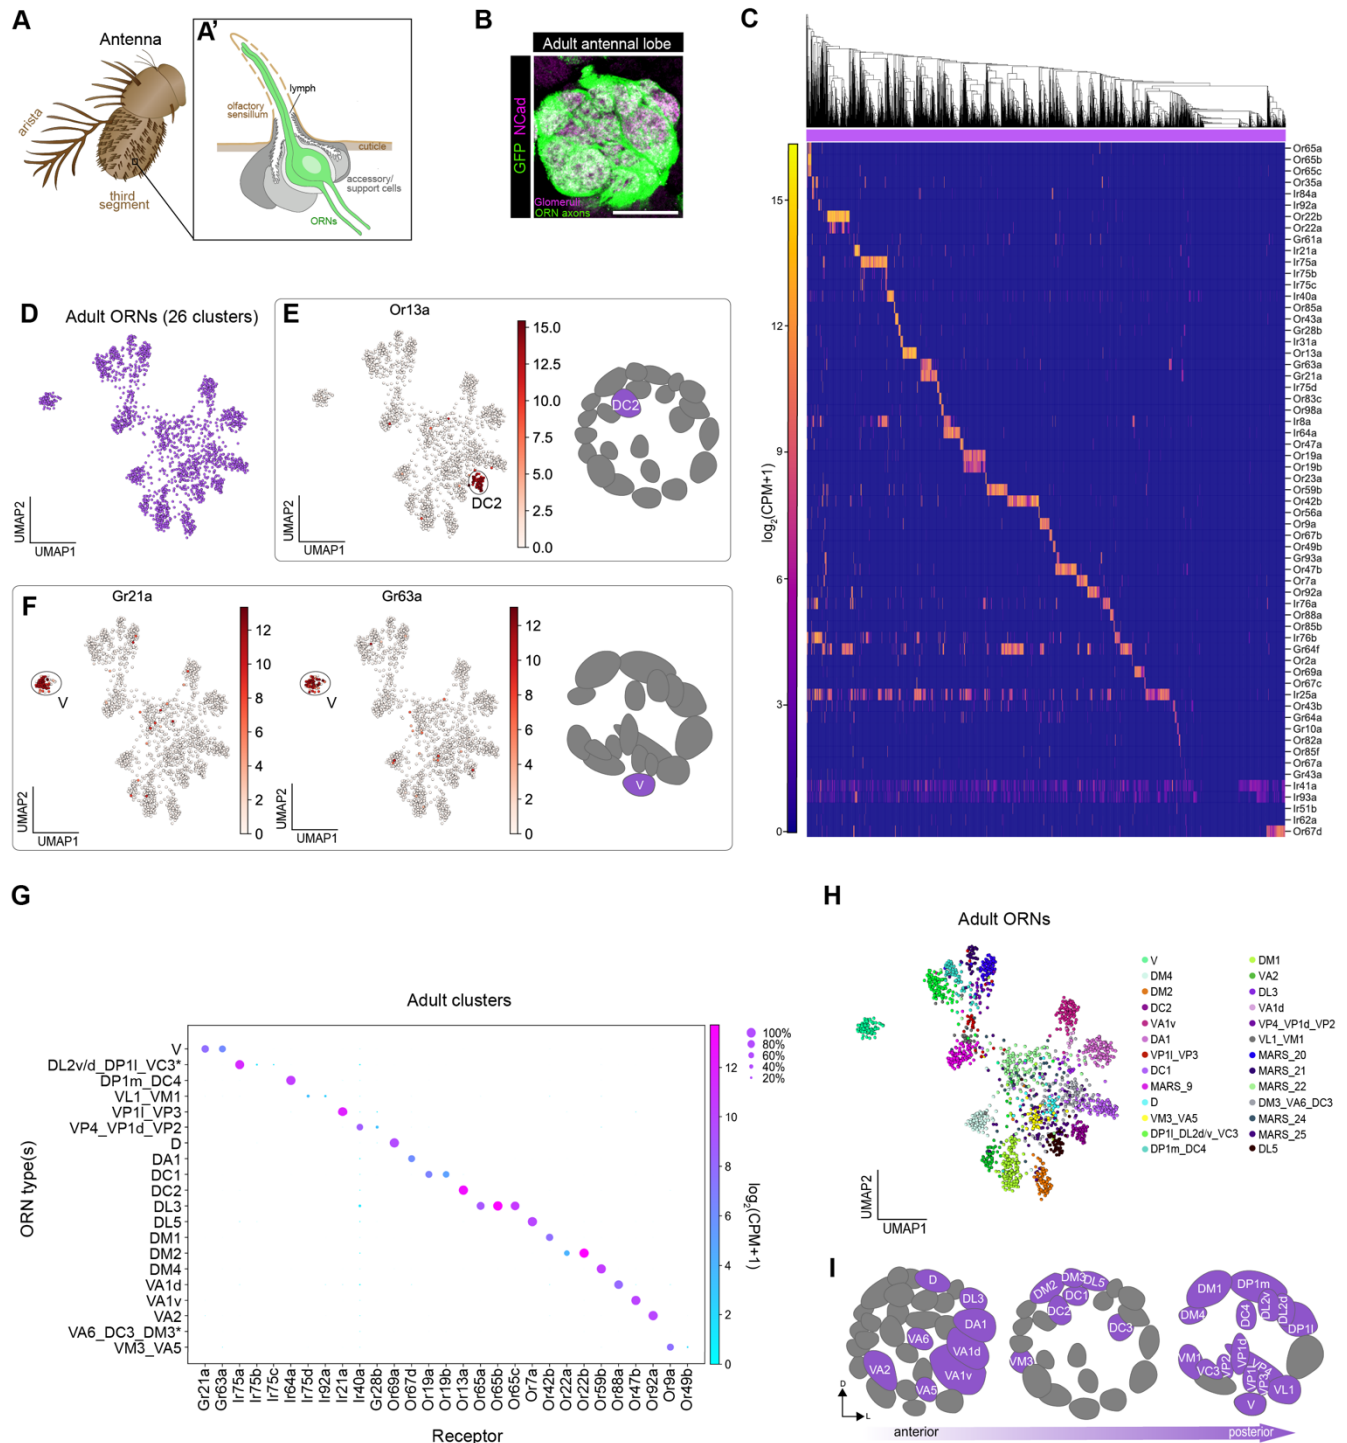

**Figure 5.** Mapping adult transcriptomic clusters to their glomerular types. **(A–A')** Diagram of the adult antenna **(A)** and the structure of an individual sensillum **(A')** where ORN dendrites and support cells are located. **(B)** Confocal image of *nSyb-GAL4; ey-FLP; UAS-FRT-STOP-FRT-mCD8-GFP* neuron axons in the antennal lobe labeled with anti-GFP (green) and anti-NCad (magenta). Scale bar, 40  $\mu$ m. **(C)** Heatmap showing the expression of all detected sensory receptors belonging to the Or (odorant receptor), Gr (gustatory receptor), and Ir (ionotropic receptor) families. A detected receptor is defined as

1394  
1395  
1396  
1397  
1398  
1399  
1400  
1401

McLaughlin et al.

1402 expression at a level of  $\log_2(\text{CPM}+1) \geq 3$  in  $> 5$  cells. **(D)** UMAP plot depicting 26 clusters of adult ORNs.  
1403 Dimensionality reduction was performed using differentially expressed genes from 42h APF combined  
1404 with olfactory receptors for a total of 335 genes. **(E–F)** UMAP plots depicting (E) *Or13a* expression in a  
1405 single cluster (left) and glomerular projection of *Or13a*-positive DC2 ORNs (right), and (F) *Gr21a/Gr63a*  
1406 expression in a single cluster (left) glomerular projection of *Gr21a/Gr63a*-positive V neurons (right). **(G)**  
1407 Dot plot depicting sensory receptors used to annotate adult neuron clusters. Clusters containing multiple  
1408 neuron types are indicated by an underscore separating the names of each type. Each dot represents:  
1409 mean expression within each cluster (color) and fraction of cells within the cluster expressing the gene  
1410 (dot size). Asterisk next to VA6\_DC3\_DM3 and DP1I\_DL2d/v\_VC3 clusters indicates that some or all of  
1411 receptors for these cell types are expressed in a small non-overlapping percentage of cells and can be  
1412 better resolved on a UMAP plot (see Figure 5—supplement 2K, M). **(H)** UMAP plot of 21 clusters  
1413 annotated to 31 neuron types using antennal chemosensory receptor expression. Note that some clusters  
1414 contain receptors of multiple ORN types and are labeled as such. The glomerular identity of clusters  
1415 marked “MARS\_#” is unknown. **(I)** Schematic of the glomerular targets of the 31 neuron types mapped  
1416 in (G–H).  
1417

McLaughlin et al.

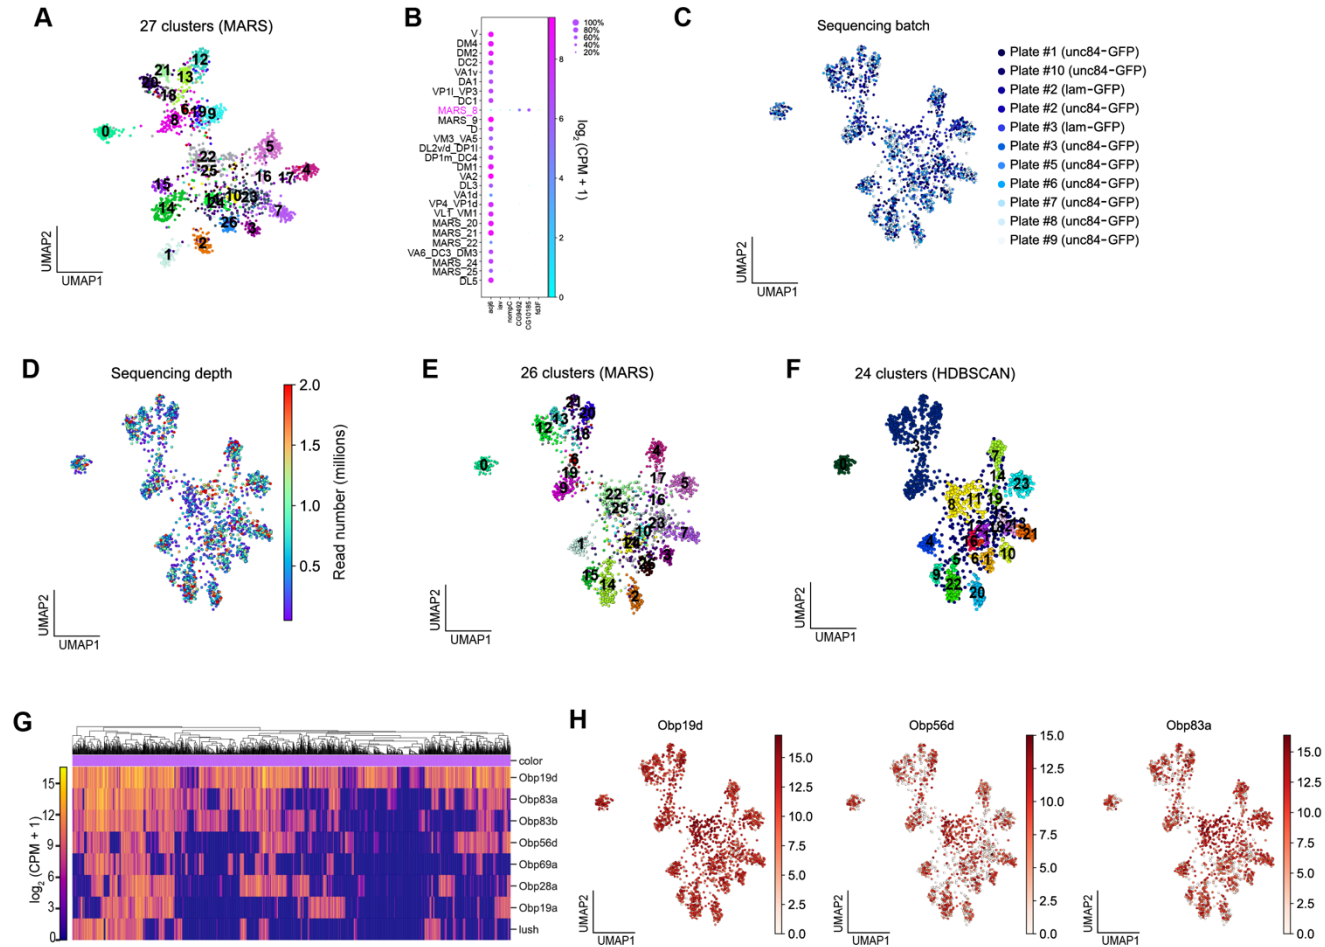

1418  
1419

**Figure 5—supplement 1.** Quality control and additional analysis of adult transcriptomes. **(A–B)** UMAP plot of 27 clusters of adult neurons; note that MARS\_8 was removed from subsequent analysis because it was found to express auditory neuron genes and not the ORN gene, *acj6*, shown in the dot plot (B). **(C–D)** UMAP plots depicting adult transcriptomes color coded by sequencing batch (plate #; C) and sequencing depth (D). Note that we included some adult nuclei labeled with lam-GFP to increase cell type representation in the adult data. **(E–F)** UMAP plots comparing MARS (E) with HDBSCAN density-based clustering (F). Both algorithms yield mostly concordant results for Or-expressing clusters; however, MARS predictions are better able to separate Ir-expressing clusters [compare top clusters in (E) with the same clusters in (F)]. **(G–H)** Heatmap depicting odorant binding protein (*Obp*) expression (G) and UMAP plots of select *Obps* showing that these genes are broadly expressed in adult neurons (H). Heatmap scale bars are in  $\log_2(\text{CPM} + 1)$ .

McLaughlin et al.

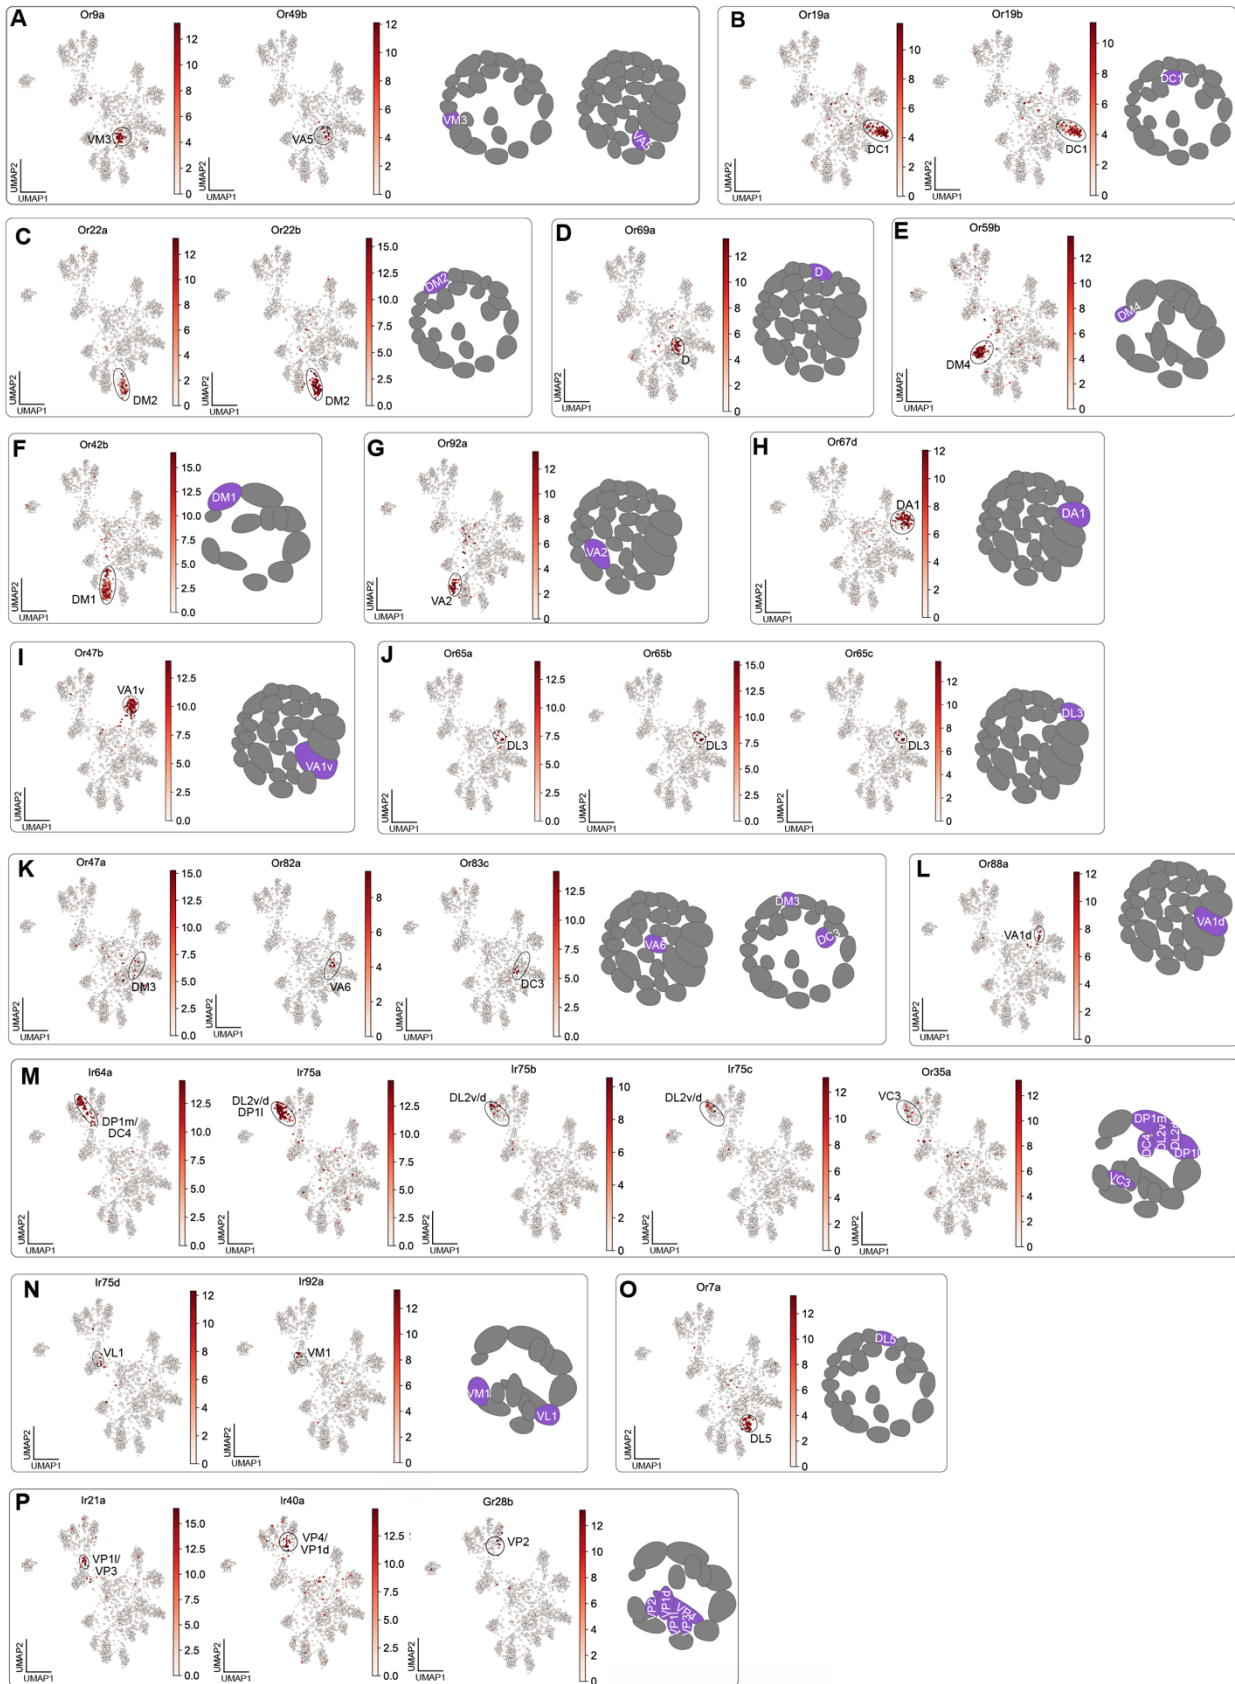

McLaughlin et al.

1432 **Figure 5—supplement 2.** Cluster-specific sensory receptor expression in adult transcriptomes. **(A–P)**  
1433 UMAP plots of sensory receptors used to annotate adult sensory neuron clusters. In each panel, a UMAP  
1434 plot showing the gene(s) used to annotate clusters is placed next to a schematic showing the glomerular  
1435 target(s) of decoded neuron type(s). Heatmap scale bars are in  $\log_2(\text{CPM} + 1)$ .  
1436



McLaughlin et al.

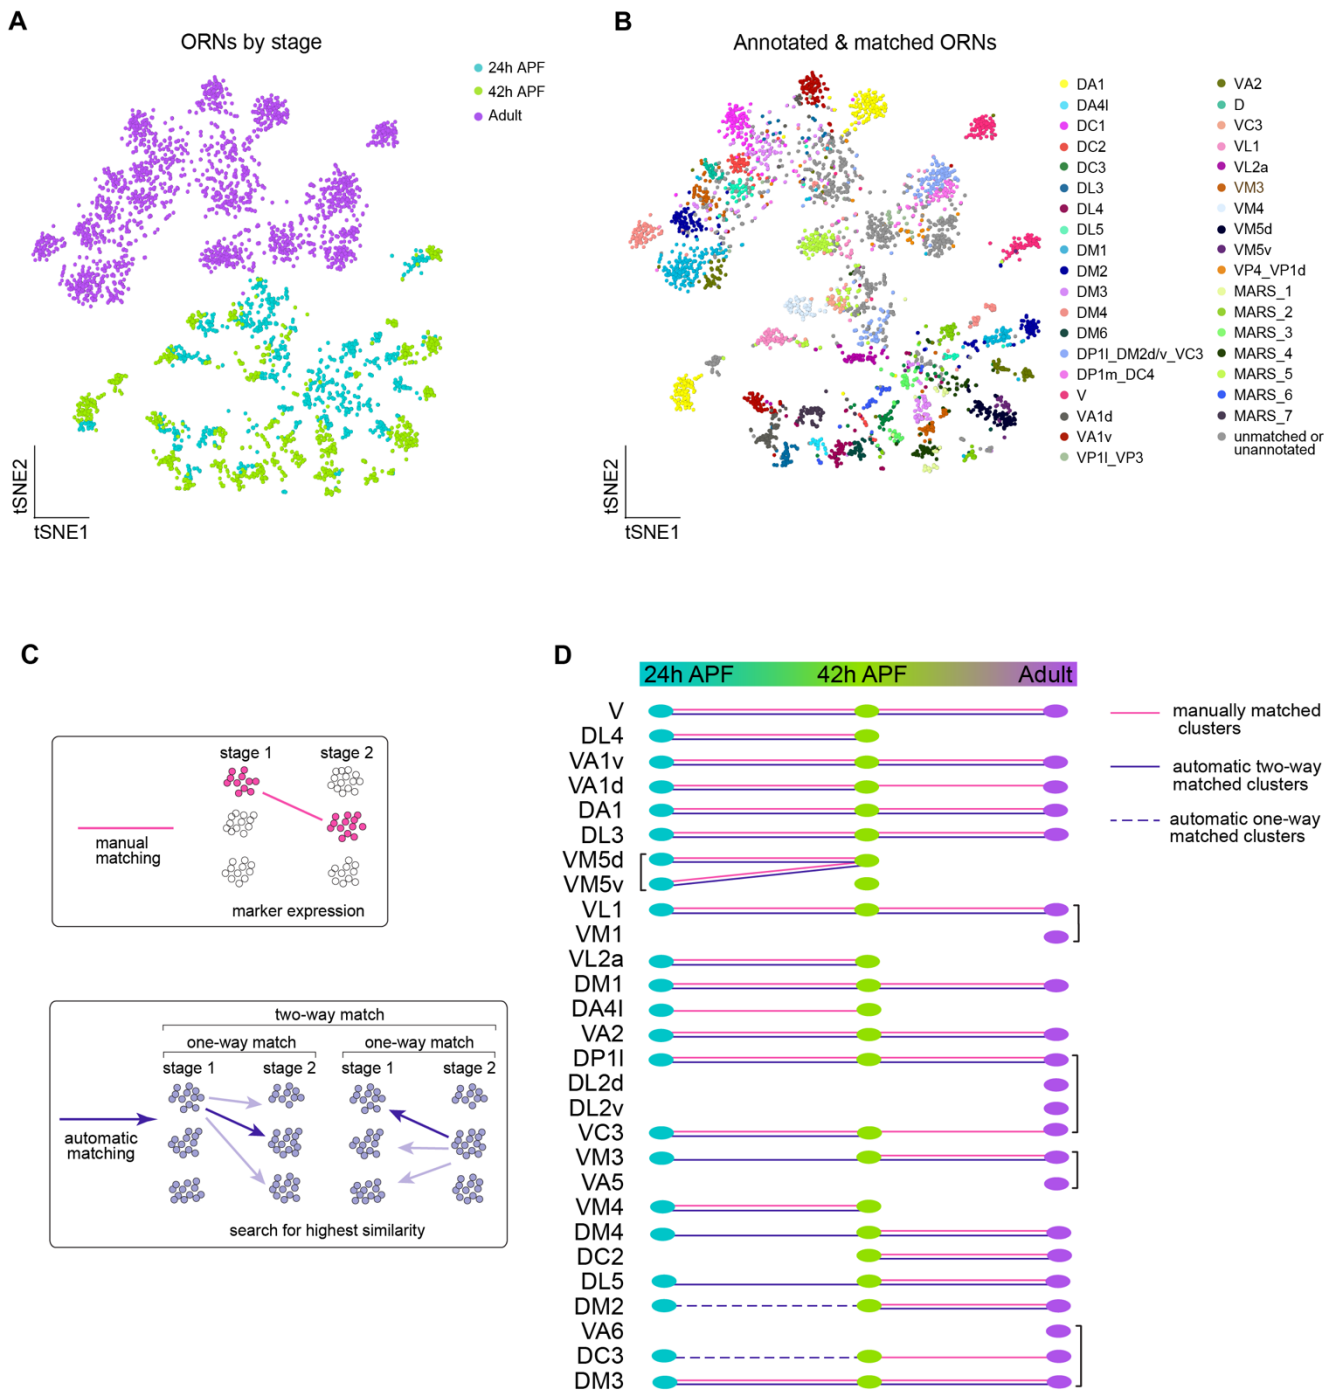

1437  
1438

1439 **Figure 6.** Matching transcriptomic clusters across all stages enabled annotation of additional ORN types.  
1440 (A–B) t-SNE plots of ORNs from the three stages profiled in this study: 24h APF, 42h APF, and adult (A)  
1441 and annotated and/or matched ORNs across these stages (B). Clusters marked “MARS\_#” are matched  
1442 but their glomerular identity is unknown. Dimensionality reduction was performed using differentially  
1443 expressed genes from 42h APF combined with olfactory receptors for a total of 335 genes. (C) Schematic  
1444 summarizing the two approaches that were used for matching ORNs from different stages: 1) manual

McLaughlin et al.

1445 matching using cluster-specific markers/olfactory receptors (top); and 2) automatic matching by  
1446 calculating the transcriptome similarity between one cluster at a certain stage to all clusters from another  
1447 stage (bottom). (D) Summary of all matched ORN types from 3 different stages, the method used to  
1448 match clusters is represented by the type of line (color, solid, dashed) linking the clusters between  
1449 timepoints. Cell types in brackets indicate that they all mapped to a single cluster at that stage.  
1450

McLaughlin et al.

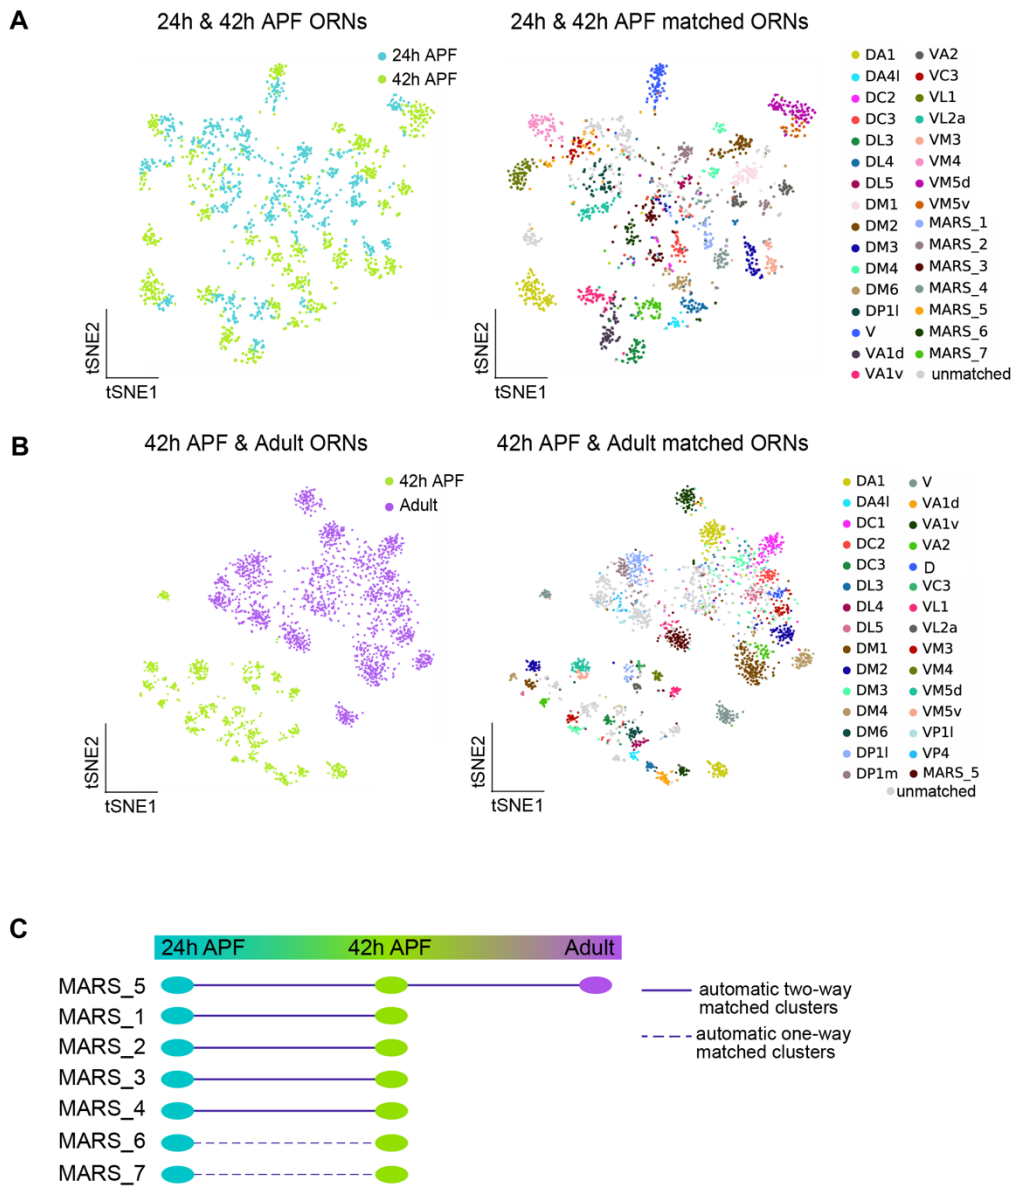

1451  
1452  
1453  
1454  
1455  
1456  
1457  
1458  
1459  
1460  
1461  
1462  
1463  
1464  
1465

**Figure 6—supplement 1.** Additional evidence for cluster matching across developmental stages. **(A)** t-SNE plots depicting 24h APF and 42h APF ORNs (left) and matched clusters between these two timepoints (right). Dimensionality reduction was performed using differentially expressed genes from 42h APF combined with olfactory receptors for a total of 335 genes. “MARS\_#” are matched between both timepoints but their glomerular identity is unknown. **(B)** t-SNE plots depicting 42h APF and adult ORNs (left) and matched clusters between these two timepoints (right). Dimensionality reduction was performed using differentially expressed genes from 42h APF combined with olfactory receptors for a total of 335 genes. MARS\_5 is matched across all three timepoints but its glomerular identity is unknown. **(C)** Summary of matched ORN types where the glomerular identity of these clusters is unknown.



McLaughlin et al.

1473 differentially expressed genes from 42h APF combined with olfactory receptors for a total of 335 genes.  
1474 **(E–G)** Quantification of cluster-level similarity of neurons in each sensillar class that were matched in  
1475 Figure 6 at each developmental stage corresponding to: antennal trichoid sensillar class (E), large  
1476 basiconic sensillar class (F), and thin small basiconic sensillar class (G). 416 DE genes identified from  
1477 all three stages were used for this analysis. **(H)** Schematic summary of ORNs, thermosensory and  
1478 hygrosensory neurons within their respective antennal sensillar class/structure, the sensory receptors  
1479 each neuron type expresses, and the category of cues each type predominantly responds to. White  
1480 dotted neurons have been mapped to their respective transcriptomic cluster at 24h APF, blue neurons  
1481 have been mapped to their transcriptomic cluster in adults, and blue dotted neurons have been mapped  
1482 at all stages. Receptors in blue were detected in either 24h APF or adult datasets. Sensory cues marked  
1483 with asterisks indicate that they are putative stimuli for this neuron type. See references below for  
1484 information regarding glomerular projection/receptor expressed (Couto et al., 2005; Fishilevich &  
1485 Vosshall, 2005; Grabe et al., 2016; Marin et al., 2020) and cues detected (Yao et al., 2005; Hallem &  
1486 Carlson, 2006; van der Goes van Naters & Carlson, 2007; Kurtovic et al., 2007; Kwon et al., 2007;  
1487 Semmelhack & Wang, 2009; Silbering et al., 2011; Gallio et al., 2011; Ronderos et al., 2014; Ebrahim et  
1488 al., 2015; Lin et al., 2015; Enjin et al., 2016; Budelli et al., 2019). **(I–J)** Dendrograms of 24h APF (I) and  
1489 adult (J) neuron types that resulted from hierarchical clustering of transcriptomes based on differentially  
1490 expressed genes at each time point. Axon trajectory/projection information is from (Endo et al., 2007; Joo  
1491 et al., 2013; Silbering et al., 2011; Rybak et al., 2016). The following abbreviations were used to describe  
1492 the stimuli adult neurons respond to: Phero. = pheromones; Am = amines; Ac = acids; and Temp. =  
1493 temperature (and humidity sensing VP4 neurons). Some adult clusters contain multiple neuron types, but  
1494 these clusters are within the same sensillar class or detect the same cues.  
1495

McLaughlin et al.

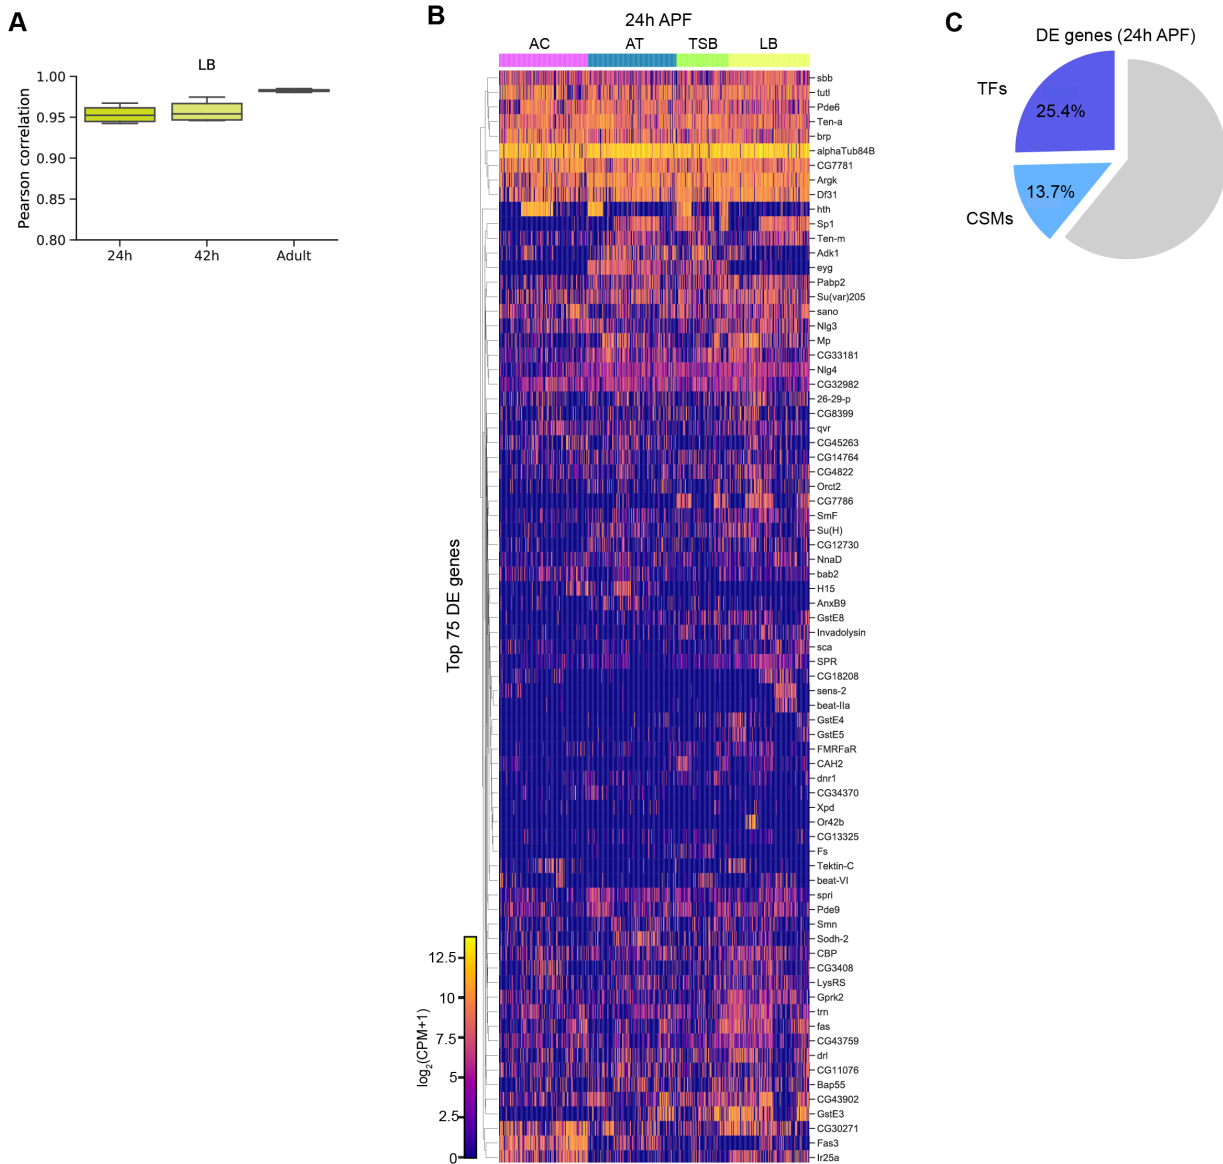

1496  
1497  
1498  
1499  
1500  
1501  
1502  
1503  
1504

**Figure 7—supplement 1.** Comparisons of 24h APF ORNs by sensillar class. **(A)** Quantification of cluster-level similarity of ORNs within the large basiconic sensillar class excluding V neurons, at all stages profiled. **(B)** Heatmap of top 75 differentially expressed genes in 24h APF ORNs grouped by sensillar class. **(C)** Quantification of the percentage of TFs and CSMs in the 437 differentially expressed genes used to cluster 24h APF transcriptomes in (Figure 7I).

McLaughlin et al.

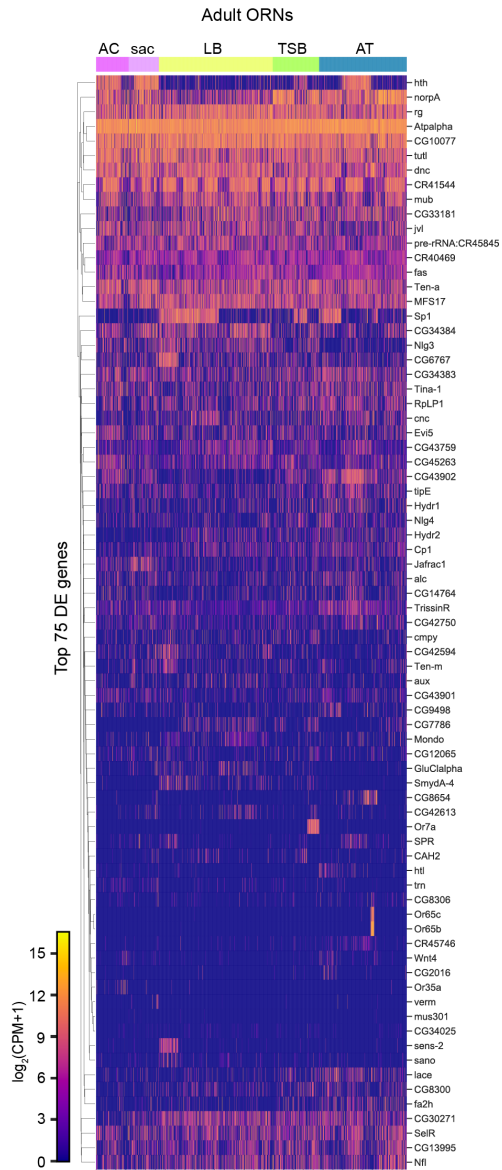

1505  
1506  
1507  
1508  
1509

**Figure 7—supplement 2.** Comparisons of adult neurons by sensillar class and sensory structure. Heatmap of the top 75 differentially expressed genes in adult neurons grouped by sensory structure.

McLaughlin et al.

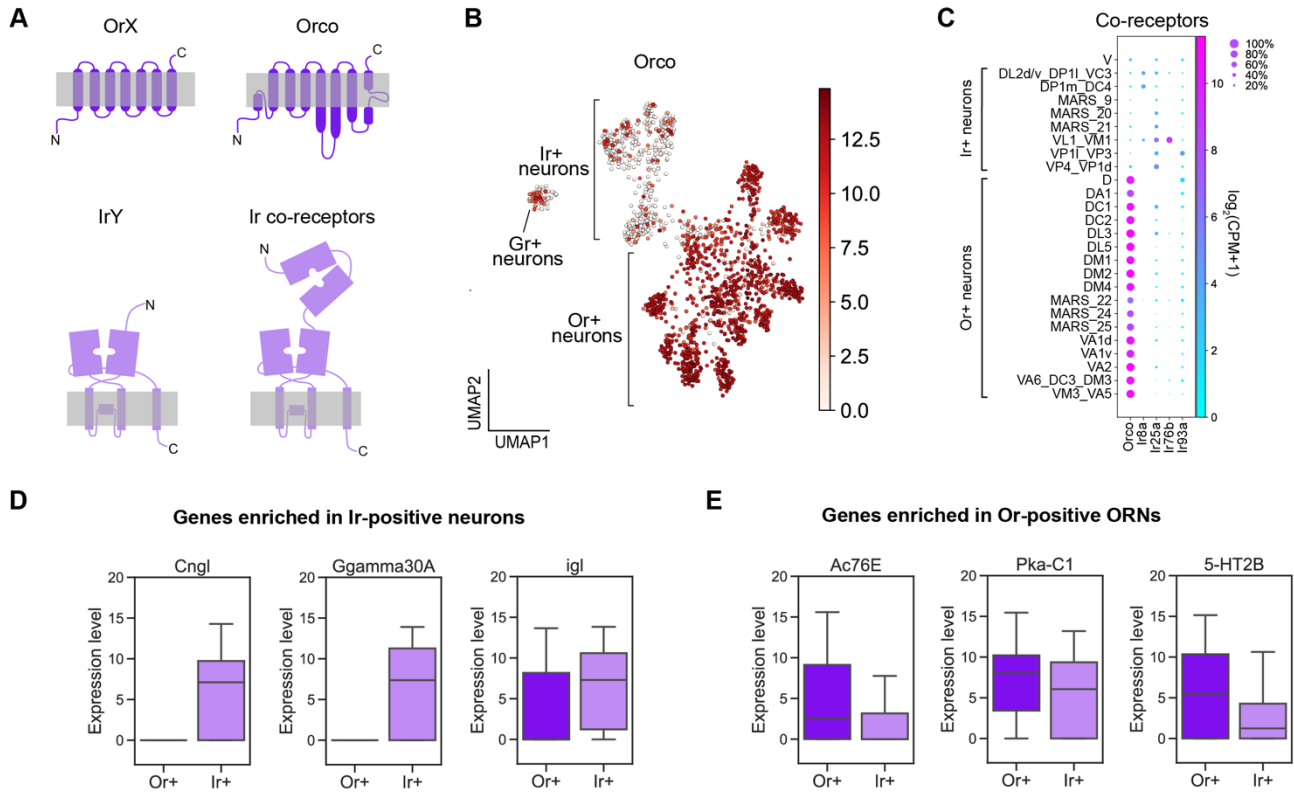

**Figure 8.** Transcriptomic differences between Or-expressing and Ir-expressing antennal neurons. **(A)** Schematic of two classes of *Drosophila* sensory receptors. OrX (odorant receptors) and their co-receptor Orco are seven-pass transmembrane receptors (top). IrY (ionotropic receptors) and their co-receptors are relatives of ionotropic glutamate receptors. Orco diagram is based on Butterwick et al., 2018 and Ir/Ir co-receptor diagram is based on Abuin et al., 2019. **(B)** UMAP plot depicting *Orco* expression in adult antennal neurons. Dimensionality reduction was performed using previously described methods. Ir-positive and Or-positive classifications were based on both sensory receptor expression and *Orco* expression level within a cluster. Since *Orco* is known to be a Or co-receptor we used high *Orco* expression reveal Or-positive clusters that did not express an identifying receptor, and *Orco* low clusters were annotated as Ir-positive. **(C)** Dot plot depicting Or and Ir co-receptor expression in adult clusters. Clusters containing multiple neuron types are noted using an underscore to separate names of each type. MARS clusters were included because *Orco* expression within these clusters indicates whether they should express an Or or Ir. Each dot represents: mean expression within each cluster (color) and fraction of cells within the cluster expressing the gene (dot size). **(D–E)** Box plots depicting differentially expressed genes between Ir-positive and Or-positive clusters.

1510  
1511  
1512  
1513  
1514  
1515  
1516  
1517  
1518  
1519  
1520  
1521  
1522  
1523  
1524  
1525  
1526  
1527



McLaughlin et al.

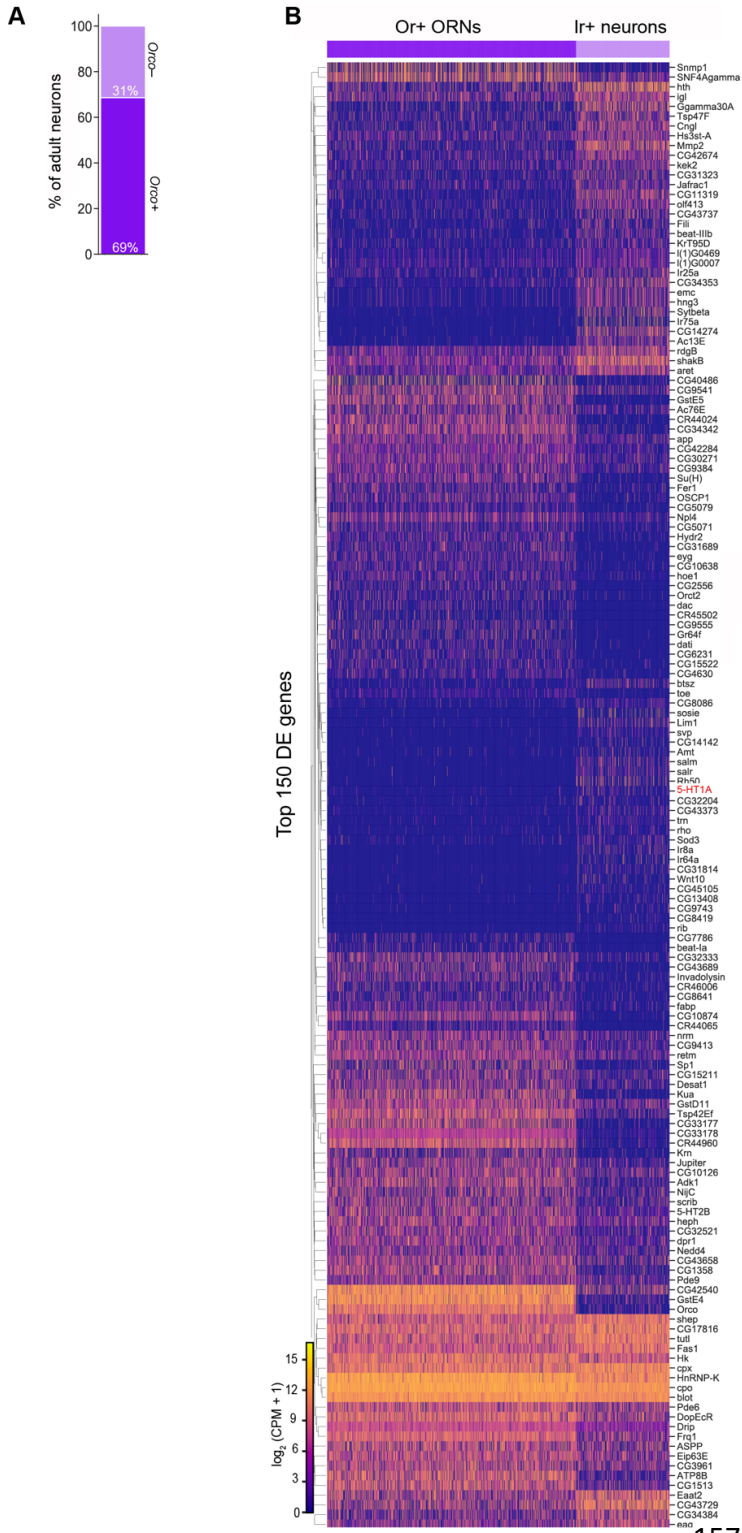

1574 **Figure 8—supplement 1.** Differentially expressed genes in Or- and Ir-expressing neurons. **(A)** Stacked  
1575 bar plot quantifying the percentage of adult antennal neurons that are *Orco* high (e.g., express *Orco* at  
1576  $\log_2(\text{CPM} + 1) \geq 5$ ) and *Orco* low. **(B)** Heatmap of top 150 differentially expressed genes between Or and  
1577 Ir clusters. *5-HT1A* expression is in red.  
1578
